# Supplementary material for: Synthesis of 2,3,4-trisubstituted pyrrole derivatives via [3 + 2] cyclization of activated methylene isocyanides with 4-(arylidene)-2-substituted oxazol-5(4H)-ones
Source: Royal Society of Chemistry journal article supplement (doi:10.1039/c9qo01044k), 2019-12-19

**Supporting Information for**  
**Synthesis of 2,3,4-Trisubstituted Pyrrole Derivatives via [3+2]**  
**Cyclization of Activated Methylene Isocyanides with 4-(Arylidene)-2-**  
**Substituted Oxazol-5(4H) Ones**

**Jing Zhang, Man Liu, Chao Li, Yan-Jun Xu\* and Lin Dong\***

**Table of Contents**

- 1. General Methods**
- 2. General Procedure for the Synthesis of Isocyanoacetate**
- 3. General Procedure for the Synthesis of Phenyloxazol-5(4H)-ones**
- 4. Optimization of the Reaction Conditions**
- 5. General Procedure for Synthesis of 2,3,4-Trisubstituted Pyrroles**
- 6. Mechanism Study**
- 7. Synthetic Application of Products**
- 8. Characterization Data and NMR Spectra of 2,3,4-Trisubstituted pyrroles**

## 1. General Methods

NMR data were obtained for  $^1\text{H}$  at 400 MHz or 600 MHz, and for  $^{13}\text{C}$  at 100 MHz or 151 MHz. Chemical shifts were reported in ppm from tetramethylsilane with the solvent resonance as the internal standard in  $\text{CDCl}_3$  solution. ESI HRMS was recorded on a Waters SYNAPT G2 and Water XEVO G2 Q-ToF. UV detection was monitored at 220 nm. TLC was performed on glass-backed silica plates. Column chromatography was performed on silica gel (200-300 mesh), eluting with ethyl acetate and petroleum ether. Isocyanoacetate **2a**, **2b** and **2g** were commercially available. Isocyanoacetate **2c**, **2d**, **2e** and **2f** were prepared according to the literature procedures<sup>1</sup>. 4-(4-methylbenzylidene)-2-phenyloxazol-5(4H)-ones were prepared according to the literature procedures.<sup>2</sup>

## 2. General Procedure for the Synthesis of Isocyanoacetate<sup>1</sup>

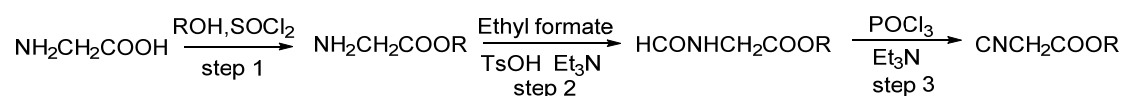

Step 1: A solution of glycine (1.20 g, 10.0 mmol) in isopropyl alcohol (25 mL), thionyl chloride (2.30 mL, 32.0 mmol) was added under the  $-10\text{ }^\circ\text{C}$  and stirred 10 minutes, and then the reaction was heated at  $40\text{ }^\circ\text{C}$  for 4 h. The reaction mixture was then cooled to room temperature and concentrated in vacuo to furnish a sticky oil.

Step 2: The crude residue was dissolved in ethyl formate (5 mL), TsOH (35 mg) and triethylamine (1.5 mL, 11.0 mmol) were then added. The reaction was heated at reflux for 12 h, before cooling to room temperature and concentrating in vacuo. Column chromatography afforded product as a colourless oil.

Step 3: To a solution of colourless oil in DCM (8 mL) at  $0\text{ }^\circ\text{C}$ , Triethylamine (4.20 mL, 30.0 mmol) was added, and then  $\text{POCl}_3$  (0.93 mL, 10.0 mmol) dropwise. The reaction mixture was stirred for 2 h. Saturated sodium carbonate solution (15 mL) was then added and stirred for 30 min before water was added. The aqueous phase was extracted with DCM and the combined organic extracts were washed with brine, dried over anhydrous  $\text{Na}_2\text{SO}_4$  and concentrated in vacuo to get final product.

## 3. General Procedure for the Synthesis of Phenyloxazol-5(4H)-ones<sup>2</sup>

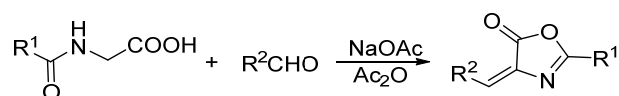

Benzaldehyde or its derivative (5 mmol), N-acetylglycine (5.5 mmol), sodium acetate (2.5 mmol), and acetic anhydride (10 mL) were mixed and heated at  $90\text{ }^\circ\text{C}$  under argon with stirring for 4 h. The mixture was left stirring at  $25\text{ }^\circ\text{C}$ . The precipitate was separated by filtration and washed with ice-cold alcohol, then with water to obtain the oxazolone (49-82% yields).

## References:

- [1] J. R. Wolstenhulme, A. Cavell, M. Gredičak, R. W. Driver, M. D. Smith, *Chem. Commun.* 2014, 50, 13585—13588.
- [2] Q. An, J. Shen, D. Liu, Y. Liu, W. Zhang, *Org. Lett.* 2017, 19, 2925–2928.

## 4. Optimization of the Reaction Conditions

## Screening of Conditions<sup>[a]</sup>

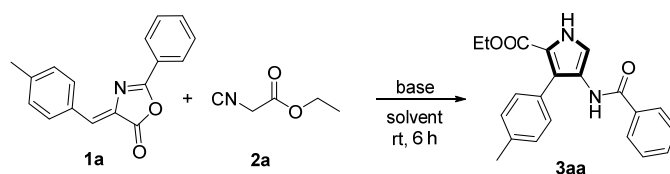

| Entry               | DBU/ equiv | Air/Ar              | Yield <sup>[b]</sup> /% |
|---------------------|------------|---------------------|-------------------------|
| 1                   | DBU/1      | Air                 | 32                      |
| 2                   | DBU/3      | Air                 | 44                      |
| 3                   | DBU/4      | Air                 | 47                      |
| 4 <sup>[c]</sup>    | DBU/2      | Ar                  | 34                      |
| 5 <sup>[c]</sup>    | DBU/2      | Air, 4Å/20mg        | 65                      |
| 6 <sup>[c]</sup>    | DBU/2      | Air, drying reagent | 49                      |
| 7 <sup>[c, d]</sup> | DBU/2      | Air                 | 43                      |
| 8 <sup>[c, e]</sup> | DBU/2      | Air                 | 42                      |

<sup>[a]</sup> Reaction conditions unless otherwise specified: 0.05 mmol of **1a**, 1.5 equiv of **2a**, 0.5 mL PhCl, 6 h, Air atmosphere. <sup>[b]</sup> Isolated yield. <sup>[c]</sup> 1.5 mL PhCl. <sup>[d]</sup> 100 °C <sup>[e]</sup> 120 °C.

## 5. General Procedure for Synthesis of 2,3,4-Trisubstituted Pyrroles

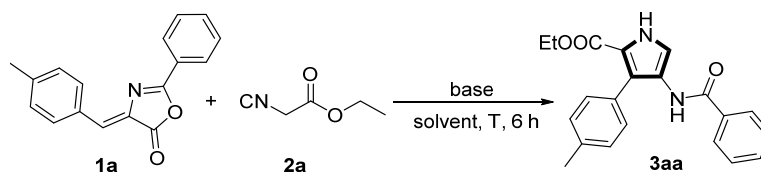

**0.1 mmol scale experiments:** 4-(4-methylbenzylidene)-2-phenyloxazol-5(4H)-ones **1** (26.4 mg, 0.1 mmol), isocyanoacetate **2** (17.0 mg, 1.5 mmol) and DBU (30.4 mg, 2.0 equiv.) were stirred in PhCl (3.0 mL) at rt for 6 h. After completion, the reaction mixture was purified by flash chromatography eluting with ethyl acetate and petroleum ether (1:5) to give the product **3**.

## 6. Mechanism Study

We have done the reaction to monitor whether hydrogen would be released from the system, however, the reaction system would not generate hydrogen. First, we did a control experiment to put a piece of filter paper which was soaked with phosphomolybdic acid and palladium chloride solution (water is solvent) in a bottle filled with hydrogen. The filter paper changed from yellow to blue black. We put the same filter paper in a test tube that reacts under standard reaction conditions, however, we didn't see a change in the filter paper.

Simultaneously, we did the experiment in the glove box under standard conditions, and **3aa** was obtained in 32% yield. The data imply that the reaction might not undergo an oxidation process during the reaction.

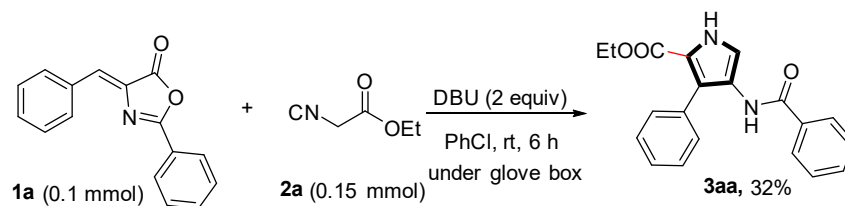

4-(4-methylbenzylidene)-2-phenyloxazol-5(4H)-ones **1** (26.4 mg, 0.1 mmol), isocyanoacetate **2** (17.0 mg, 1.5 mmol) and DBU (30.4 mg, 2.0 equiv.) were stirred in PhCl (3.0 mL) at rt for 0.5 h. Then the reaction mixture was analyzed by LC-MS without purification. The mass spectrum was obtained as below. LC-MS (ESI+): calculated for III  $m/z$  [III + H]<sup>+</sup> (C<sub>22</sub>H<sub>21</sub>N<sub>2</sub>O<sub>4</sub>): 377.2, found: 377.2

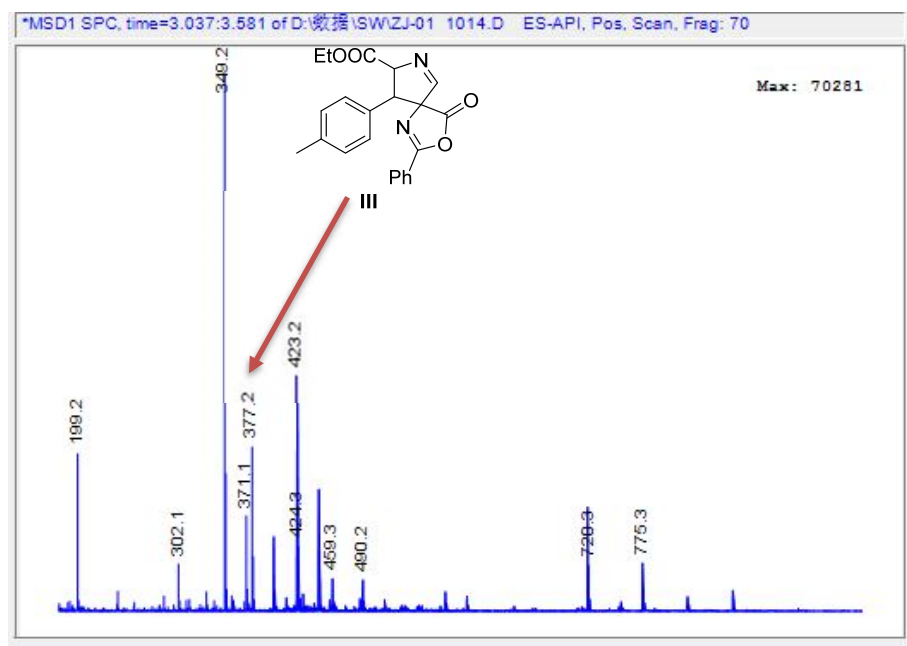

## 7. Synthetic Application of Products

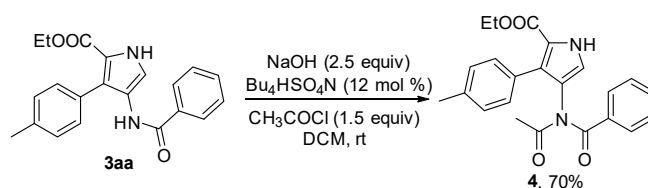

Synthesis of ethyl 4-(N-acetylbenzamido)-3-(p-tolyl)-1H-pyrrole-2-carboxylate **4**: NaOH (5.0 mg, 0.125 mmol) and Bu<sub>4</sub>HSO<sub>4</sub>N (2.0 mg, 12 mol %) was added to a solution of compound **3aa** (0.1 mmol) in DCM, then the CH<sub>3</sub>COCl (1.5 equiv) in DCM was added into the mixture solution and stirred at rt for 10 h. Upon completion, the mixture was then concentrated and the residue was purified by chromatography on silica gel to afford **4** in 70% yields.

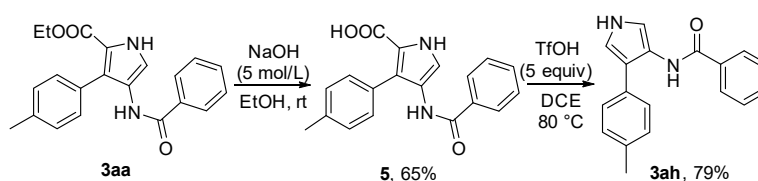

Synthesis of hydrolysis product **5**: 5 mol/L NaOH (0.45 mL) was added to a solution of compound **3aa** (17.4 mg) in EtOH (0.7 mL) and the mixture solution was stirred at rt for 15 h. Upon completion, the mixture was then concentrated and the residue was purified by chromatography on silica gel to afford **5** (10.5 mg) in 65% yield.

Synthesis **3ah**: 5 equiv of TfOH was added to a solution of compound **5** (20 mg) in DCE (1 mL) and the mixture solution was stirred at rt for 1 h. Upon completion, the mixture was then concentrated and the residue was purified by chromatography on silica gel to afford **3ah** (14 mg) in 79% yield.

## 8. Characterization Data and NMR Spectra

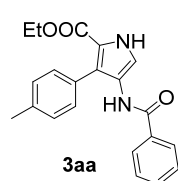

Ethyl 4-benzamido-3-(*p*-tolyl)-1*H*-pyrrole-2-carboxylate (**3aa**). 82% yield. Yellow solid. Mp 164-166 °C. <sup>1</sup>H NMR (400 MHz, CDCl<sub>3</sub>) δ 9.25 (s, 1H), 7.88 (d, *J* = 3.1 Hz, 1H), 7.81 (s, 1H), 7.72 – 7.66 (m, 2H), 7.48 (t, *J* = 7.3 Hz, 1H), 7.41 (t, *J* = 7.4 Hz, 2H), 7.35 (d, *J* = 7.7 Hz, 2H), 7.28 (d, *J* = 7.8 Hz, 2H), 4.21 (q, *J* = 7.1 Hz, 2H), 2.42 (s, 3H), 1.19 (t, *J* = 7.1 Hz, 3H) ppm. <sup>13</sup>C NMR (100 MHz, CDCl<sub>3</sub>) δ 164.2, 160.8, 137.5, 134.2, 131.6, 130.0, 129.2, 128.9, 128.7, 126.8, 122.7, 121.0, 116.9, 113.7, 60.3, 21.3, 14.1 ppm. ESI HRMS: calcd. for C<sub>21</sub>H<sub>20</sub>N<sub>2</sub>O<sub>3</sub>+Na 371.1372, found 371.1366.

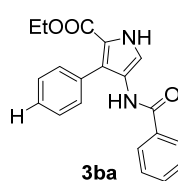

Ethyl 4-benzamido-3-phenyl-1*H*-pyrrole-2-carboxylate (**3ba**). 71% yield. Yellow solid. Mp 155.7-157.7 °C. <sup>1</sup>H NMR (400 MHz, CDCl<sub>3</sub>) δ 9.14 (s, 1H), 7.90 (d, *J* = 3.1 Hz, 1H), 7.77 (s, 1H), 7.68 (dt, *J* = 7.0, 1.4 Hz, 2H), 7.52 – 7.38 (m, 8H), 4.20 (q, *J* = 7.1 Hz, 2H), 1.17 (t, *J* = 7.1 Hz, 3H) ppm. <sup>13</sup>C NMR (100 MHz, CDCl<sub>3</sub>) δ 164.2, 160.7, 134.1, 132.1, 131.6, 130.2, 128.7, 128.5, 127.8, 126.7, 122.7, 120.9, 117.0, 113.6, 60.3, 14.0 ppm. ESI HRMS: calcd. for C<sub>20</sub>H<sub>18</sub>N<sub>2</sub>O<sub>3</sub>+Na 357.1215, found 357.1215.

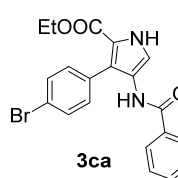

Ethyl 4-benzamido-3-(4-bromophenyl)-1*H*-pyrrole-2-carboxylate (**3ca**). 79% yield. Yellow solid. Mp 154.6-156.6 °C. <sup>1</sup>H NMR (400 MHz, CDCl<sub>3</sub>) δ 9.23 (s, 1H), 7.87 (d, *J* = 3.1 Hz, 1H), 7.72 – 7.67 (m, 2H), 7.66 (s, 1H), 7.63 – 7.58 (m, 2H), 7.54 – 7.48 (m, 1H), 7.44 (ddt, *J* = 8.5, 6.6, 1.4 Hz, 2H), 7.37 – 7.31 (m, 2H), 4.22 (q, *J* = 7.1 Hz, 2H), 1.20 (t, *J* = 7.1 Hz, 3H) ppm. <sup>13</sup>C NMR (100 MHz, CDCl<sub>3</sub>) δ 164.4, 160.7, 134.3, 134.0, 131.7, 130.7, 129.7, 128.8, 128.1, 127.9, 126.8, 122.5, 119.4, 117.2, 114.1, 60.5, 14.0 ppm. ESI HRMS: calcd. for C<sub>20</sub>H<sub>17</sub>BrN<sub>2</sub>O<sub>3</sub>+H 413.0501, found 413.0501.

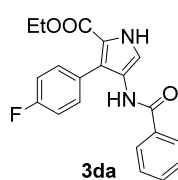

Ethyl 4-benzamido-3-(4-fluorophenyl)-1*H*-pyrrole-2-carboxylate (**3da**). 70% yield. Yellow solid. Mp 165-167 °C. <sup>1</sup>H NMR (400 MHz, CDCl<sub>3</sub>) δ 9.34 (s, 1H), 7.86 (d, *J* = 3.2 Hz, 1H), 7.69 (q, *J* = 2.1 Hz, 1H), 7.67 (d, *J* = 1.7 Hz, 2H), 7.54 – 7.47 (m, 1H), 7.47 – 7.39 (m, 4H), 7.21 – 7.14 (m, 2H), 4.20 (q, *J* = 7.1 Hz, 2H), 1.18 (t, *J* = 7.1 Hz, 3H) ppm. <sup>13</sup>C NMR (100 MHz, CDCl<sub>3</sub>) δ 164.3, 162.4 (d, *J* = 246.0 Hz), 160.7, 134.0, 132.0 (d, *J* = 8.0 Hz), 131.7, 128.8, 128.0 (d, *J* = 4 Hz), 126.7, 122.6, 120.0, 117.1, 115.5 (d, *J* = 21.0 Hz), 114.0, 60.4, 14.1 ppm. ESI HRMS: calcd. for C<sub>20</sub>H<sub>17</sub>FN<sub>2</sub>O<sub>3</sub>+Na 375.1121, found 375.1121.

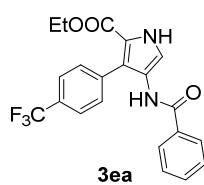

Ethyl 4-benzamido-3-(4-(trifluoromethyl)phenyl)-1*H*-pyrrole-2-carboxylate (**3ea**). 88% yield. Yellow solid. Mp 198.8-200.8 °C. <sup>1</sup>H NMR (400 MHz, CDCl<sub>3</sub>) δ 9.25 (s, 1H), 7.89 (d, *J* = 3.1 Hz, 1H), 7.74 (d, *J* = 8.1 Hz, 2H), 7.71 – 7.66 (m, 2H), 7.62 (s, 1H), 7.59 (d, *J* = 8.0 Hz, 2H), 7.54 – 7.49 (m, 1H), 7.47 – 7.41 (m, 2H), 4.22 (q, *J* = 7.1 Hz, 2H), 1.18 (t, *J* = 7.1 Hz, 3H) ppm. <sup>13</sup>C NMR (100 MHz, CDCl<sub>3</sub>) δ 164.6, 160.4, 136.1 (d, *J* = 1.0 Hz), 133.9, 131.8, 130.7, 129.9 (d, *J* = 32 Hz), 128.8, 126.7, 125.4 (q, *J* = 3.0 Hz), 124.1 (q, *J* = 270.0 Hz), 122.5, 119.6, 117.2, 114.3, 60.5, 14.0 ppm. ESI HRMS: calcd. for C<sub>21</sub>H<sub>17</sub>F<sub>3</sub>N<sub>2</sub>O<sub>3</sub>+H 403.1270, found 403.1269.

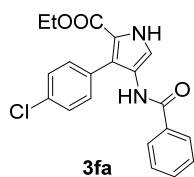

Ethyl 4-benzamido-3-(4-chlorophenyl)-1*H*-pyrrole-2-carboxylate (**3fa**). 70% yield. Yellow solid. Mp 174.8-176.8 °C. <sup>1</sup>H NMR (400 MHz, CDCl<sub>3</sub>) δ 9.18 (s, 1H), 7.87 (d, *J* = 3.2 Hz, 1H), 7.72 – 7.66 (m, 2H), 7.65 (s, 1H), 7.54 – 7.48 (m, 1H), 7.48 – 7.37 (m, 6H), 4.22 (q, *J* = 7.1 Hz, 2H), 1.20 (t, *J* = 7.1 Hz, 3H) ppm. <sup>13</sup>C NMR (100 MHz, CDCl<sub>3</sub>) δ 164.4, 160.5, 134.0, 133.8, 131.8, 131.6, 130.6, 128.8, 128.7, 126.7, 122.6, 119.7, 117.1, 114.0, 60.4, 14.1 ppm. ESI HRMS: calcd. for C<sub>20</sub>H<sub>17</sub>ClN<sub>2</sub>O<sub>2</sub>+H 369.1006, found 369.1006.

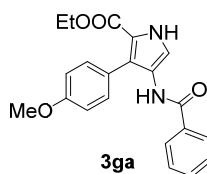

Ethyl 4-benzamido-3-(4-methoxyphenyl)-1*H*-pyrrole-2-carboxylate (**3ga**). 56% yield. Yellow solid. Mp 154.1-156.1 °C. <sup>1</sup>H NMR (400 MHz, CDCl<sub>3</sub>) δ 9.09 (s, 1H), 7.87 (d, *J* = 3.1 Hz, 1H), 7.77 (s, 1H), 7.69 (dd, *J* = 8.2, 1.3 Hz, 2H), 7.53 – 7.46 (m, 1H), 7.46 – 7.35 (m, 4H), 7.07 – 6.99 (m, 2H), 4.22 (q, *J* = 7.1 Hz, 2H), 3.88 (s, 3H), 1.21 (t, *J* = 7.1 Hz, 3H) ppm. <sup>13</sup>C NMR (100 MHz, CDCl<sub>3</sub>) δ 164.2, 160.7, 159.2, 134.1, 131.6, 131.4, 128.7, 126.7, 124.0, 122.8, 120.7, 116.9, 114.0, 113.5, 60.2, 55.3, 14.2 ppm. ESI HRMS: calcd. for C<sub>21</sub>H<sub>20</sub>N<sub>2</sub>O<sub>4</sub>+Na 387.1321, found 387.1320.

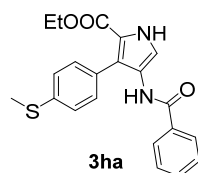

Ethyl 4-benzamido-3-(4-(methylthio)phenyl)-1*H*-pyrrole-2-carboxylate (**3ha**). 42% yield. Yellow solid. Mp 182.1-184.1 °C. <sup>1</sup>H NMR (400 MHz, CDCl<sub>3</sub>) δ 9.09 (s, 1H), 7.88 (d, *J* = 3.1 Hz, 1H), 7.74 (s, 1H), 7.72 – 7.67 (m, 2H), 7.53 – 7.47 (m, 1H), 7.43 (dd, *J* = 8.2, 6.6 Hz, 2H), 7.41 – 7.34 (m, 4H), 4.22 (q, *J* = 7.1 Hz, 2H), 2.55 (s, 3H), 1.21 (t, *J* = 7.1 Hz, 3H) ppm. <sup>13</sup>C NMR (100 MHz, CDCl<sub>3</sub>) δ 164.3, 160.6, 138.3, 134.1, 131.7, 130.6, 128.8, 128.5, 126.7, 126.3, 122.7, 120.4, 117.0, 113.7, 60.3, 15.6, 14.2 ppm. ESI HRMS: calcd. for C<sub>21</sub>H<sub>20</sub>N<sub>2</sub>O<sub>3</sub>S+H 381.1273, found 381.1275.

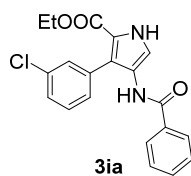

Ethyl 4-benzamido-3-(3-chlorophenyl)-1*H*-pyrrole-2-carboxylate (**3ia**). 86% yield. Yellow solid. Mp 152.7-154.7 °C. <sup>1</sup>H NMR (400 MHz, CDCl<sub>3</sub>) δ 9.32 (s, 1H), 7.88 (s, 1H), 7.70 (dt, *J* = 7.1, 1.4 Hz, 3H), 7.54 – 7.47 (m, 2H), 7.46 – 7.36 (m, 4H), 7.34 (dt, *J* = 7.0, 1.8 Hz, 1H), 4.22 (q, *J* = 7.1 Hz, 2H), 1.19 (t, *J* = 7.1 Hz, 3H) ppm. <sup>13</sup>C NMR (100 MHz, CDCl<sub>3</sub>) δ 164.4, 160.7, 134.3, 134.0, 131.7, 130.7, 129.7, 128.8, 128.1, 127.9, 126.8, 122.5, 119.4, 117.2, 114.1, 60.5, 14.0 ppm. ESI HRMS: calcd. for C<sub>20</sub>H<sub>17</sub>ClN<sub>2</sub>O<sub>3</sub>+Na 391.0825, found 391.0823.

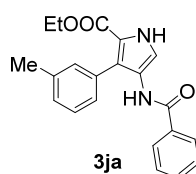

Ethyl 4-benzamido-3-(*m*-tolyl)-1*H*-pyrrole-2-carboxylate (**3ja**). 81% yield. Yellow solid. Mp 155.4-157.4°C. <sup>1</sup>H NMR (400 MHz, CDCl<sub>3</sub>) δ 9.20 (s, 1H), 7.89 (d, *J* = 3.1 Hz, 1H), 7.81 (s, 1H), 7.68 (dt, *J* = 7.1, 1.4 Hz, 2H), 7.52 – 7.45 (m, 1H), 7.45 – 7.35 (m, 3H), 7.31 – 7.19 (m, 3H), 4.21 (q, *J* = 7.1 Hz, 2H), 2.42 (s, 3H), 1.18 (t, *J* = 7.1 Hz, 3H) ppm. <sup>13</sup>C NMR (100 MHz, CDCl<sub>3</sub>) δ 164.1, 160.8, 138.1, 134.2, 131.9, 131.6, 131.0, 128.7, 128.5, 128.4, 127.0, 126.7, 122.7, 120.9, 116.9, 113.6, 60.2, 21.4, 14.0 ppm. ESI HRMS: calcd. for C<sub>21</sub>H<sub>20</sub>N<sub>2</sub>O<sub>3</sub>+Na 371.1372, found 371.1368.

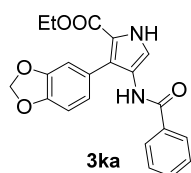

Ethyl 4-benzamido-3-(benzo[*d*][1,3]dioxol-5-yl)-1*H*-pyrrole-2-carboxylate (**3ka**). 55% yield. Yellow solid. Mp 175.9-177.9°C. <sup>1</sup>H NMR (400 MHz, CDCl<sub>3</sub>) δ 9.23 – 9.05 (m, 1H), 7.86 (d, *J* = 3.1 Hz, 1H), 7.79 (s, 1H), 7.75 – 7.67 (m, 2H), 7.56 – 7.40 (m, 3H), 6.99 – 6.85 (m, 3H), 6.03 (s, 2H), 4.23 (q, *J* = 7.1 Hz, 2H), 1.23 (t, *J* = 7.1 Hz, 3H) ppm. <sup>13</sup>C NMR (100MHz, CDCl<sub>3</sub>) δ 164.2, 160.6, 147.8, 147.3, 134.1, 131.6, 128.8, 126.8, 125.5, 123.1, 122.8, 120.6, 117.0, 113.5, 111.2, 108.3, 101.2, 60.3, 14.1 ppm. ESI HRMS: calcd. for C<sub>21</sub>H<sub>18</sub>N<sub>2</sub>O<sub>5</sub>+Na 401.1113, found 401.1114.

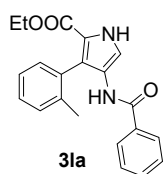

Ethyl 4-benzamido-3-(*o*-tolyl)-1*H*-pyrrole-2-carboxylate (**3la**). 74% yield. Yellow solid. Mp 178.2-180.2°C. <sup>1</sup>H NMR (400 MHz, CDCl<sub>3</sub>) δ 9.17 (s, 1H), 7.84 (d, *J* = 3.1 Hz, 1H), 7.57 – 7.51 (m, 2H), 7.42 – 7.37 (m, 1H), 7.36 (s, 1H), 7.34 – 7.28 (m, 2H), 7.28 – 7.22 (m, 2H), 7.22 – 7.15 (m, 2H), 4.07 (p, *J* = 7.1 Hz, 2H), 2.11 (s, 3H), 1.01 (t, *J* = 7.1 Hz, 3H) ppm. <sup>13</sup>C NMR (100MHz, CDCl<sub>3</sub>) δ 163.1, 159.8, 136.8, 133.1, 130.5, 130.4, 129.3, 129.2, 127.7, 127.2, 125.7, 124.8, 121.9, 119.0, 116.3, 112.4, 59.1, 18.8, 12.9 ppm. ESI HRMS: calcd. for C<sub>21</sub>H<sub>20</sub>N<sub>2</sub>O<sub>3</sub>+H 349.1552, found 349.1551.

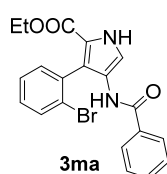

Ethyl 4-benzamido-3-(2-bromophenyl)-1*H*-pyrrole-2-carboxylate (**3ma**). 55% yield. Yellow solid. Mp 187.2-189.2°C. <sup>1</sup>H NMR (400 MHz, CDCl<sub>3</sub>) δ 9.14 (s, 1H), 7.87 (d, *J* = 3.1 Hz, 1H), 7.74 (d, *J* = 8.0 Hz, 1H), 7.71 – 7.65 (m, 2H), 7.52 – 7.35 (m, 6H), 7.32 – 7.26 (m, 1H), 4.15 (q, *J* = 7.1 Hz, 2H), 1.09 (t, *J* = 7.1 Hz, 3H) ppm. <sup>13</sup>C NMR (100MHz, CDCl<sub>3</sub>) δ 164.5, 160.5, 134.2, 133.4, 132.8, 132.8, 131.6, 129.7, 128.7, 127.3, 126.8, 124.6, 122.8, 119.8, 117.7, 113.8, 60.3, 13.9 ppm. ESI HRMS: calcd. for C<sub>20</sub>H<sub>17</sub>BrN<sub>2</sub>O<sub>3</sub>+Na 435.0320, found 435.0320.

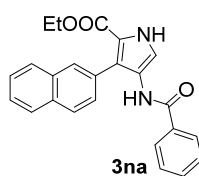

Ethyl 4-benzamido-3-(naphthalen-2-yl)-1*H*-pyrrole-2-carboxylate (**3na**). 40% yield. Yellow solid. Mp 211.7-213.7 °C. <sup>1</sup>H NMR (400 MHz, CDCl<sub>3</sub>) δ 9.35 (s, 1H), 8.01 (d, *J* = 3.1 Hz, 1H), 7.93 (d, *J* = 8.2 Hz, 2H), 7.76 (d, *J* = 8.4 Hz, 1H), 7.58 (dd, *J* = 8.1, 7.0 Hz, 1H), 7.51 (ddd, *J* = 8.2, 6.8, 1.4 Hz, 2H), 7.47 – 7.36 (m, 5H), 7.32 – 7.24 (m, 2H), 3.99 (q, *J* = 7.1 Hz, 2H), 0.78 (t, *J* = 7.1 Hz, 3H) ppm. <sup>13</sup>C NMR (100 MHz, CDCl<sub>3</sub>) δ 164.3, 160.9, 134.0, 133.8, 132.3, 131.5, 129.7, 128.6, 128.5, 128.4, 126.6, 126.4, 126.0, 125.9, 125.4, 123.6, 118.4, 118.3, 113.7, 60.1, 13.5 ppm. ESI HRMS: calcd. for C<sub>24</sub>H<sub>20</sub>N<sub>2</sub>O<sub>3</sub>+Na 407.1372, found 407.1369.

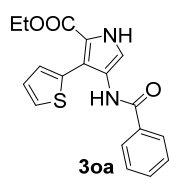

Ethyl 4-benzamido-3-(thiophen-2-yl)-1*H*-pyrrole-2-carboxylate (**30a**). 54% yield. Yellow solid. Mp 171.0-173.0 °C. <sup>1</sup>H NMR (400 MHz, CDCl<sub>3</sub>) δ 9.25 (s, 1H), 8.04 (s, 1H), 7.89 (d, *J* = 3.2 Hz, 1H), 7.78 – 7.72 (m, 2H), 7.54 – 7.48 (m, 1H), 7.48 – 7.41 (m, 3H), 7.23 – 7.15 (m, 2H), 4.26 (q, *J* = 7.1 Hz, 2H), 1.25 (t, *J* = 7.1 Hz, 3H) ppm. <sup>13</sup>C NMR (100 MHz, CDCl<sub>3</sub>) δ 164.2, 160.4, 134.1, 132.2, 131.7, 128.8, 128.4, 127.4, 126.8, 126.6, 123.5, 117.8, 113.5, 112.9, 60.5, 14.1 ppm. ESI HRMS: calcd. for C<sub>18</sub>H<sub>16</sub>N<sub>2</sub>O<sub>3</sub>S+Na 363.0779, found 363.0782.

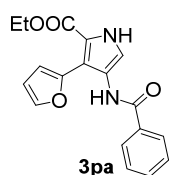

Ethyl 4-benzamido-3-(furan-2-yl)-1*H*-pyrrole-2-carboxylate (**3pa**). 44% yield. Yellow solid. Mp 166.4-168.4 °C. <sup>1</sup>H NMR (400 MHz, CDCl<sub>3</sub>) δ 9.48 (s, 1H), 9.11 (s, 1H), 8.01 (d, *J* = 3.2 Hz, 1H), 7.90 (dt, *J* = 6.7, 1.6 Hz, 2H), 7.58 (d, *J* = 1.9 Hz, 1H), 7.57 – 7.45 (m, 3H), 7.31 (d, *J* = 3.5 Hz, 1H), 6.58 (dd, *J* = 3.5, 1.9 Hz, 1H), 4.37 (q, *J* = 7.2 Hz, 2H), 1.39 (t, *J* = 7.1 Hz, 3H) ppm. <sup>13</sup>C NMR (100 MHz, CDCl<sub>3</sub>) δ 164.2, 159.9, 148.3, 140.9, 134.4, 131.6, 128.8, 126.8, 123.1, 115.4, 114.0, 111.9, 110.8, 110.0, 60.6, 14.4 ppm. ESI HRMS: calcd. for C<sub>18</sub>H<sub>16</sub>N<sub>2</sub>O<sub>4</sub>+Na 347.1008, found 347.1008.

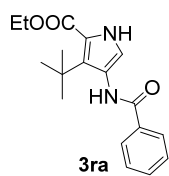

Ethyl 4-benzamido-3-(*tert*-butyl)-1*H*-pyrrole-2-carboxylate (**3ra**). 55% yield. Yellow solid. Mp 135.3-137.3 °C. <sup>1</sup>H NMR (400 MHz, CDCl<sub>3</sub>) δ 9.26 (s, 1H), 7.98 (s, 1H), 7.88 – 7.81 (m, 2H), 7.60 – 7.43 (m, 4H), 4.31 (q, *J* = 7.1 Hz, 2H), 1.57 (s, 9H), 1.36 (t, *J* = 7.1 Hz, 3H) ppm. <sup>13</sup>C NMR (100 MHz, CDCl<sub>3</sub>) δ 165.3, 160.0, 134.7, 131.7, 131.6, 128.8, 126.8, 121.1, 117.3, 117.1, 60.3, 33.4, 31.2, 14.4 ppm. ESI HRMS: calcd. for C<sub>20</sub>H<sub>26</sub>N<sub>2</sub>O<sub>3</sub>+Na 365.1841, found 365.1843.

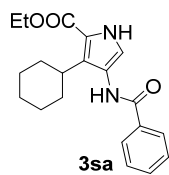

Ethyl 4-benzamido-3-cyclohexyl-1*H*-pyrrole-2-carboxylate (**3sa**). 60% yield. Yellow solid. Mp 173.1-175.1 °C. <sup>1</sup>H NMR (400 MHz, CDCl<sub>3</sub>) δ 8.98 (s, 1H), 7.92 – 7.82 (m, 2H), 7.77 (s, 1H), 7.63 – 7.43 (m, 4H), 4.32 (q, *J* = 7.1 Hz, 2H), 3.40 (tt, *J* = 12.6, 3.3 Hz, 1H), 1.87 (tt, *J* = 10.8, 3.1 Hz, 4H), 1.76 (ddd, *J* = 24.9, 13.3, 3.4 Hz, 3H), 1.44 (ddd, *J* = 16.8, 8.5, 3.7 Hz, 2H), 1.37 (t, *J* = 7.1 Hz, 3H), 1.28 (tt, *J* = 13.0, 3.1 Hz, 1H) ppm. <sup>13</sup>C NMR (100 MHz, CDCl<sub>3</sub>) δ 164.7, 160.9, 134.6, 131.6, 128.9, 127.5, 126.8, 122.1, 116.5, 115.8, 60.1, 35.3, 32.4, 27.1, 26.4, 14.4 ppm. ESI HRMS: calcd. for C<sub>20</sub>H<sub>24</sub>N<sub>2</sub>O<sub>3</sub>+Na 363.1685, found 363.1690.

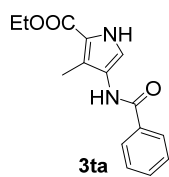

Ethyl 4-benzamido-3-methyl-1*H*-pyrrole-2-carboxylate (**3ta**). 52% yield. Yellow solid. Mp 180.0-182.0 °C. <sup>1</sup>H NMR (400 MHz, CDCl<sub>3</sub>) δ 8.86 (s, 1H), 7.91 – 7.82 (m, 2H), 7.60 – 7.52 (m, 3H), 7.52 – 7.46 (m, 2H), 4.34 (q, *J* = 7.1 Hz, 2H), 2.36 (s, 3H), 1.38 (t, *J* = 7.1 Hz, 3H) ppm. <sup>13</sup>C NMR (100 MHz, CDCl<sub>3</sub>) δ 164.9, 161.3, 134.4, 131.7, 128.8, 126.9, 122.9, 117.6, 117.5, 114.7, 60.2, 14.5, 9.1 ppm. ESI HRMS: calcd. for C<sub>15</sub>H<sub>16</sub>N<sub>2</sub>O<sub>3</sub>+H 273.1239, found 273.1245.

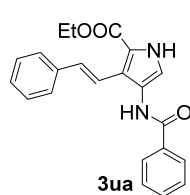

Ethyl (*E*)-4-benzamido-3-styryl-1*H*-pyrrole-2-carboxylate (**3ua**). 42% yield. Yellow solid. Mp 160.5-162.5 °C. <sup>1</sup>H NMR (400 MHz, CDCl<sub>3</sub>) δ 9.16 (s, 1H), 8.12 (s, 1H), 7.91 – 7.83 (m, 2H), 7.78 (d, *J* = 3.1 Hz, 1H), 7.66 (d, *J* = 17.0 Hz, 1H), 7.58 – 7.44 (m, 5H), 7.37 (dd, *J* = 8.4, 6.8 Hz, 2H), 7.33 – 7.24 (m, 1H), 6.92 (d, *J* = 17.0 Hz, 1H), 4.36 (q, *J* = 7.1 Hz, 2H), 1.39 (t, *J* = 7.1 Hz, 3H) ppm. <sup>13</sup>C NMR (100 MHz,

$\text{CDCl}_3$ )  $\delta$  164.6, 160.8, 137.3, 134.2, 131.8, 131.0, 128.9, 128.8, 127.8, 126.8, 126.2, 121.8, 121.3, 118.2, 117.8, 115.2, 60.6, 14.4 ppm. ESI HRMS: calcd. for  $\text{C}_{24}\text{H}_{24}\text{N}_2\text{O}_3+\text{Na}$  411.1685, found 411.1688.

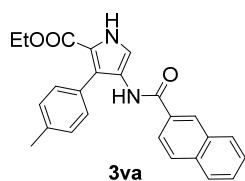

Ethyl 4-(2-naphthamido)-3-(*p*-tolyl)-1*H*-pyrrole-2-carboxylate (**3va**). 66% yield. Yellow solid. Mp 206.5-208.5 °C.  $^1\text{H}$  NMR (400 MHz,  $\text{CDCl}_3$ )  $\delta$  9.13 (s, 1H), 8.23 (d,  $J$  = 1.8 Hz, 1H), 8.01 – 7.80 (m, 5H), 7.72 (dd,  $J$  = 8.5, 1.8 Hz, 1H), 7.54 (tt,  $J$  = 7.0, 5.2 Hz, 2H), 7.39 (d,  $J$  = 7.9 Hz, 2H), 7.31 (d,  $J$  = 7.8 Hz, 2H), 4.23 (q,  $J$  = 7.1 Hz, 2H), 2.44 (s, 3H), 1.21 (t,  $J$  = 7.1 Hz, 3H) ppm.  $^{13}\text{C}$  NMR (100 MHz,  $\text{CDCl}_3$ )  $\delta$  164.3, 160.7, 137.6, 134.7, 132.6, 131.4, 130.1, 129.3, 129.0, 128.9, 128.6, 127.8, 127.7, 127.5, 126.8, 123.1, 122.8, 121.0, 116.9, 113.7, 60.3, 21.3, 14.1 ppm. ESI HRMS: calcd. for  $\text{C}_{25}\text{H}_{22}\text{N}_2\text{O}_3+\text{Na}$  421.1528, found 421.1530.

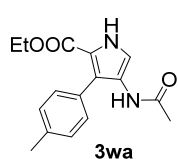

Ethyl 4-acetamido-3-(*p*-tolyl)-1*H*-pyrrole-2-carboxylate (**3wa**). 26% yield. Yellow solid. Mp 202.8-204.8 °C.  $^1\text{H}$  NMR (400 MHz,  $\text{CDCl}_3$ )  $\delta$  9.08 (s, 1H), 7.68 (d,  $J$  = 3.1 Hz, 1H), 7.26 (s, 3H), 6.97 (s, 1H), 4.18 (q,  $J$  = 7.1 Hz, 2H), 2.41 (s, 3H), 2.04 (s, 3H), 1.17 (t,  $J$  = 7.1 Hz, 3H) ppm.  $^{13}\text{C}$  NMR (100 MHz,  $\text{CDCl}_3$ )  $\delta$  167.2, 160.6, 137.4, 130.0, 129.1, 128.9, 122.7, 120.6, 116.8, 113.5, 60.2, 23.7, 21.3, 14.1 ppm. ESI HRMS: calcd. for  $\text{C}_{16}\text{H}_{18}\text{N}_2\text{O}_3+\text{Na}$  287.1396, found 287.1390.

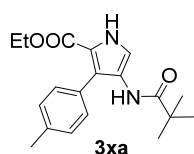

Ethyl 4-pivalamido-3-(*p*-tolyl)-1*H*-pyrrole-2-carboxylate (**3xa**). 28% yield. Yellow solid. Mp 146.8-148.8 °C.  $^1\text{H}$  NMR (400 MHz,  $\text{CDCl}_3$ )  $\delta$  8.92 (s, 1H), 7.64 (d,  $J$  = 3.1 Hz, 1H), 7.27 (s, 1H), 7.24 – 7.16 (m, 4H), 4.13 (q,  $J$  = 7.1 Hz, 2H), 2.34 (s, 3H), 1.12 (d,  $J$  = 4.5 Hz, 12H) ppm.  $^{13}\text{C}$  NMR (100 MHz,  $\text{CDCl}_3$ )  $\delta$  175.5, 160.7, 137.4, 129.9, 129.1, 128.9, 122.8, 120.7, 116.6, 113.1, 60.2, 39.1, 27.5, 21.3, 14.1 ppm. ESI HRMS: calcd. for  $\text{C}_{19}\text{H}_{24}\text{N}_2\text{O}_3+\text{Na}$  351.1685, found 351.1682.

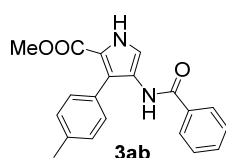

Methyl 4-benzamido-3-(*p*-tolyl)-1*H*-pyrrole-2-carboxylate (**3ab**). 71% yield. Yellow solid. Mp 169.3-171.3 °C.  $^1\text{H}$  NMR (400 MHz,  $\text{CDCl}_3$ )  $\delta$  9.14 (s, 1H), 7.89 (d,  $J$  = 3.1 Hz, 1H), 7.80 (s, 1H), 7.72 – 7.66 (m, 2H), 7.52 – 7.46 (m, 1H), 7.45 – 7.39 (m, 2H), 7.37 – 7.28 (m, 4H), 3.73 (s, 3H), 2.43 (s, 3H) ppm.  $^{13}\text{C}$  NMR (100 MHz,  $\text{CDCl}_3$ )  $\delta$  164.2, 161.1, 137.6, 134.1, 131.6, 129.9, 129.4, 128.8, 128.7, 126.8, 122.8, 121.1, 116.6, 113.7, 51.3, 21.3 ppm. ESI HRMS: calcd. for  $\text{C}_{20}\text{H}_{18}\text{N}_2\text{O}_3+\text{Na}$  357.1215, found 357.1214.

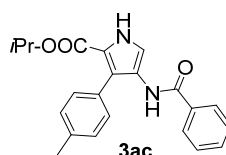

Isopropyl 4-benzamido-3-(*p*-tolyl)-1*H*-pyrrole-2-carboxylate (**3ac**). 61% yield. Yellow solid. Mp 154.4-156.4 °C.  $^1\text{H}$  NMR (400 MHz,  $\text{CDCl}_3$ )  $\delta$  9.14 (s, 1H), 7.87 (d,  $J$  = 3.1 Hz, 1H), 7.80 (s, 1H), 7.69 (dd,  $J$  = 7.2, 1.8 Hz, 2H), 7.52 – 7.46 (m, 1H), 7.42 (dd,  $J$  = 8.2, 6.6 Hz, 2H), 7.34 (d,  $J$  = 8.1 Hz, 2H), 7.31 – 7.24 (m, 2H), 5.10 (p,  $J$  = 6.2 Hz, 1H), 2.43 (s, 3H), 1.18 (d,  $J$  = 6.2 Hz, 6H) ppm.  $^{13}\text{C}$  NMR (100 MHz,  $\text{CDCl}_3$ )  $\delta$  164.2, 160.2, 137.5, 134.2, 131.6, 130.1, 129.2, 129.0, 128.7, 126.8, 122.7, 120.9, 117.3, 113.3, 67.9, 21.8, 21.34 ppm. ESI HRMS: calcd. for  $\text{C}_{22}\text{H}_{22}\text{N}_2\text{O}_3+\text{Na}$  385.1528, found 385.1527.

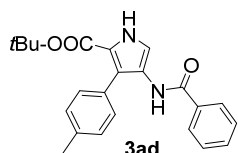

*Tert*-butyl 4-benzamido-3-(*p*-tolyl)-1*H*-pyrrole-2-carboxylate (**3ad**). 50% yield. Yellow solid. Mp 147.3-149.3 °C. <sup>1</sup>H NMR (400 MHz, CDCl<sub>3</sub>) δ 8.99 (s, 1H), 7.84 (d, *J* = 3.1 Hz, 1H), 7.75 (s, 1H), 7.68 (dt, *J* = 7.1, 1.4 Hz, 2H), 7.51 – 7.46 (m, 1H), 7.42 (dd, *J* = 8.2, 6.6 Hz, 2H), 7.32 (d, *J* = 8.1 Hz, 2H), 7.28 (d, *J* = 8.0 Hz, 2H), 2.42 (s, 3H), 1.40 (s, 9H) ppm. <sup>13</sup>C NMR (100 MHz, CDCl<sub>3</sub>) δ 164.1, 160.2, 137.3, 134.2, 131.5, 130.1, 129.3, 129.2, 128.7, 126.7, 122.6, 120.3, 118.3, 112.8, 81.1, 28.2, 21.3 ppm. ESI HRMS: calcd. for C<sub>23</sub>H<sub>24</sub>N<sub>2</sub>O<sub>3</sub>+Na 399.1685, found 399.1678.

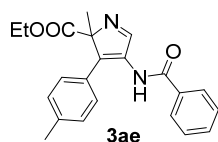

Ethyl 4-benzamido-2-methyl-3-(*p*-tolyl)-2*H*-pyrrole-2-carboxylate (**3ae**). 52% yield. Yellow liquid. <sup>1</sup>H NMR (400 MHz, CDCl<sub>3</sub>) δ 9.17 (s, 1H), 7.88 (s, 1H), 7.79 (dd, *J* = 7.2, 1.7 Hz, 2H), 7.61 – 7.54 (m, 1H), 7.48 (dd, *J* = 8.3, 6.9 Hz, 2H), 7.28 (d, *J* = 7.9 Hz, 2H), 7.17 (d, *J* = 8.1 Hz, 2H), 4.18 (qd, *J* = 7.1, 4.9 Hz, 2H), 2.40 (s, 3H), 1.60 (s, 3H), 1.22 (t, *J* = 7.1 Hz, 3H) ppm. <sup>13</sup>C NMR (100 MHz, CDCl<sub>3</sub>) δ 169.6, 165.1, 163.2, 144.7, 138.9, 133.3, 133.2, 132.4, 130.2, 128.9, 128.8, 127.4, 127.2, 83.9, 61.9, 21.3, 19.5, 14.0 ppm. ESI HRMS: calcd. for C<sub>22</sub>H<sub>22</sub>N<sub>2</sub>O<sub>3</sub>+Na 385.1528, found 385.1522.

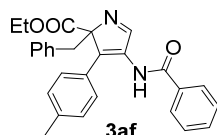

Ethyl 4-benzamido-2-benzyl-3-(*p*-tolyl)-2*H*-pyrrole-2-carboxylate (**3af**). 52% yield. Yellow solid. Mp 140.8-142.8 °C. <sup>1</sup>H NMR (400 MHz, CDCl<sub>3</sub>) δ 9.04 (s, 1H), 7.83 (s, 1H), 7.67 – 7.59 (m, 2H), 7.51 – 7.40 (m, 1H), 7.36 (dd, *J* = 8.2, 6.9 Hz, 2H), 7.24 (d, *J* = 7.9 Hz, 2H), 7.12 – 6.96 (m, 5H), 6.78 (dd, *J* = 7.3, 2.3 Hz, 2H), 4.14 (q, *J* = 7.1 Hz, 2H), 3.80 (d, *J* = 13.6 Hz, 1H), 3.14 (d, *J* = 13.6 Hz, 1H), 2.37 (s, 3H), 1.15 (t, *J* = 7.1 Hz, 3H) ppm. <sup>13</sup>C NMR (100 MHz, CDCl<sub>3</sub>) δ 168.3, 163.4, 162.8, 140.4, 137.8, 133.8, 133.4, 132.1, 131.3, 129.3, 129.2, 128.2, 127.8, 126.4, 126.3, 126.1, 125.6, 85.6, 61.0, 38.0, 20.3, 13.0 ppm. ESI HRMS: calcd. for C<sub>28</sub>H<sub>26</sub>N<sub>2</sub>O<sub>3</sub>+Na 461.1841, found 461.1842.

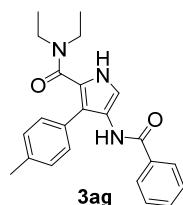

4-benzamido-*N,N*-diethyl-3-(*p*-tolyl)-1*H*-pyrrole-2-carboxamide (**3ag**). 49% yield. Yellow liquid. <sup>1</sup>H NMR (400 MHz, CDCl<sub>3</sub>) δ 9.27 (s, 1H), 7.84 (s, 1H), 7.74 (dt, *J* = 10.3, 2.1 Hz, 3H), 7.54 - 7.38 (m, 3H), 7.27 (d, *J* = 1.9 Hz, 4H), 3.20 (s, 4H), 2.41 (s, 3H), 0.86 (s, 6H) ppm. <sup>13</sup>C NMR (100 MHz, CDCl<sub>3</sub>) δ 164.3, 164.1, 137.3, 134.4, 131.4, 130.1, 129.1, 128.7, 126.8, 121.2, 120.2, 115.6, 111.7, 21.2, 12.7 ppm. ESI HRMS: calcd. for C<sub>23</sub>H<sub>25</sub>N<sub>3</sub>O<sub>2</sub>+Na 398.1844, found 398.1844.

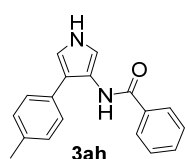

*N*-(4-(*p*-tolyl)-1*H*-pyrrol-3-yl)benzamide (**3ah**). 74% yield. Yellow liquid. <sup>1</sup>H NMR (400 MHz, CDCl<sub>3</sub>) δ 8.27 (s, 1H), 8.00 (s, 1H), 7.83-7.74 (m, 2H), 7.66 (t, *J* = 2.6 Hz, 1H), 7.55-7.39 (m, 3H), 7.39 - 7.30 (m, 2H), 7.30 - 7.20 (m, 2H), 6.77 (t, *J* = 2.7 Hz, 1H), 2.40 (s, 3H) ppm. <sup>13</sup>C NMR (100 MHz, CDCl<sub>3</sub>) δ 164.2, 136.3, 134.6, 131.4, 131.2, 130.0, 128.7, 127.8, 126.8, 120.0, 116.7, 114.3, 110.2, 21.1 ppm. ESI HRMS: calcd. for C<sub>18</sub>H<sub>16</sub>N<sub>2</sub>O+Na 299.1160, found 299.1160.

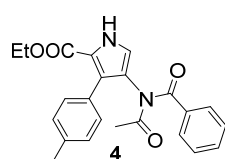

Ethyl 4-(*N*-acetylbenzamido)-3-(*p*-tolyl)-1*H*-pyrrole-2-carboxylate (**4**). 70% yield. White solid. Mp 149.8-151.8 °C. <sup>1</sup>H NMR (400 MHz, CDCl<sub>3</sub>) δ 9.47 (s, 1H), 7.43 - 7.34 (m, 1H), 7.35 - 7.20 (m, 4H), 7.20 - 7.05 (m, 4H), 6.94 (d, *J* = 3.3 Hz, 1H), 4.15 (q, *J* = 7.1 Hz, 2H), 2.37 (s, 3H), 2.24 (s, 3H), 1.12 (t, *J* = 7.1 Hz, 3H) ppm. <sup>13</sup>C NMR (100 MHz, CDCl<sub>3</sub>) δ 174.3, 173.0, 160.7, 137.4, 135.0, 131.5,

O=C(Nc1c[nH]c(C(=O)O)c1-c1ccc(C)cc1)c2ccccc2Cc1ccc(cc1)c2cc[nH]c2NC(=O)c3ccccc3

**3ah**

Chemical structure of **3aa** is shown above the spectrum. The structure is a 1H-imidazole-4-carboxylate derivative with a 4-methylphenyl group at position 2 and a benzoylamino group at position 3.

CC1=CC=C(C=C1)c2c[nH]c2NC(=O)c3ccccc3

**3aa**

The <sup>1</sup>H NMR spectrum (CDCl<sub>3</sub>) shows the following peaks (ppm):

- 9.254 (s, 0.91)
- 7.883 (s, 0.95)
- 7.802 (s, 0.84)
- 7.701 (s, 1.08)
- 7.692 (s, 1.01)
- 7.603 (s, 1.01)
- 7.503 (s, 1.01)
- 7.464 (s, 1.01)
- 7.437 (s, 1.01)
- 7.416 (s, 1.01)
- 7.399 (s, 1.01)
- 7.378 (s, 1.01)
- 7.357 (s, 1.01)
- 7.336 (s, 1.01)
- 7.315 (s, 1.01)
- 7.294 (s, 1.01)
- 7.273 (s, 1.01)
- 7.252 (s, 1.01)
- 4.236 (s, 1.08)
- 4.205 (s, 1.08)
- 4.183 (s, 1.08)
- 2.453 (s, 2.91)
- 1.192 (s, 3.00)
- 1.174 (s, 3.00)

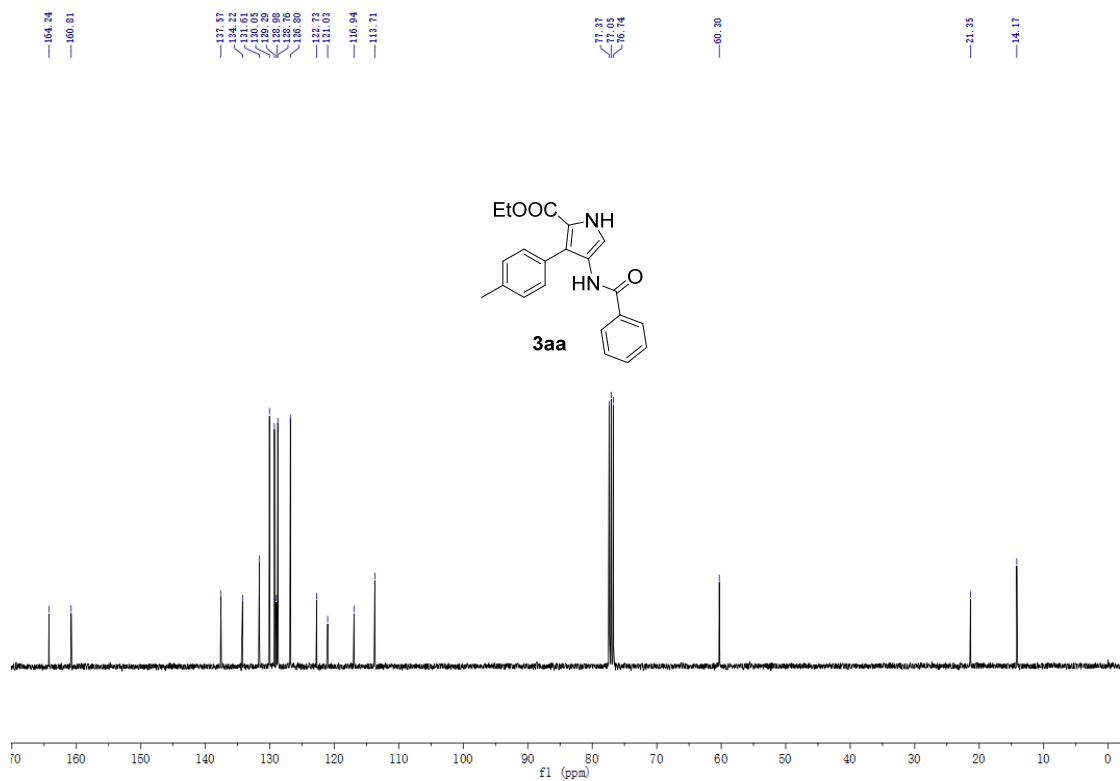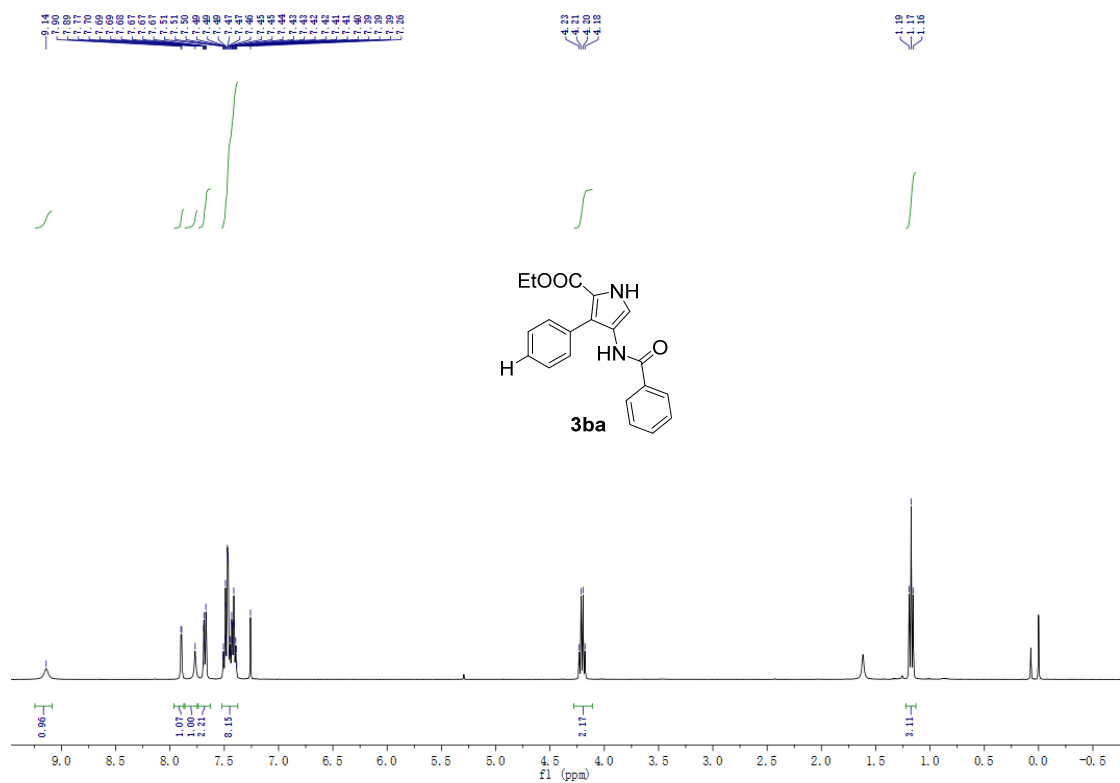

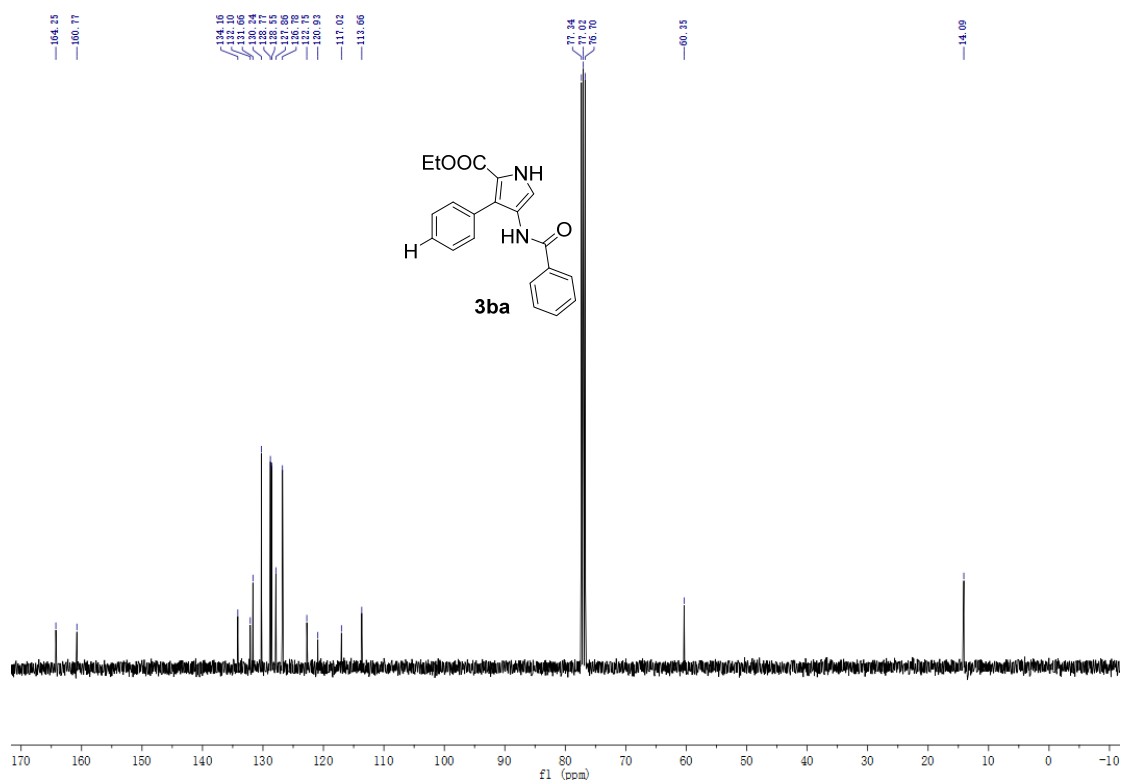

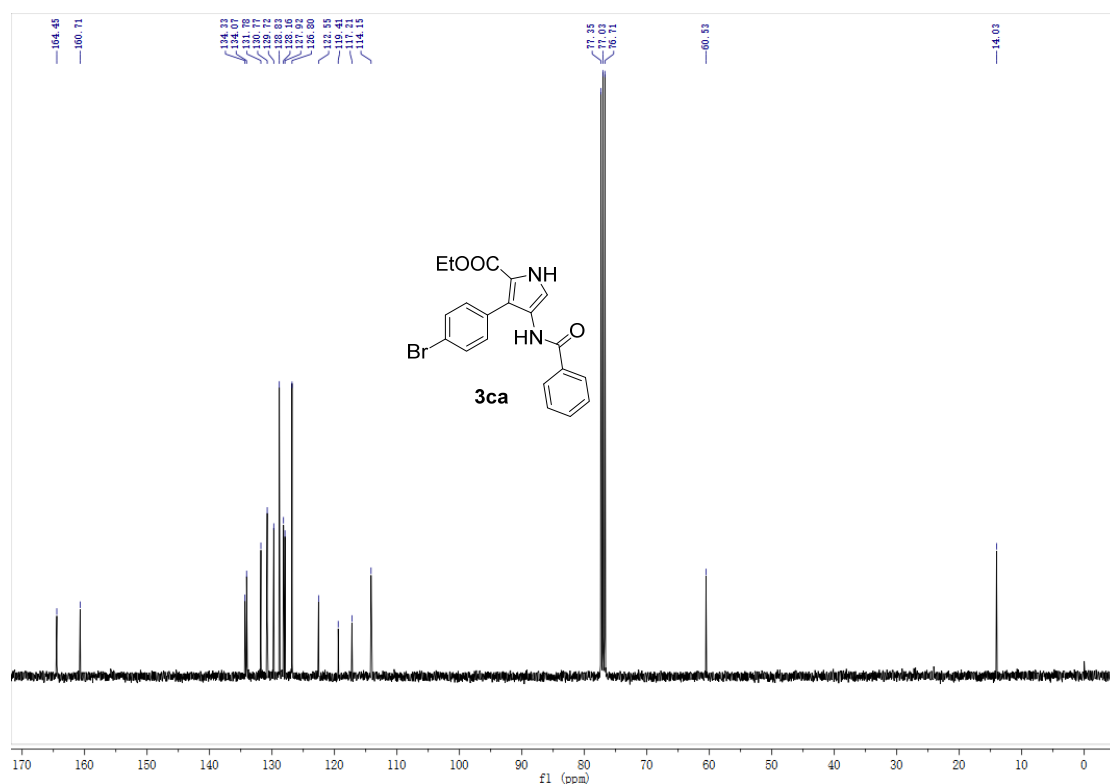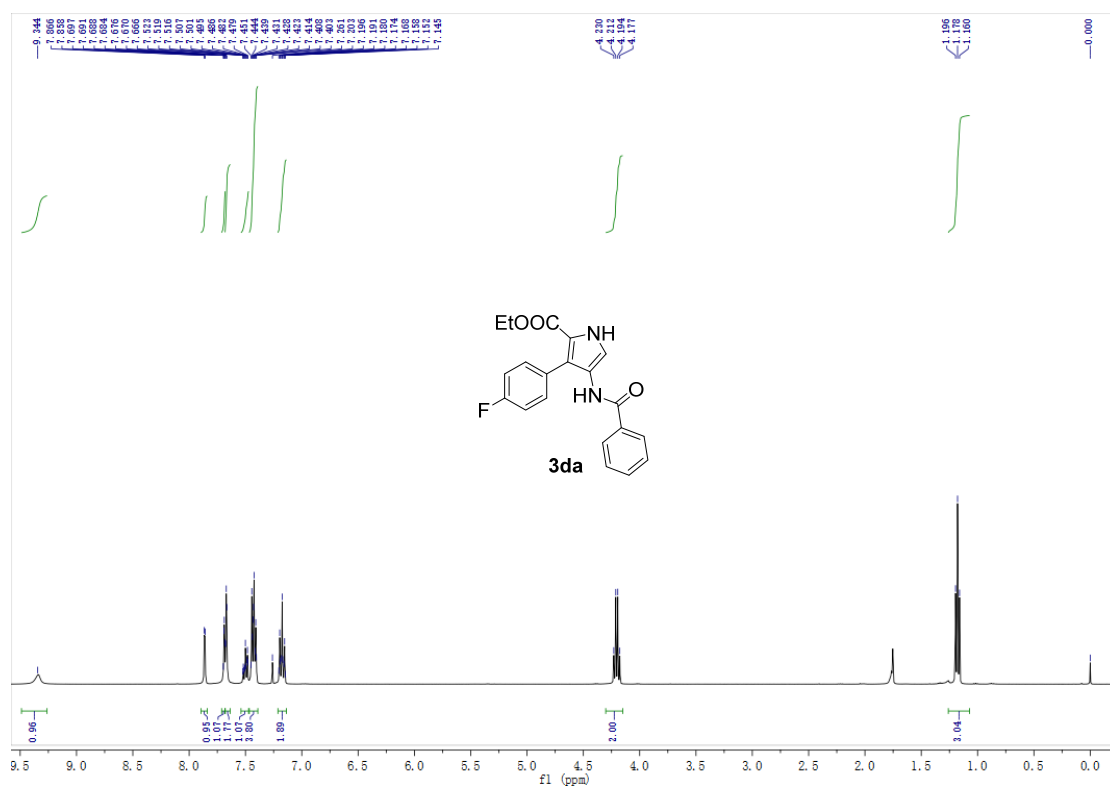

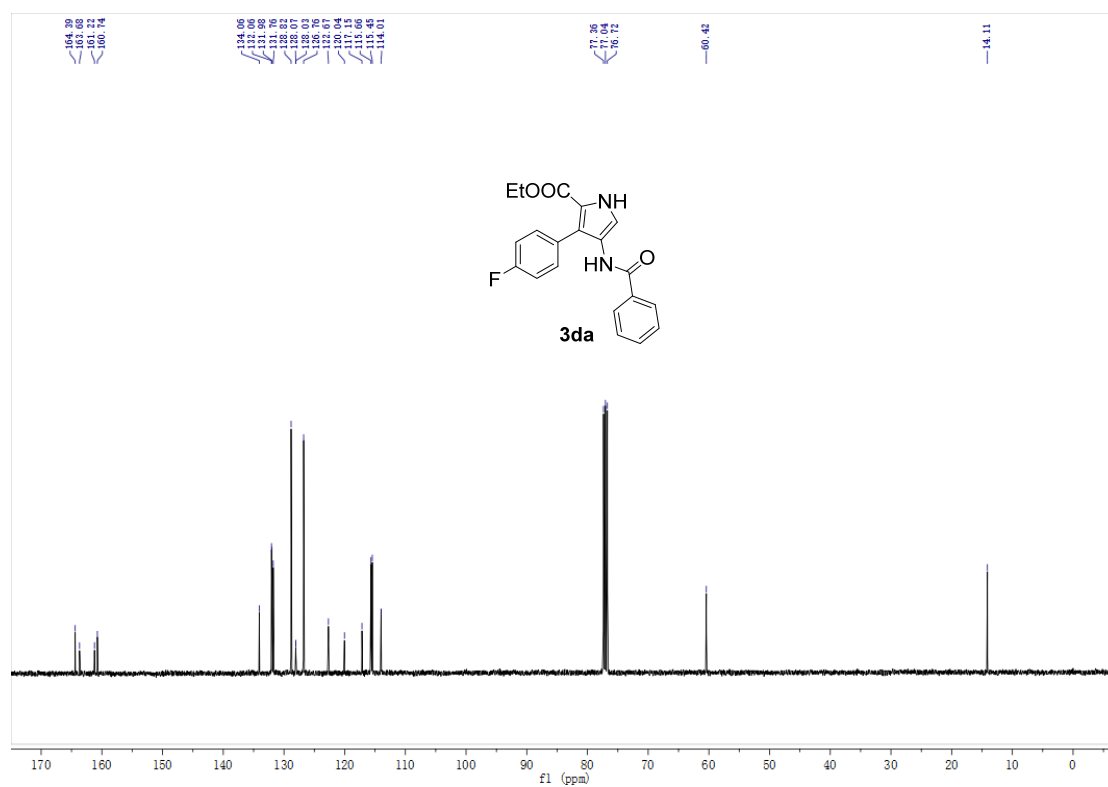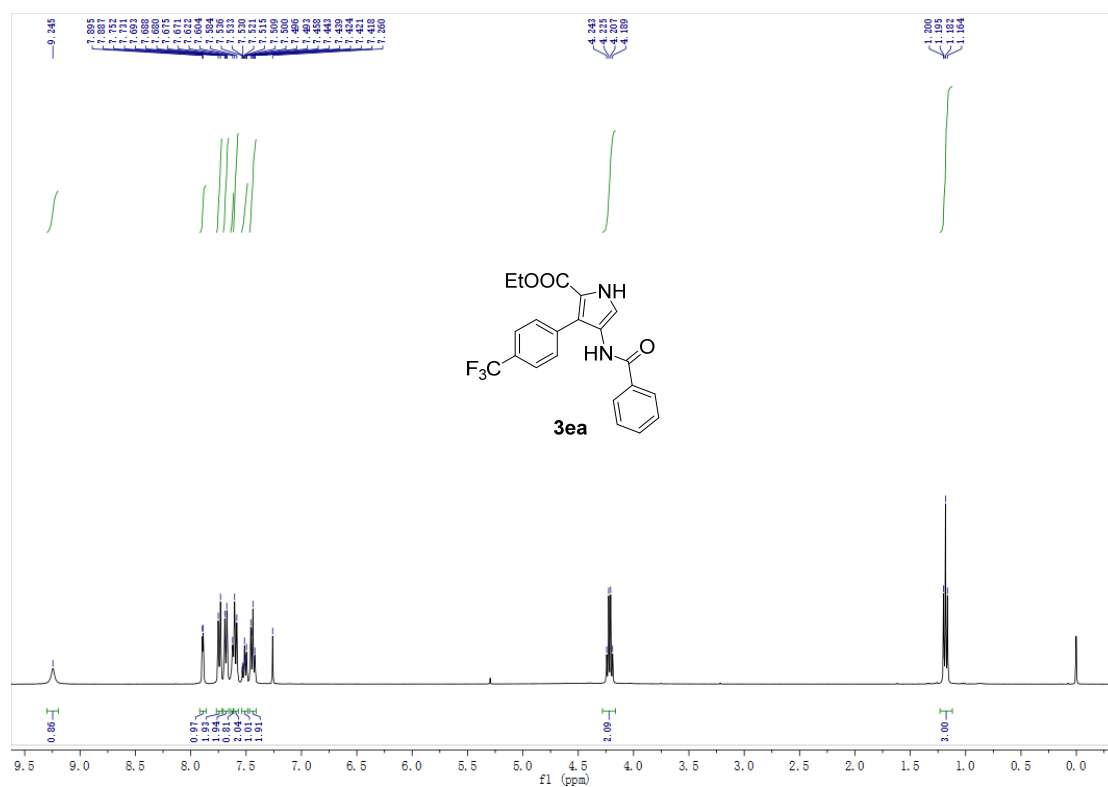

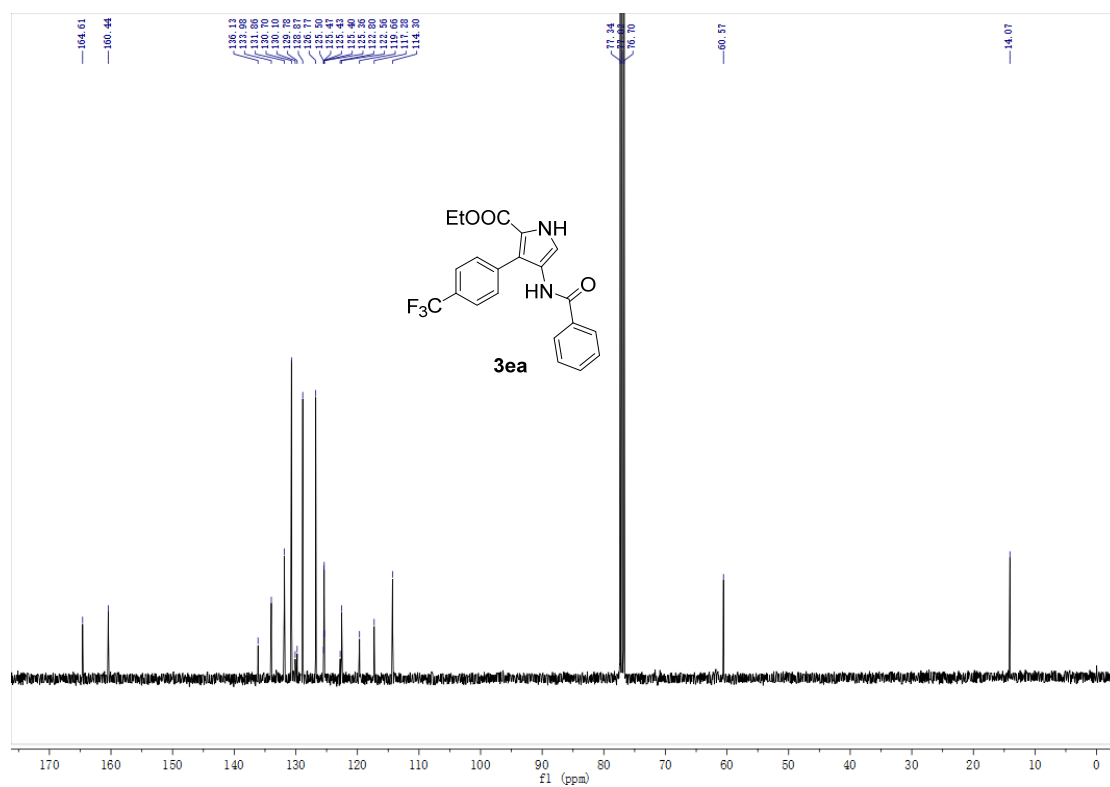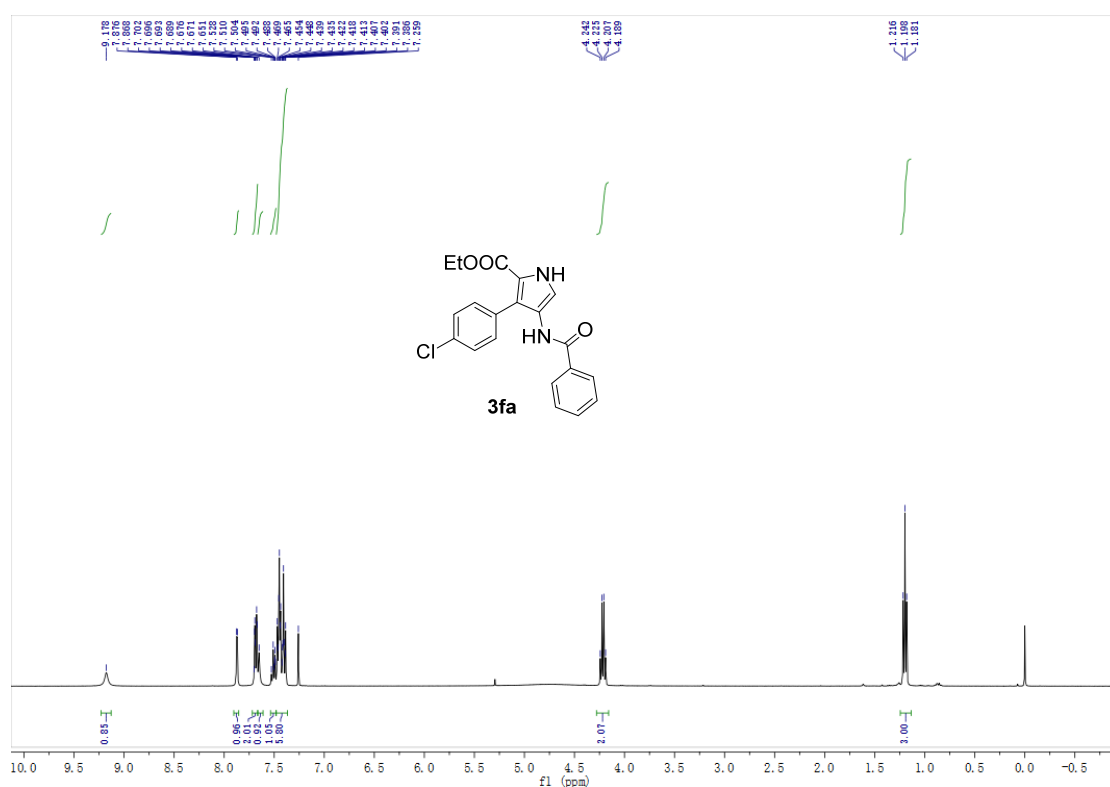

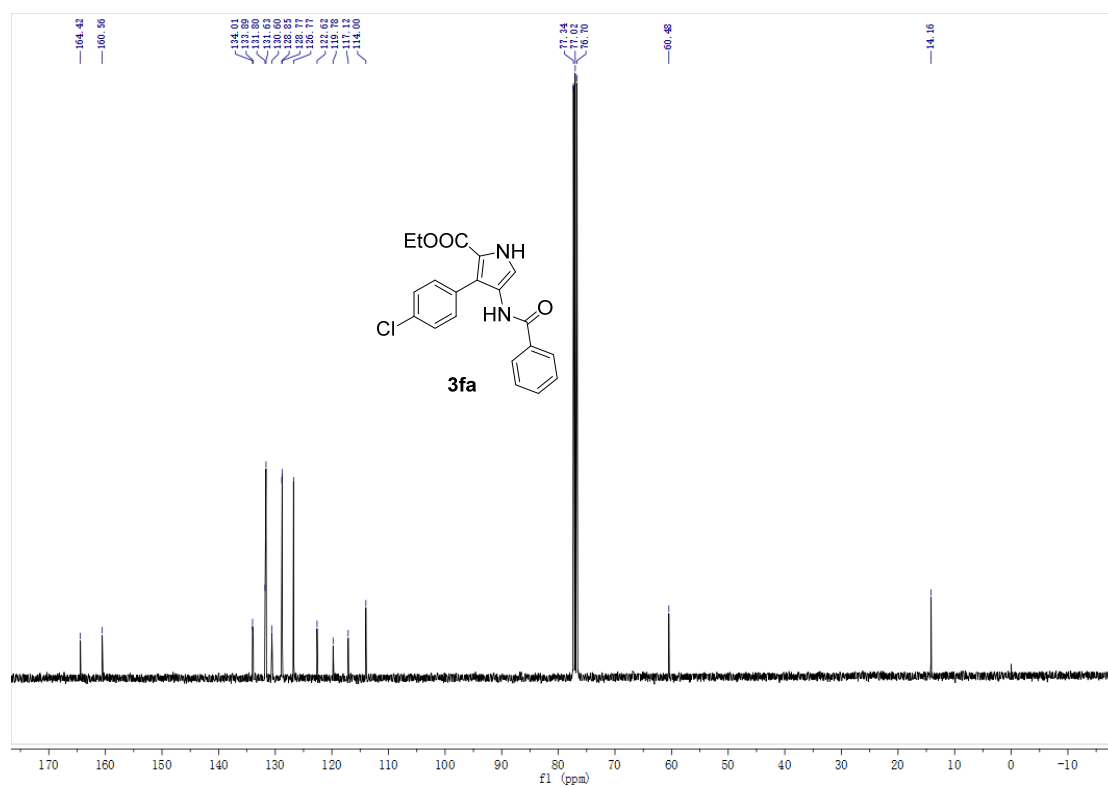

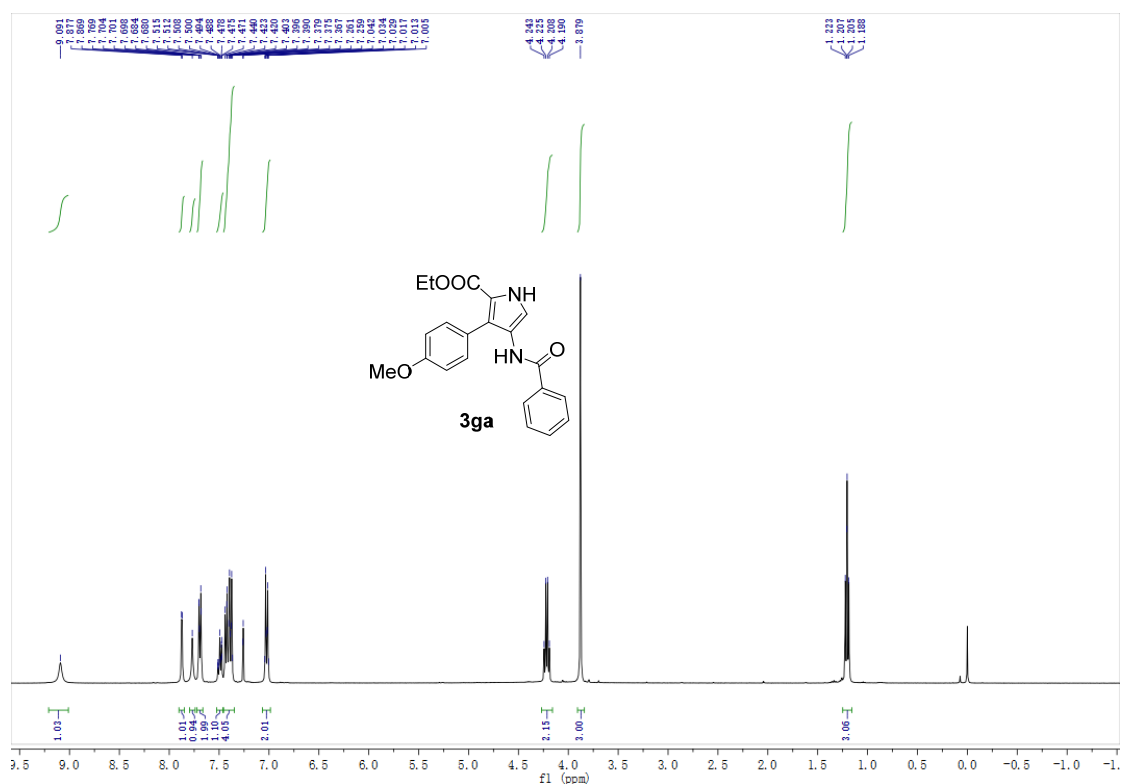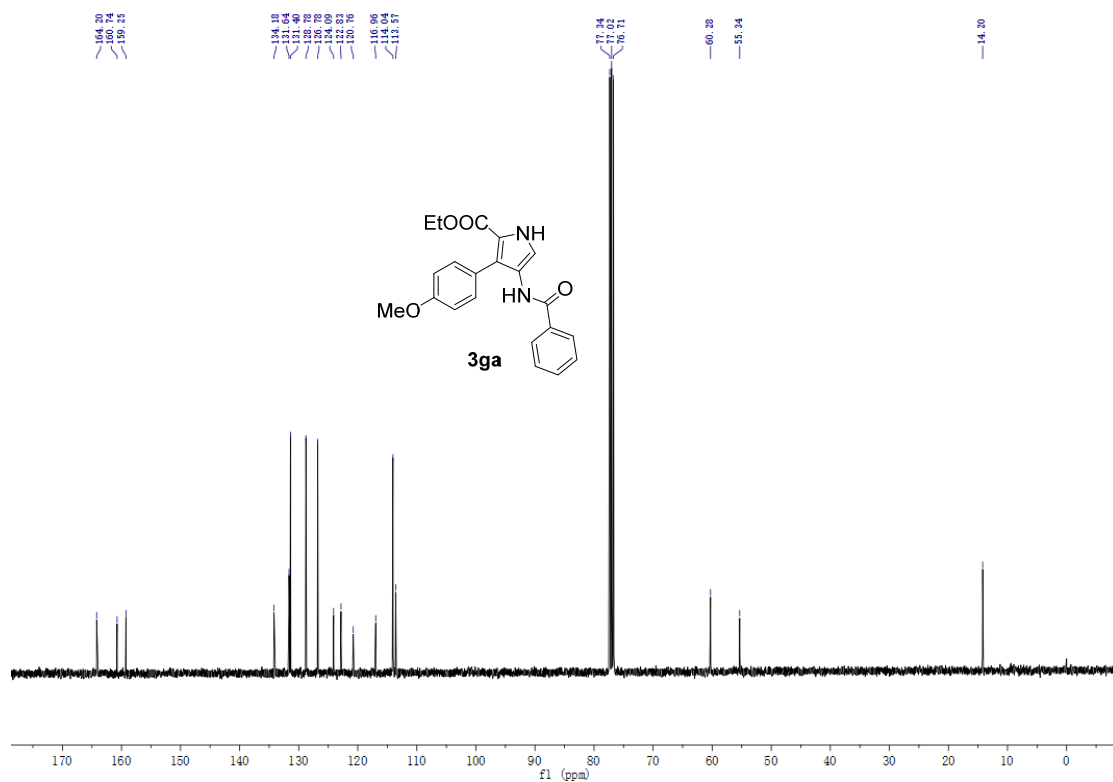



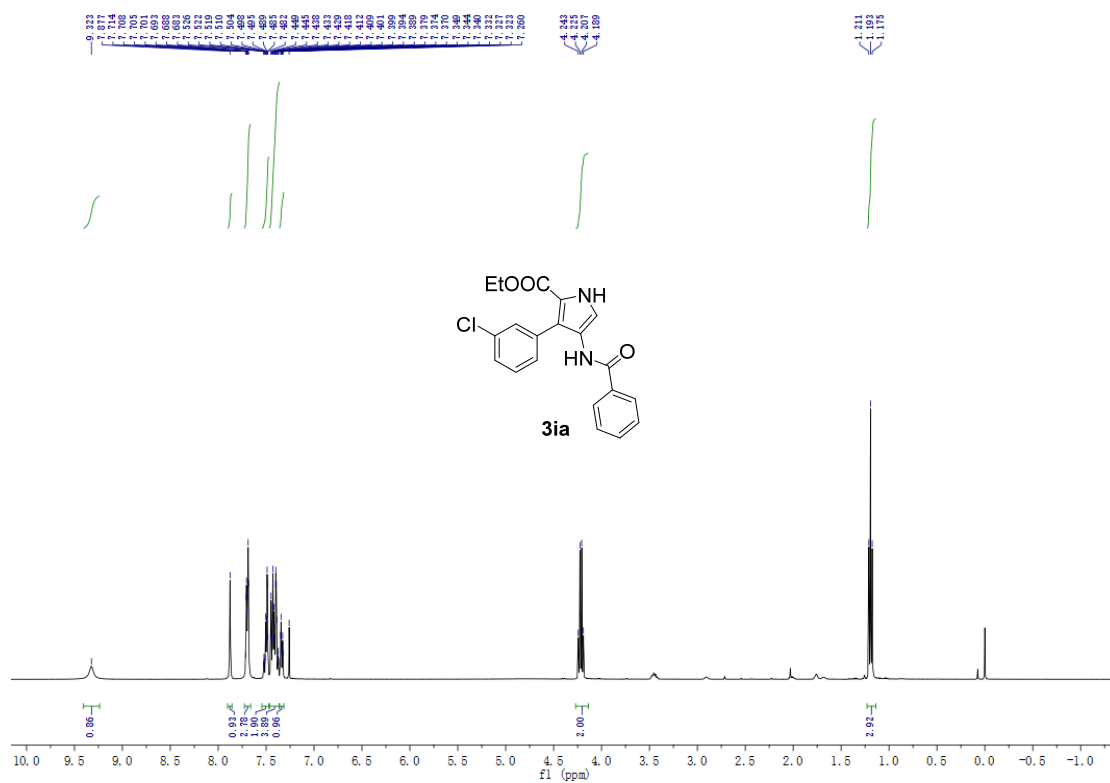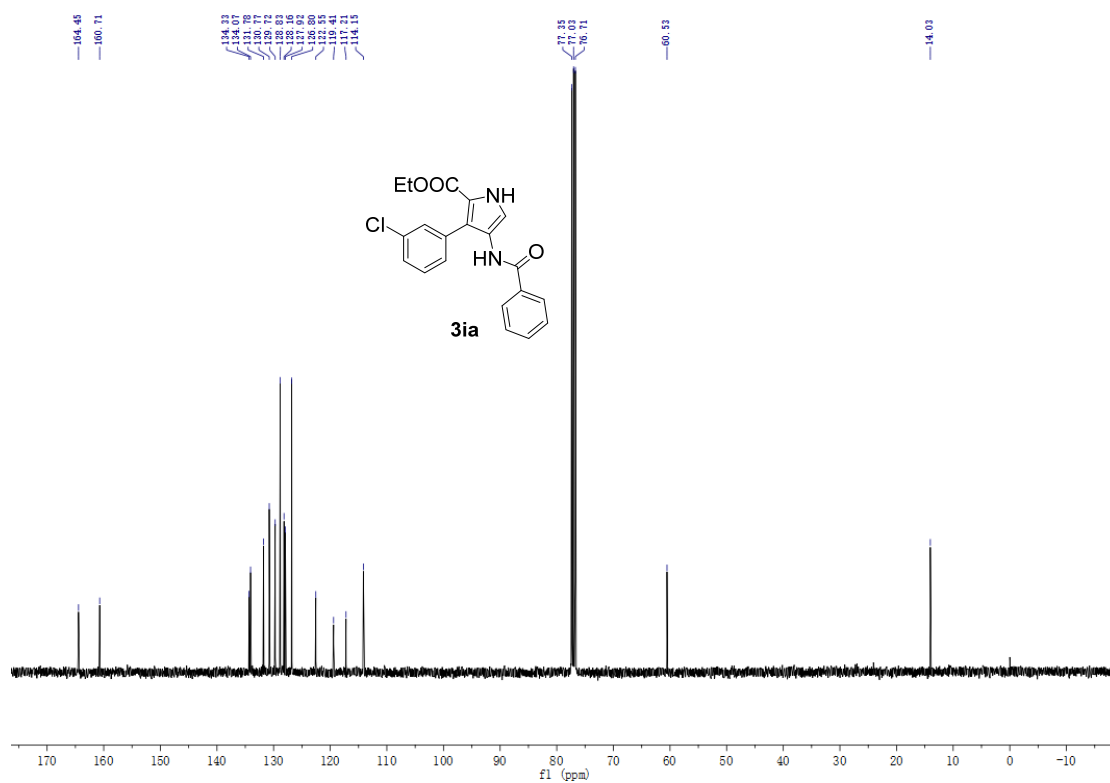

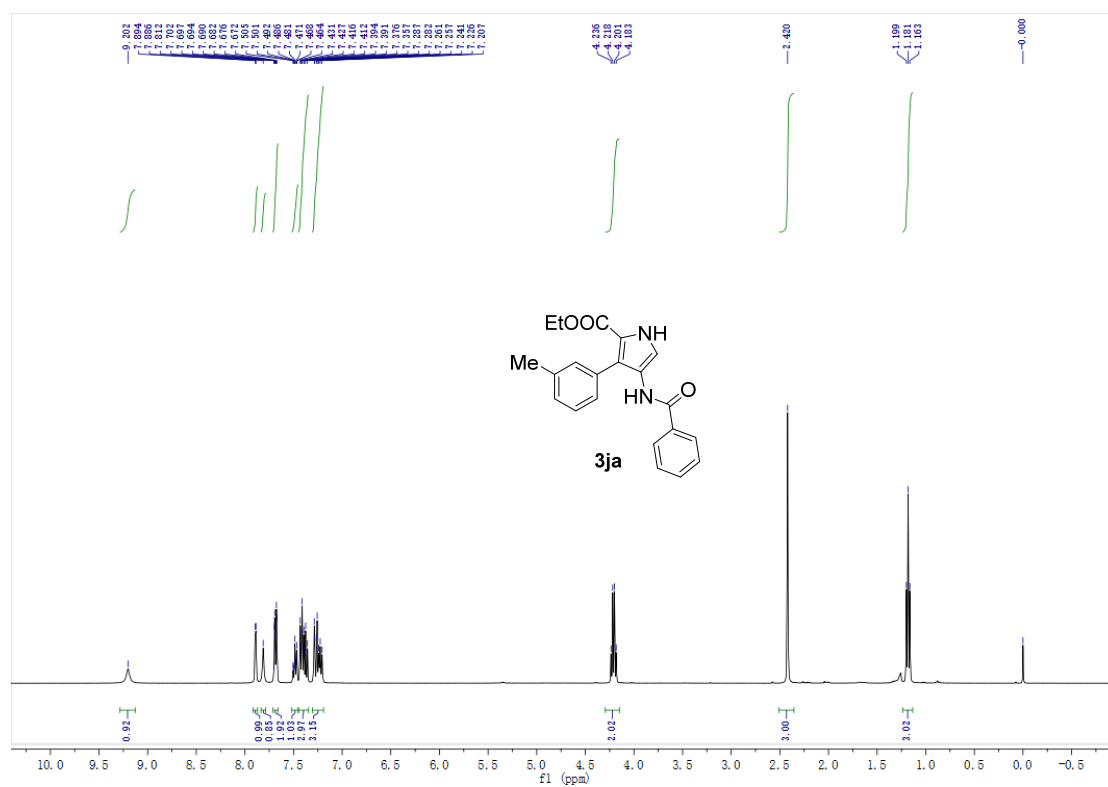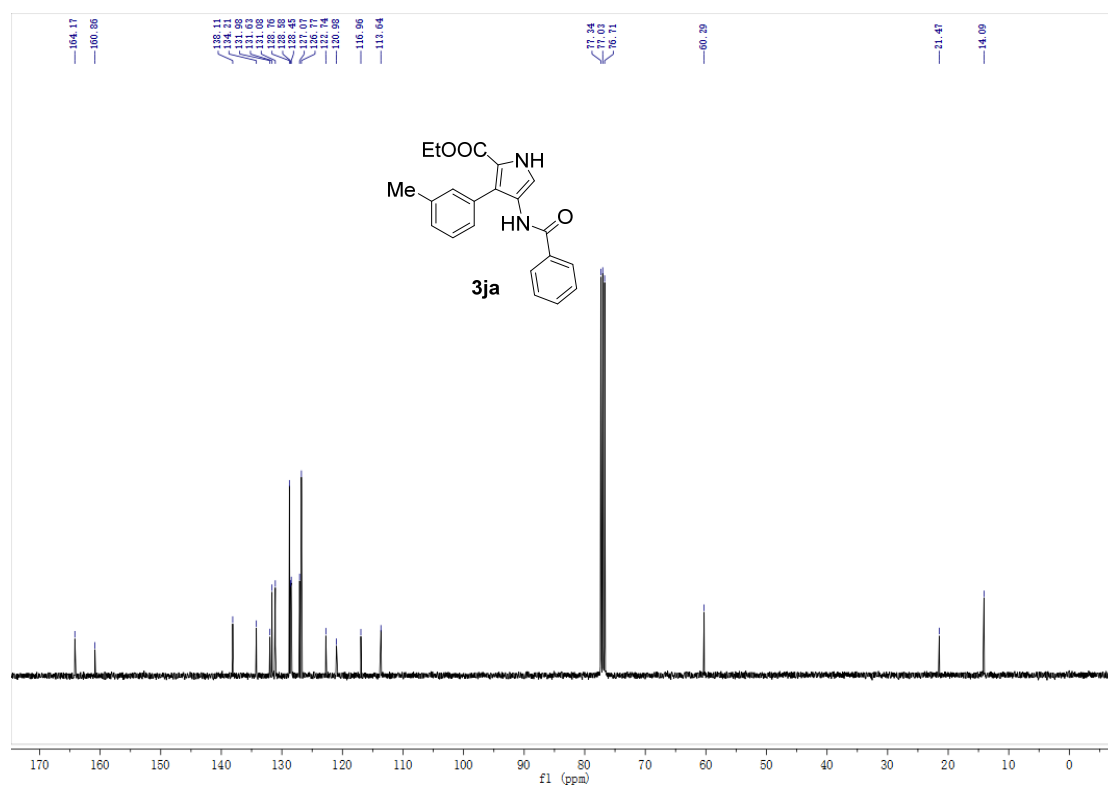

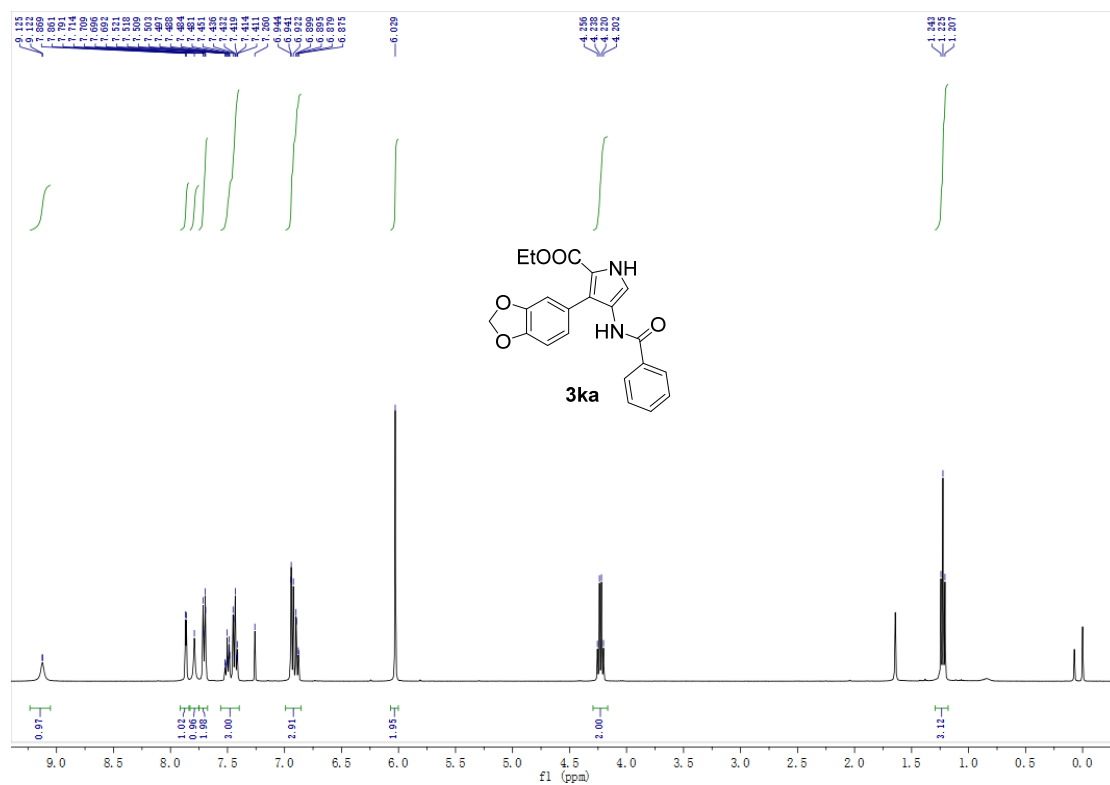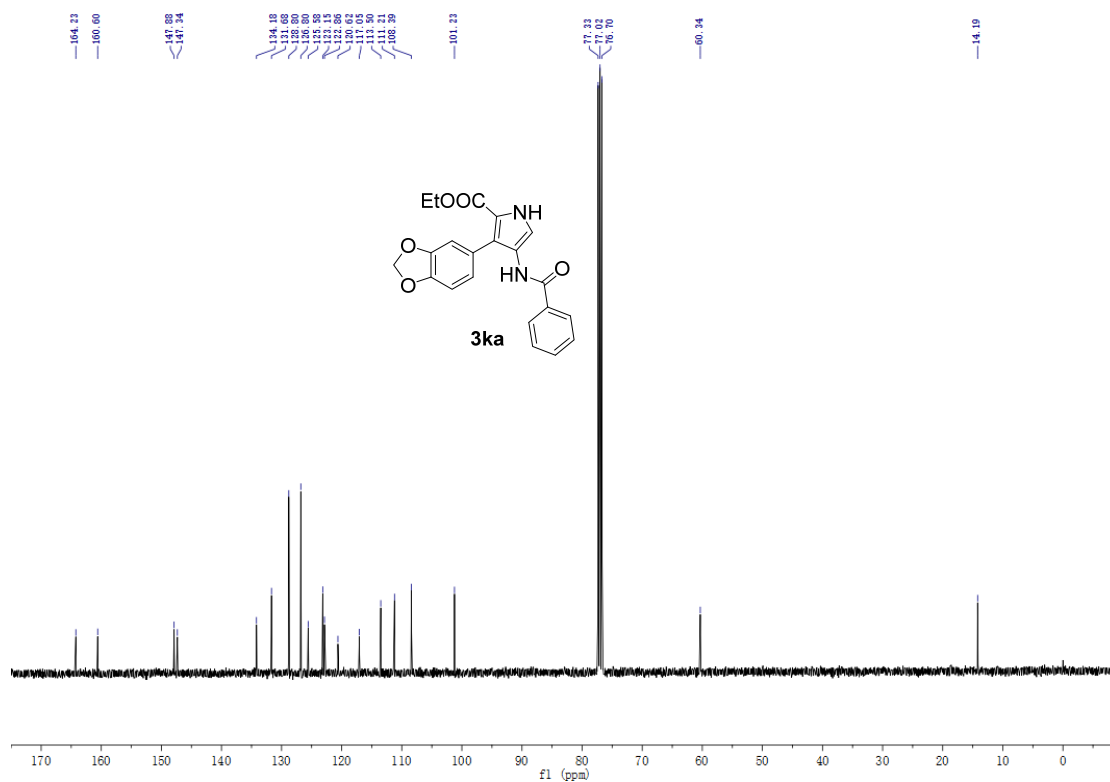

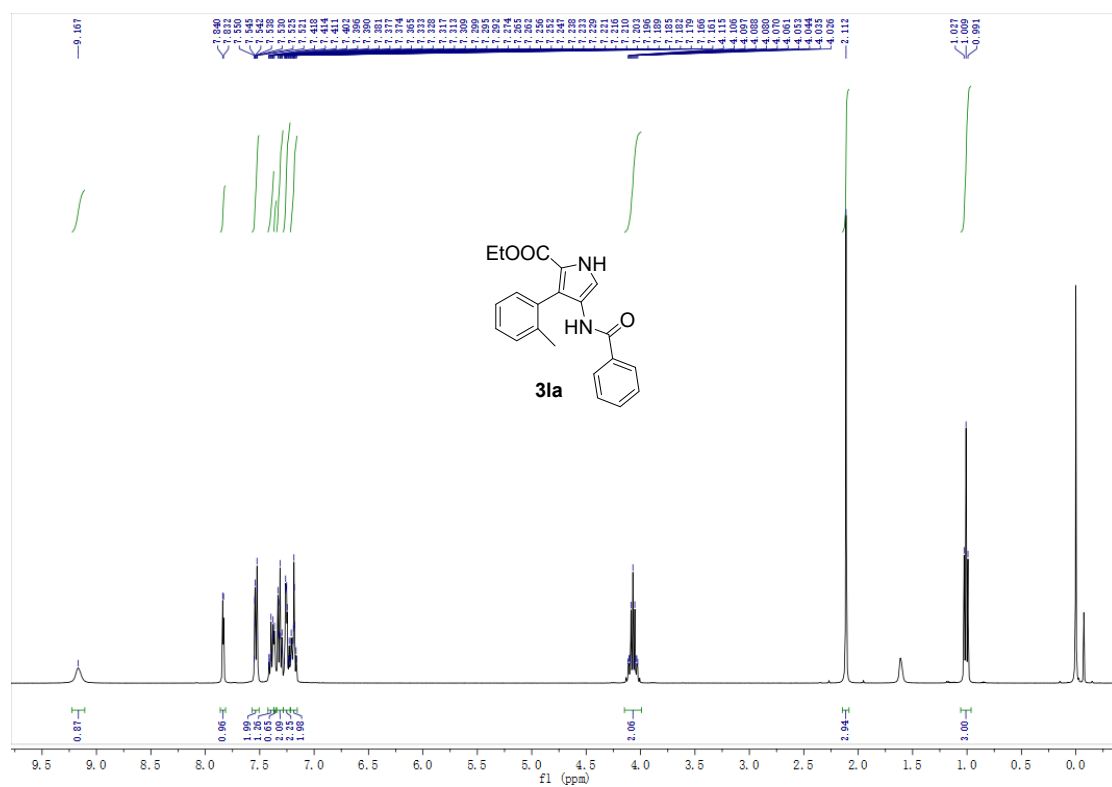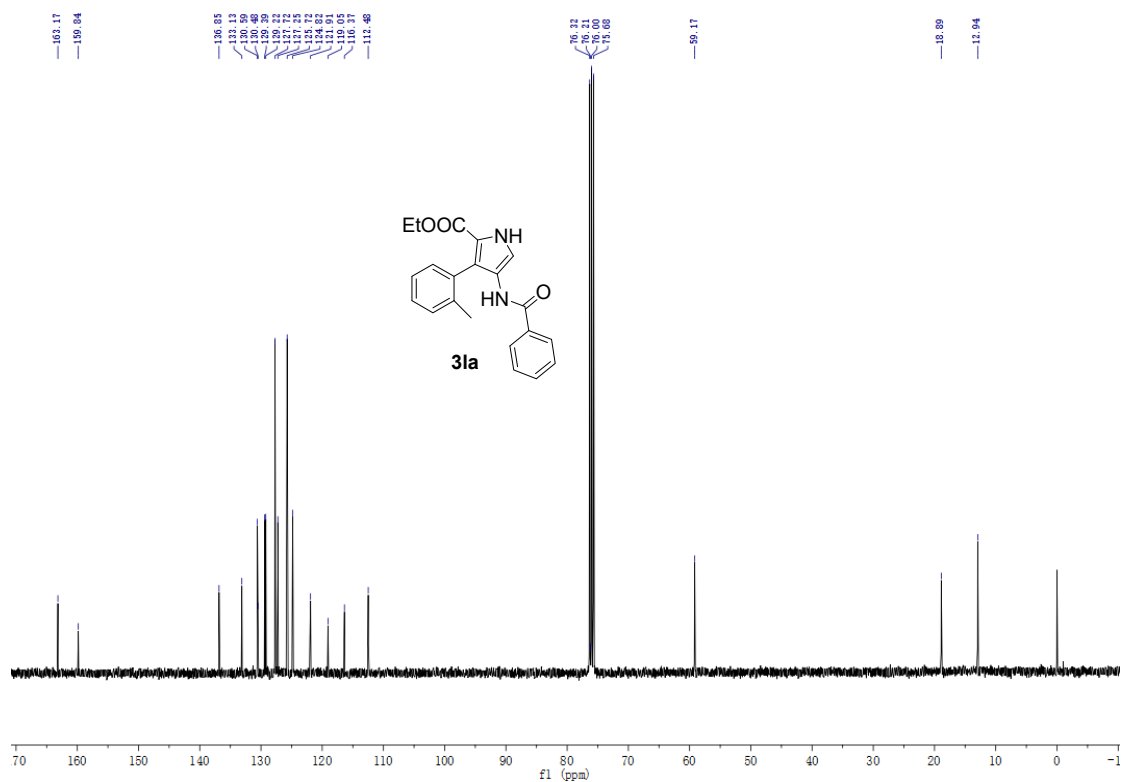

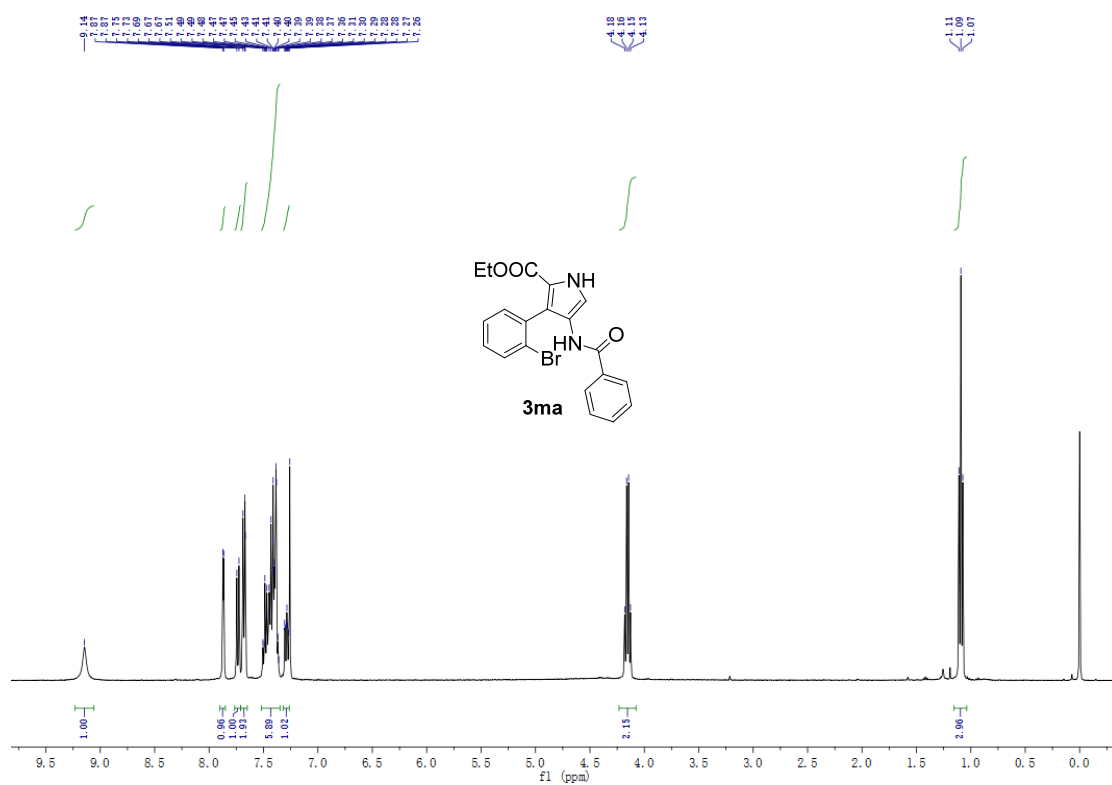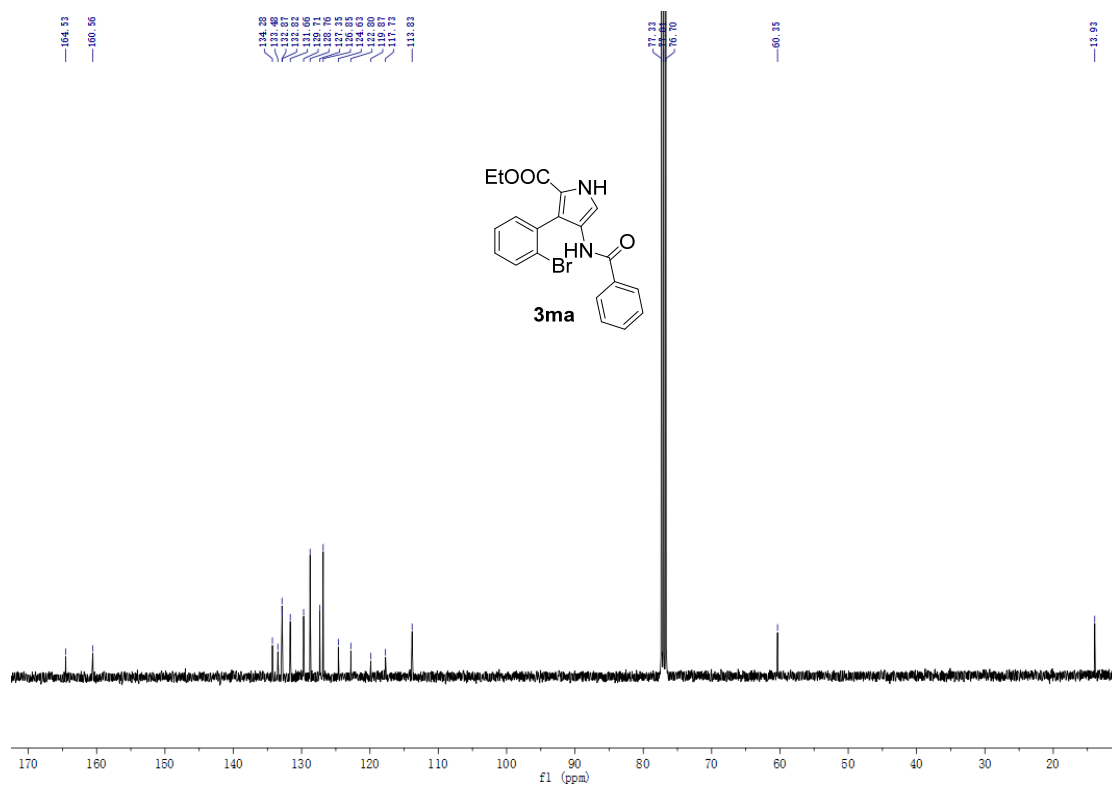

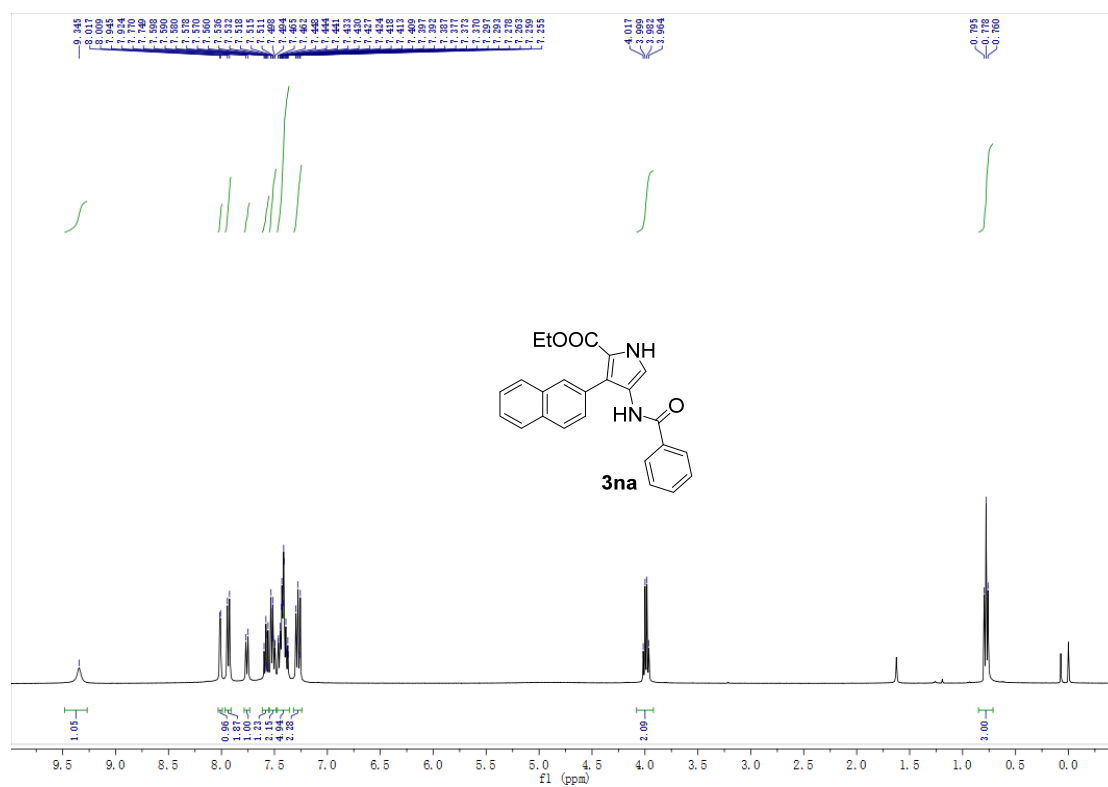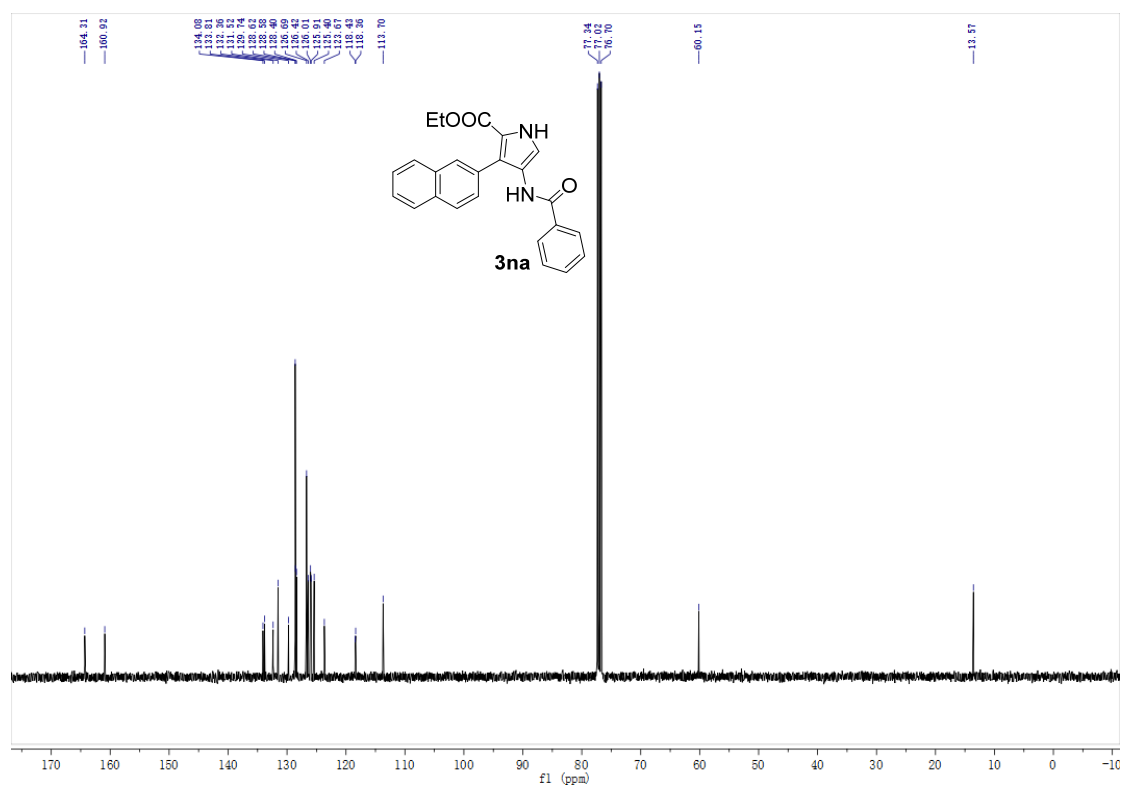

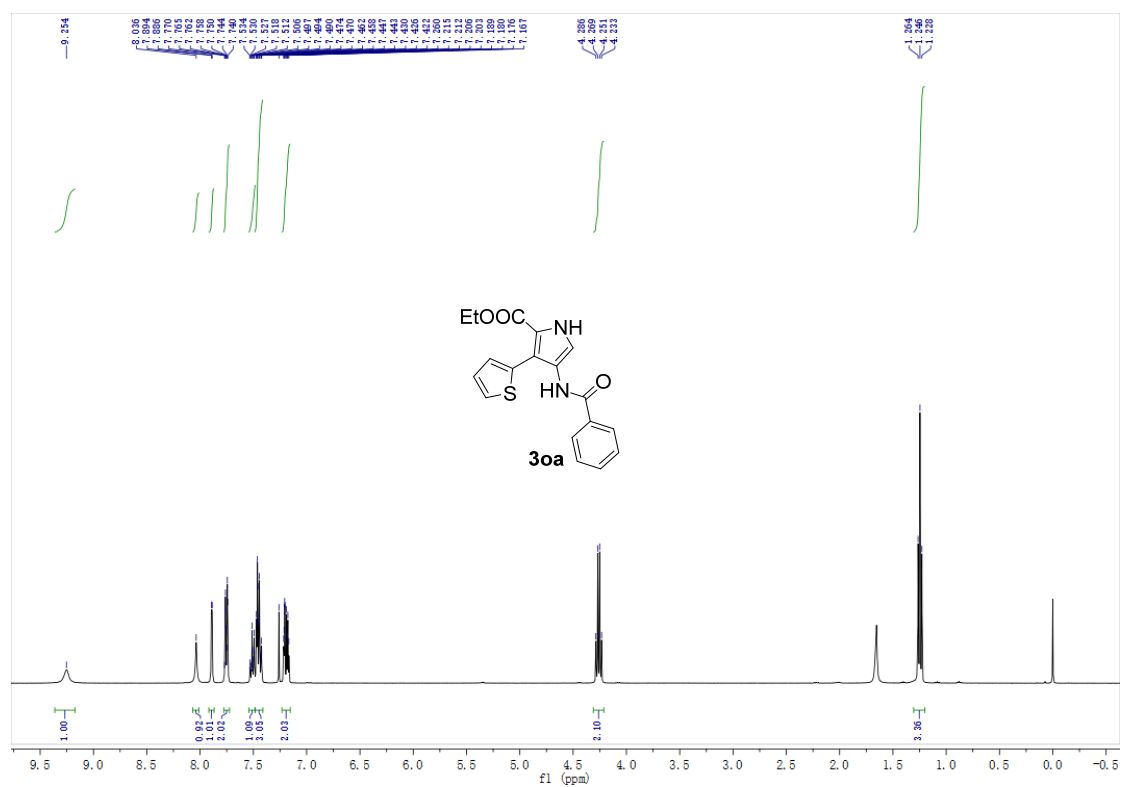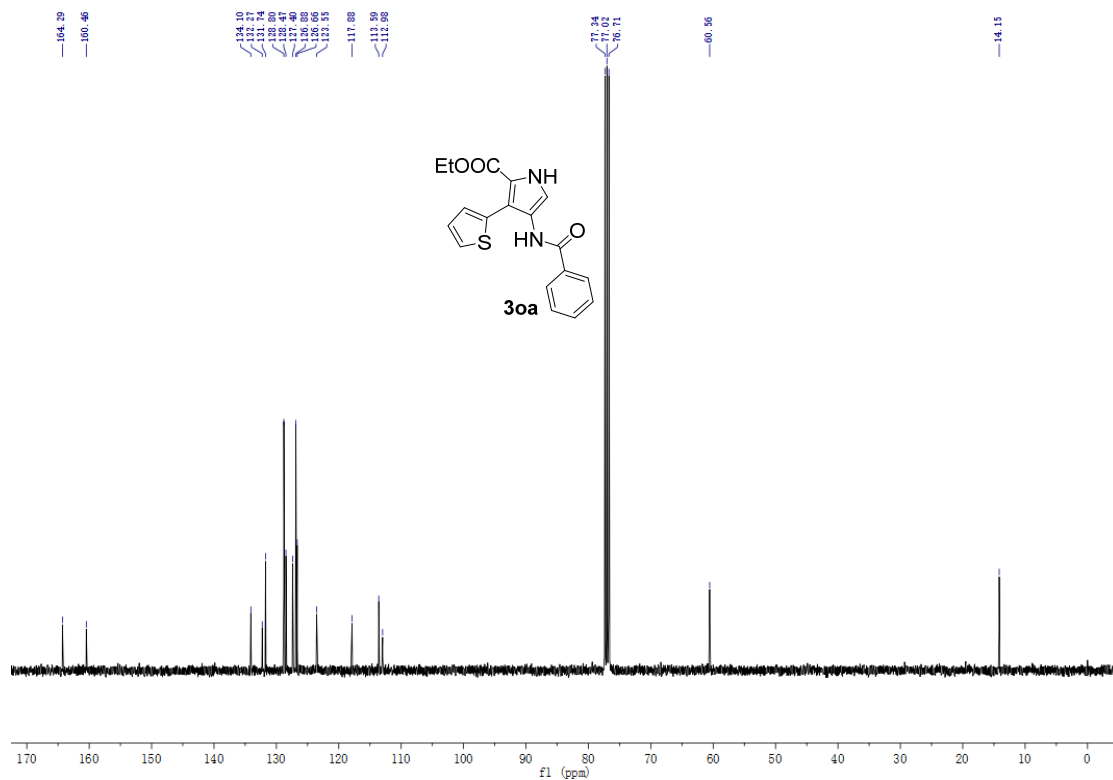

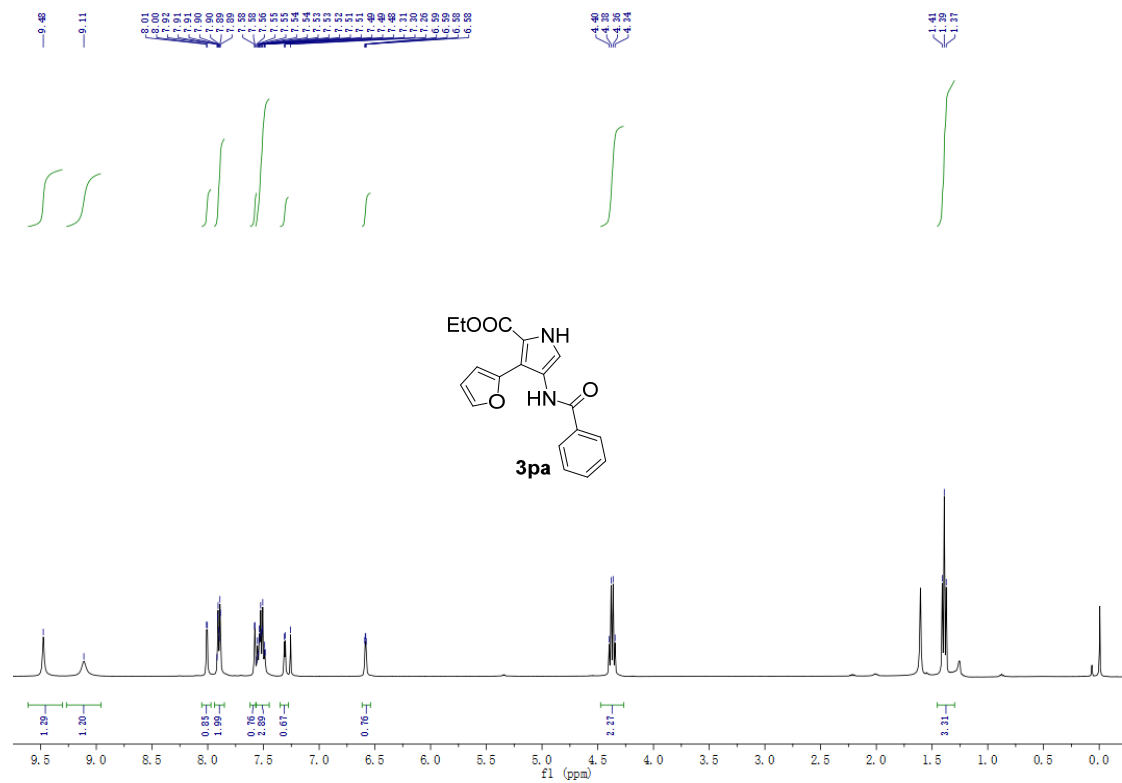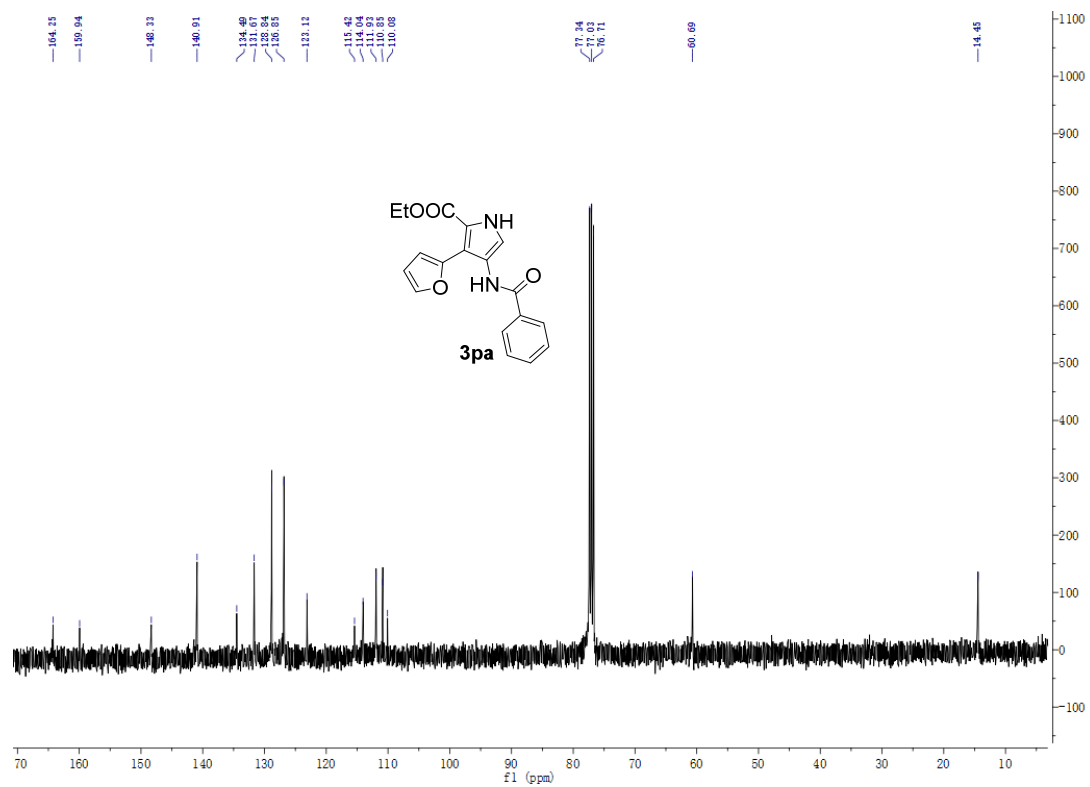

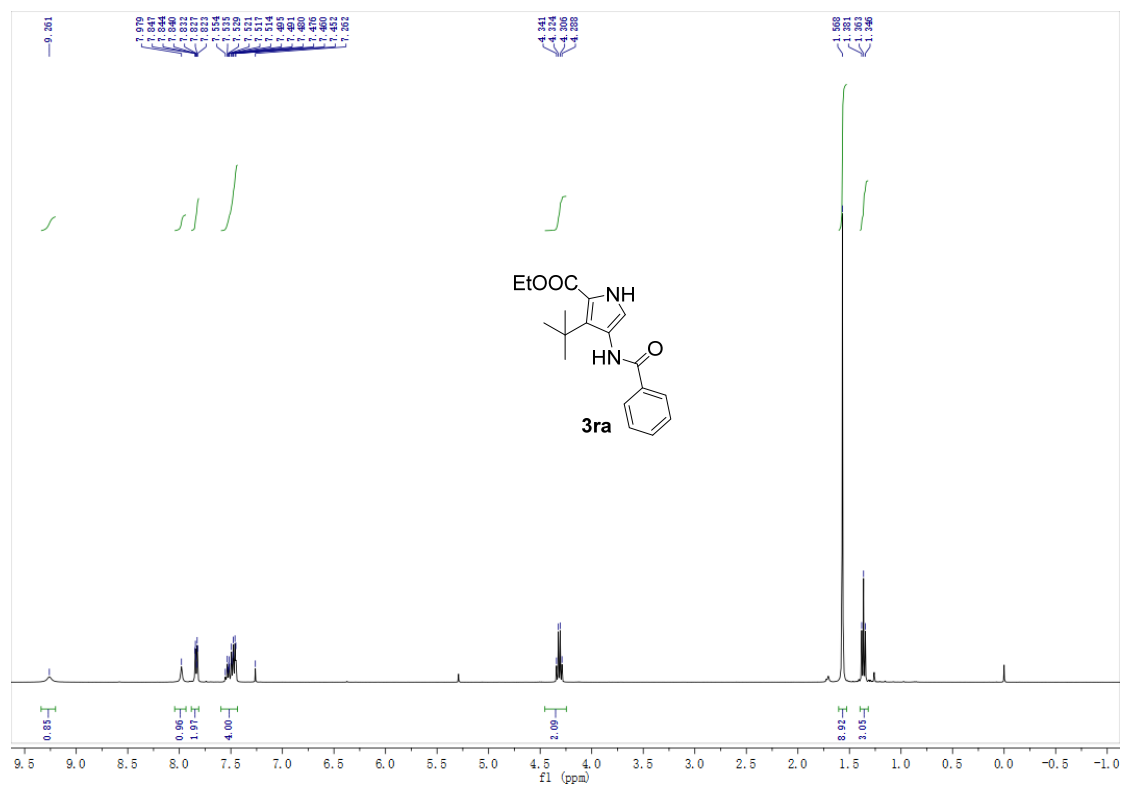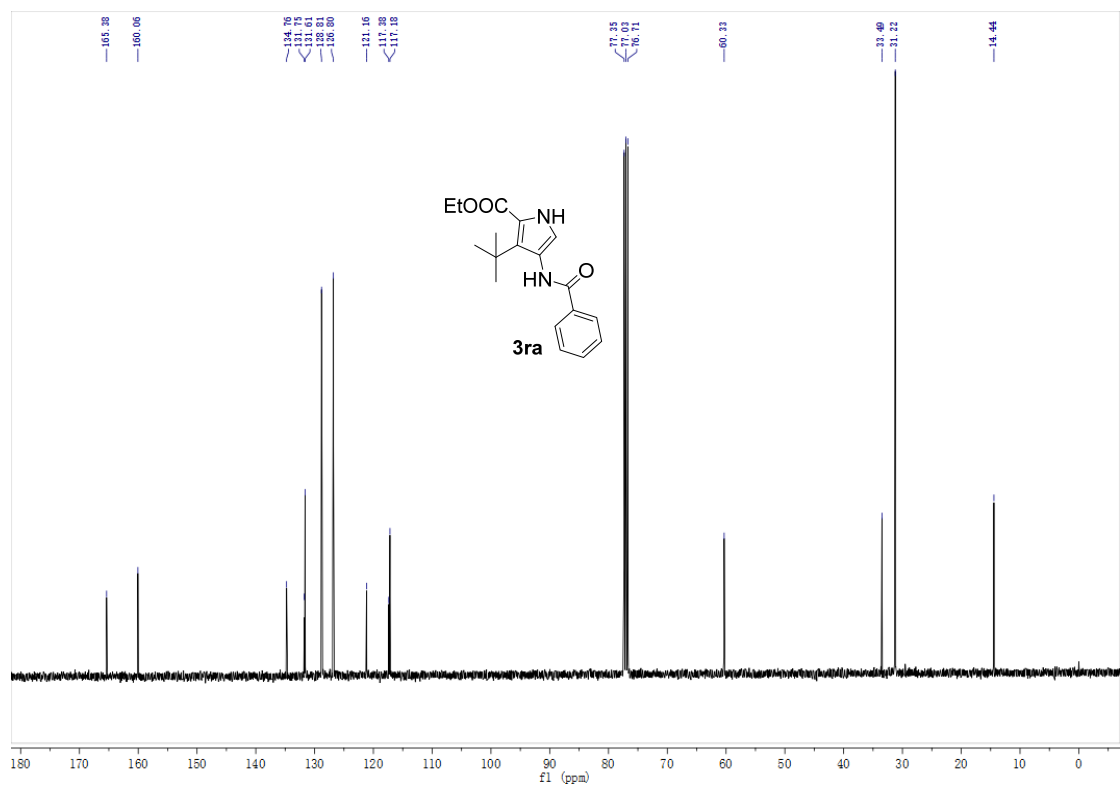

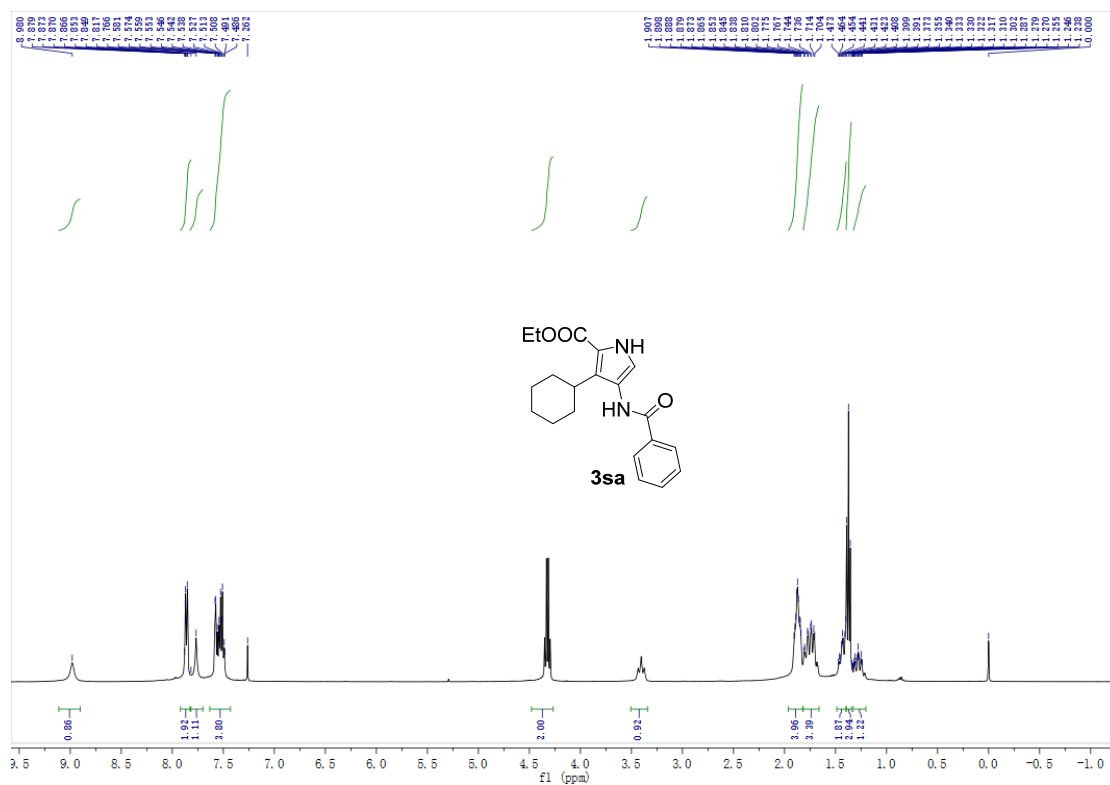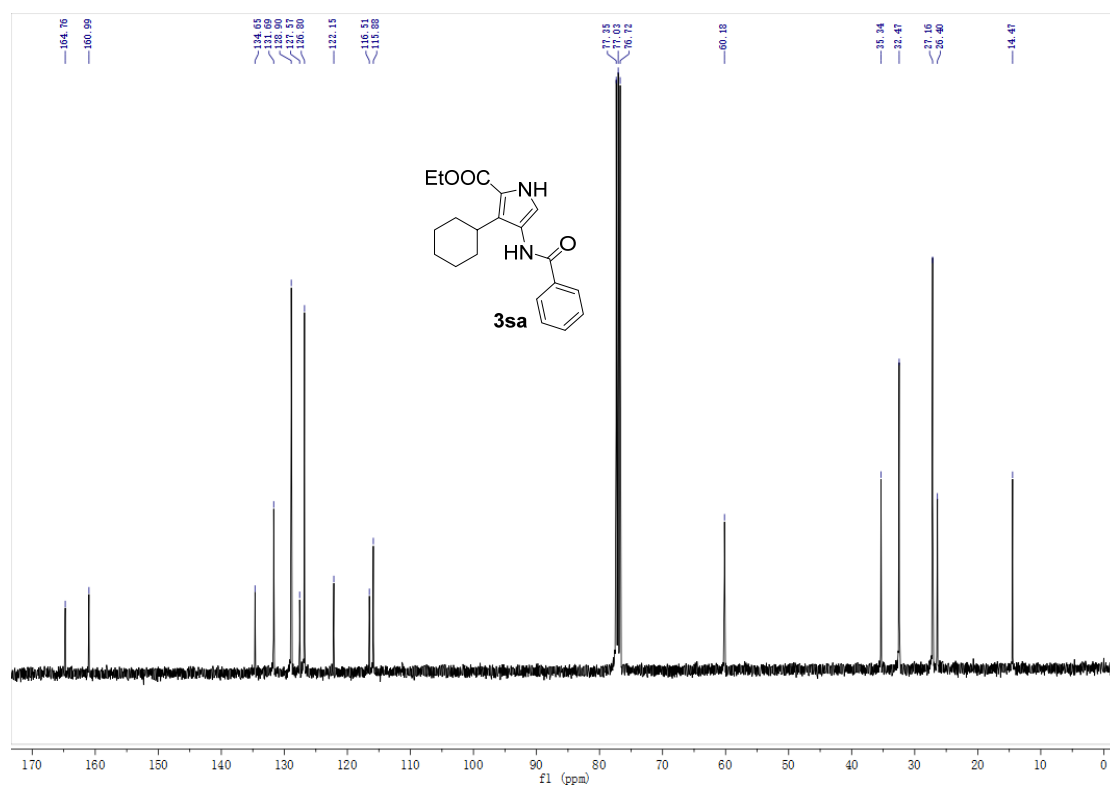

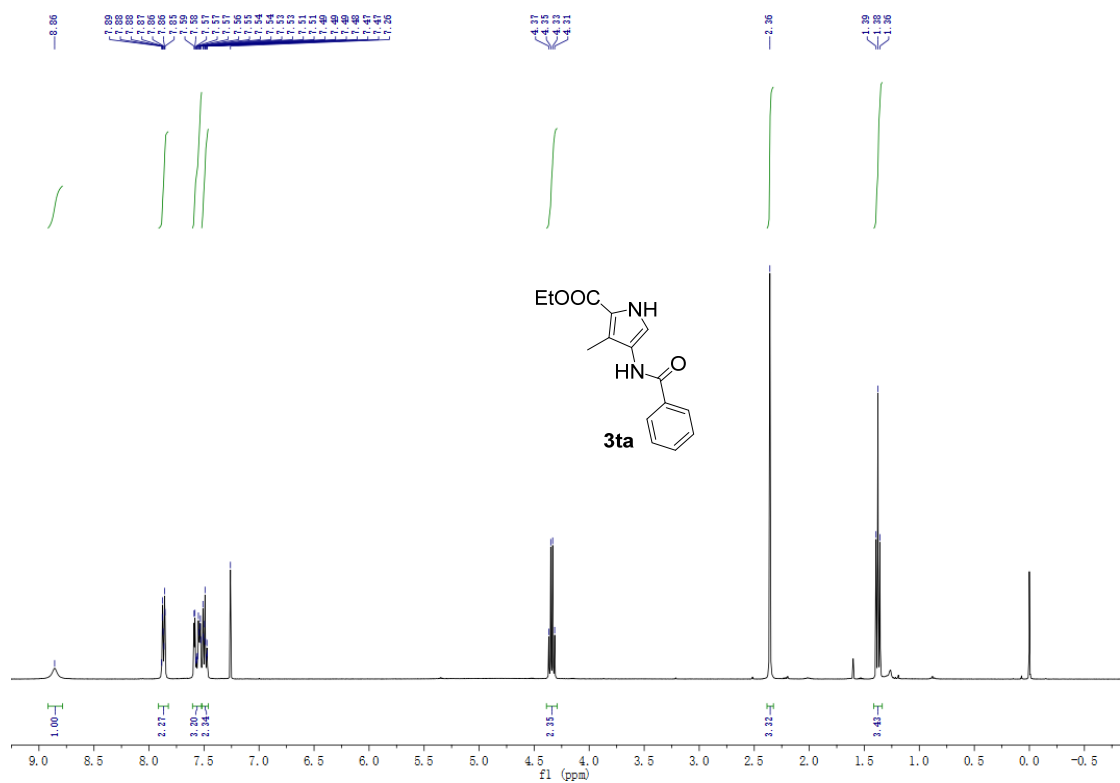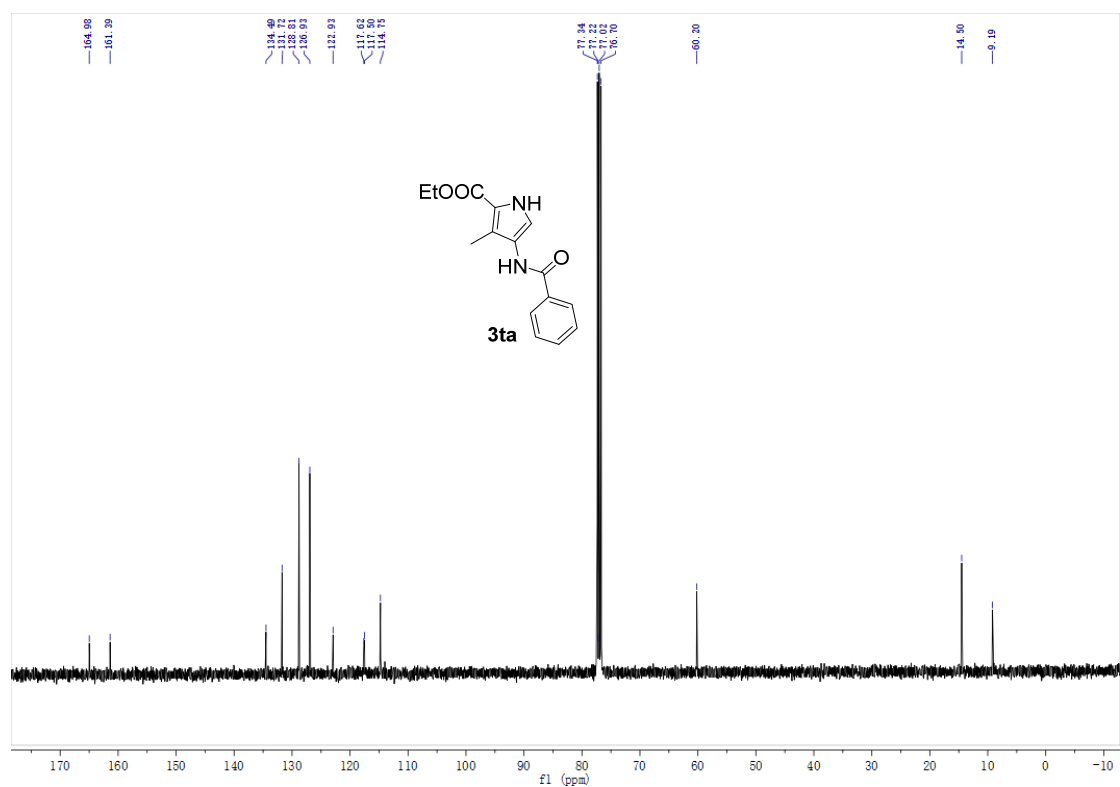

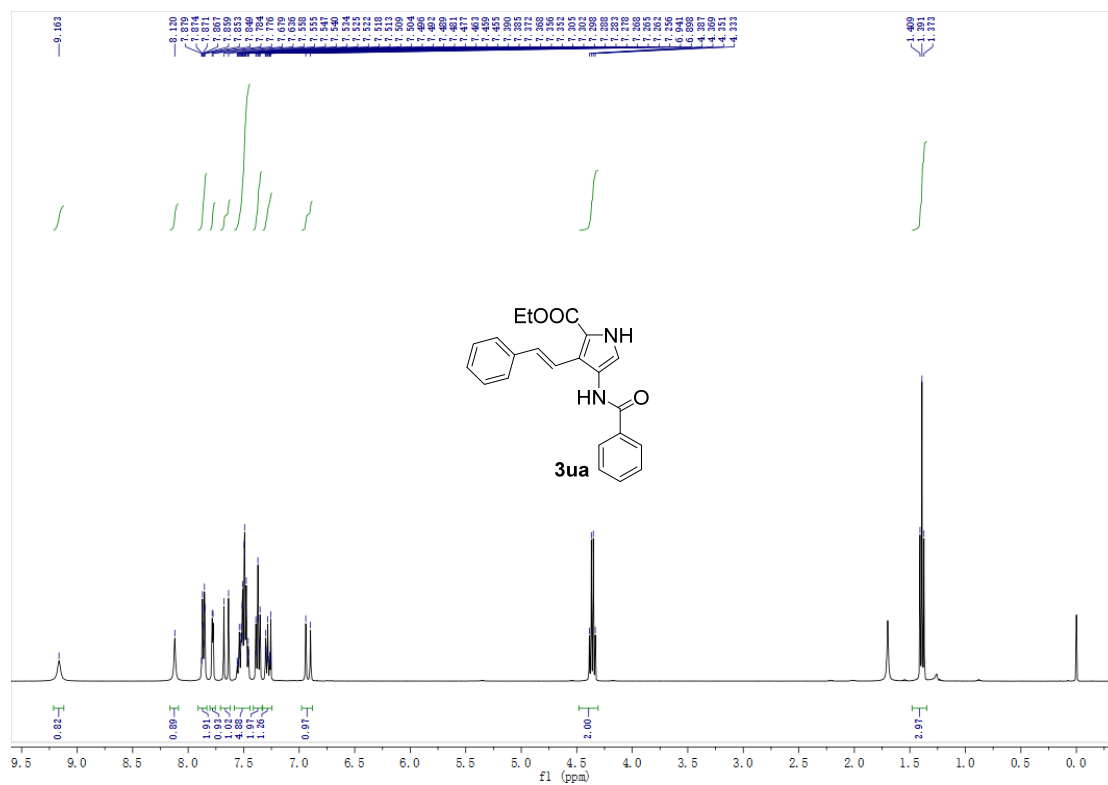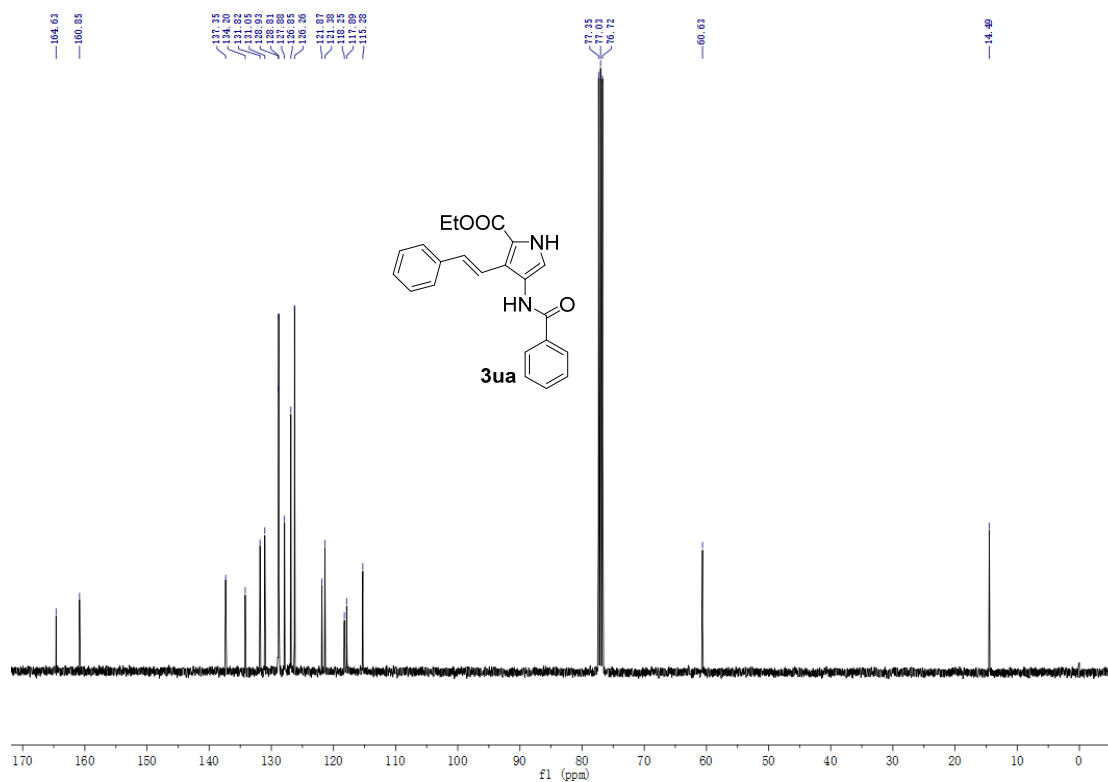

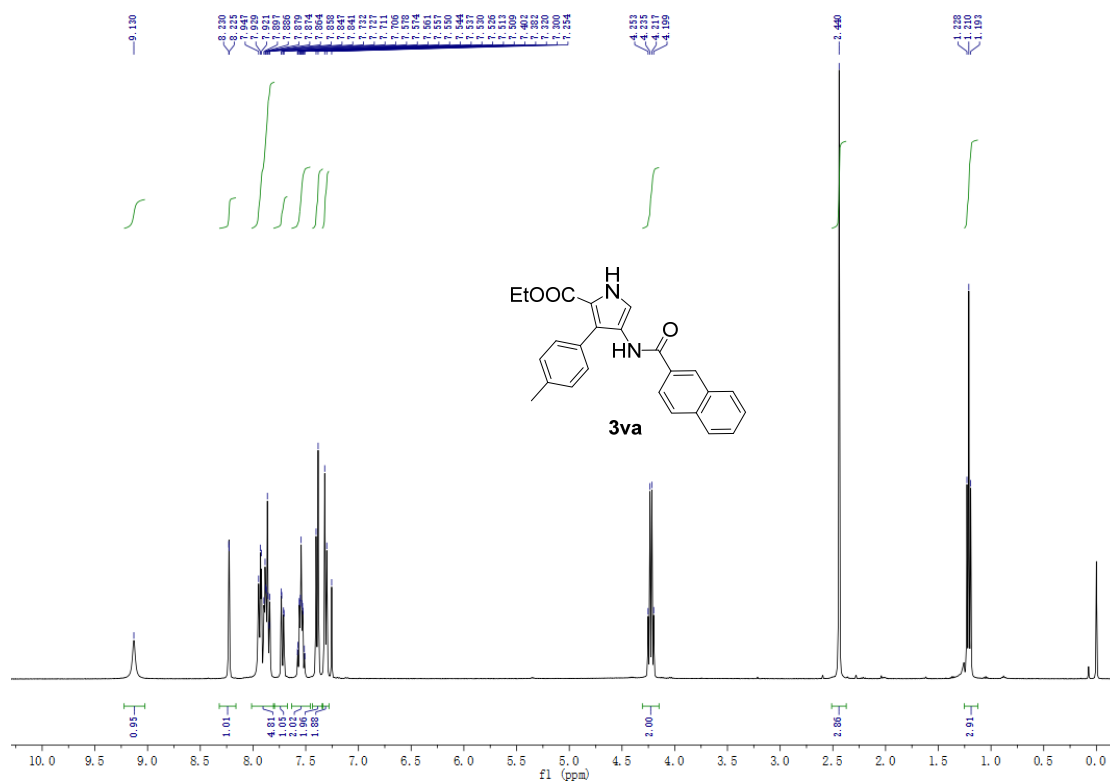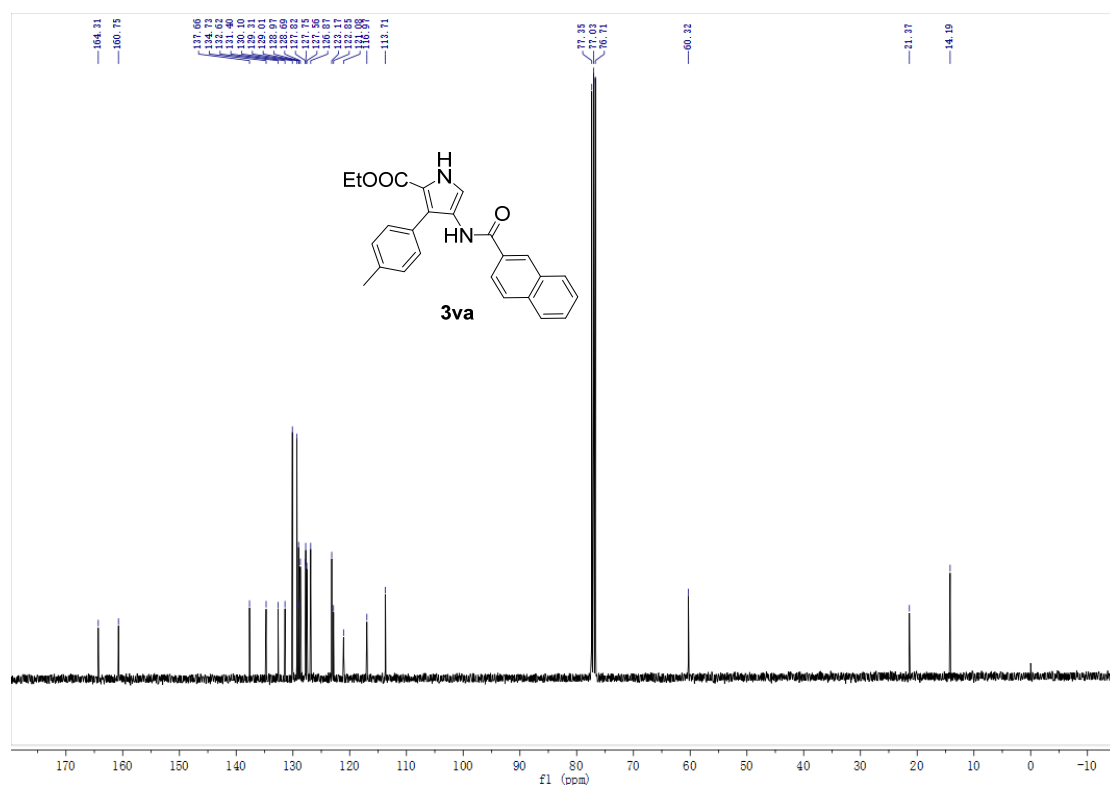

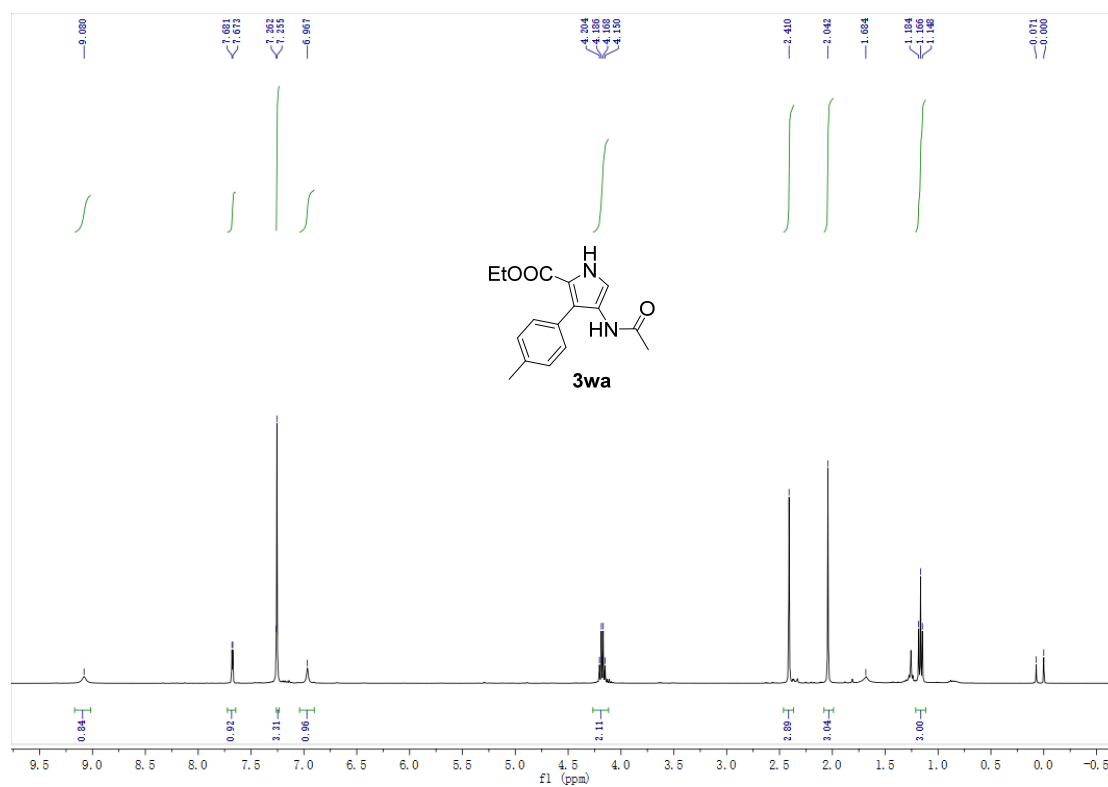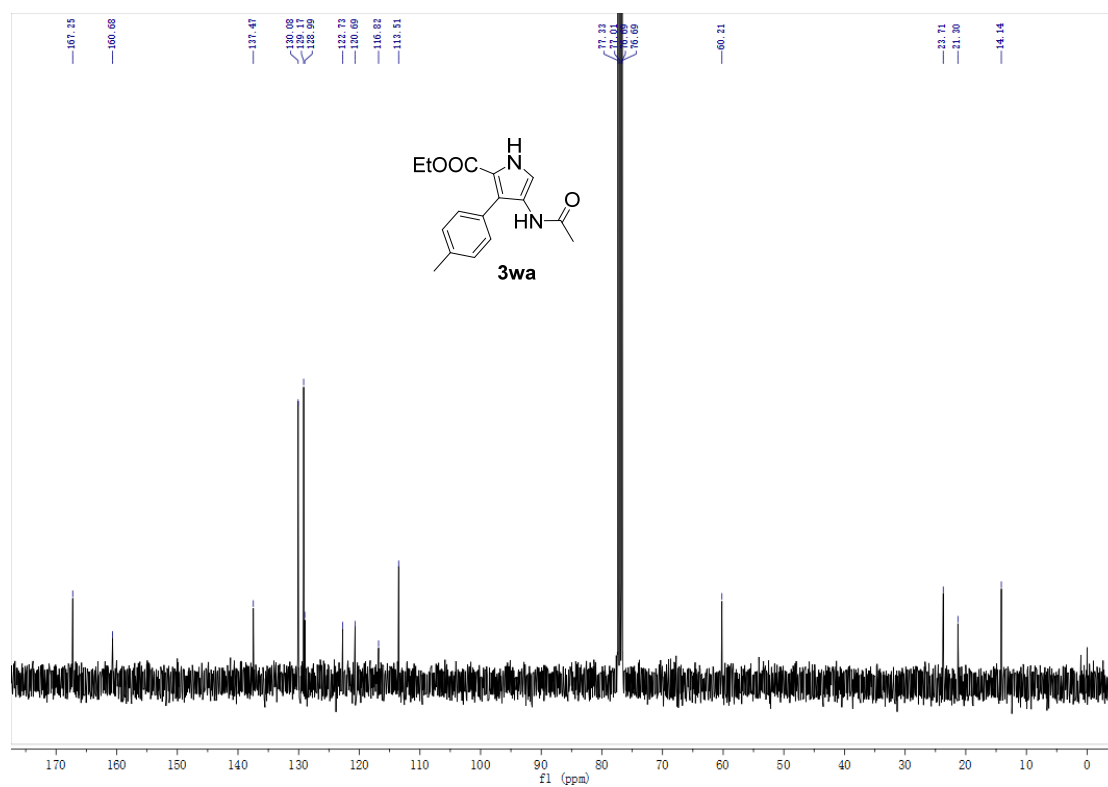

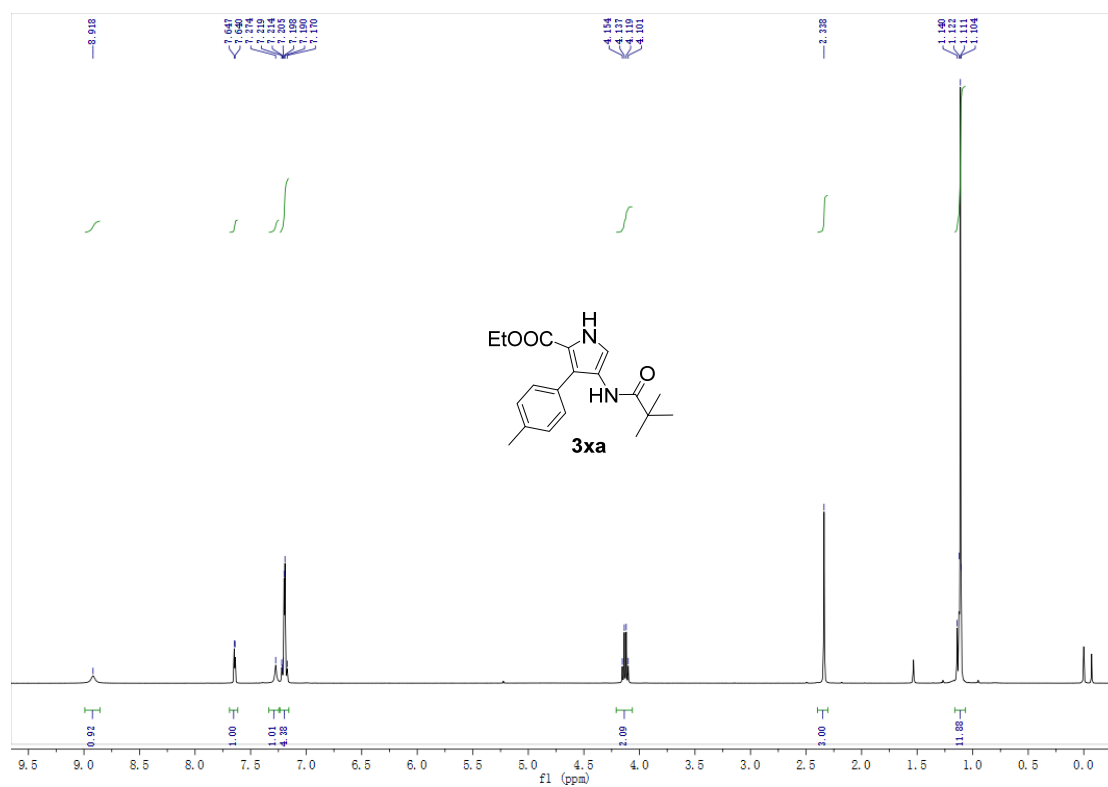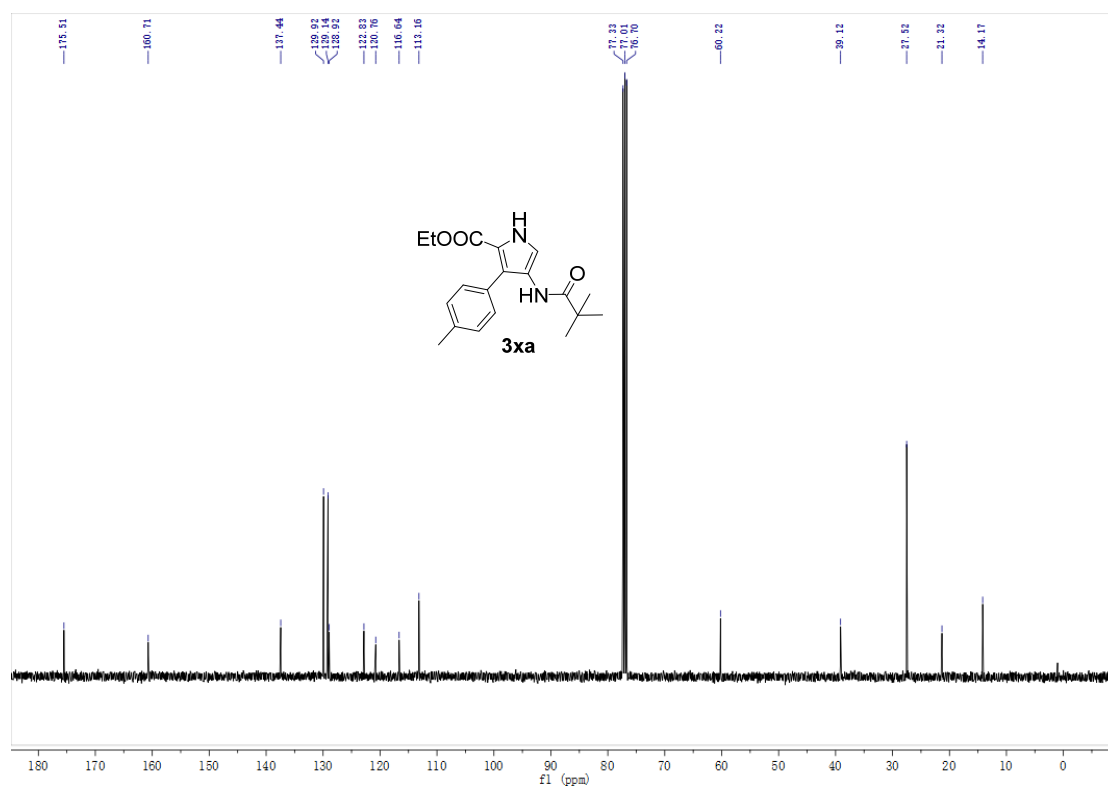

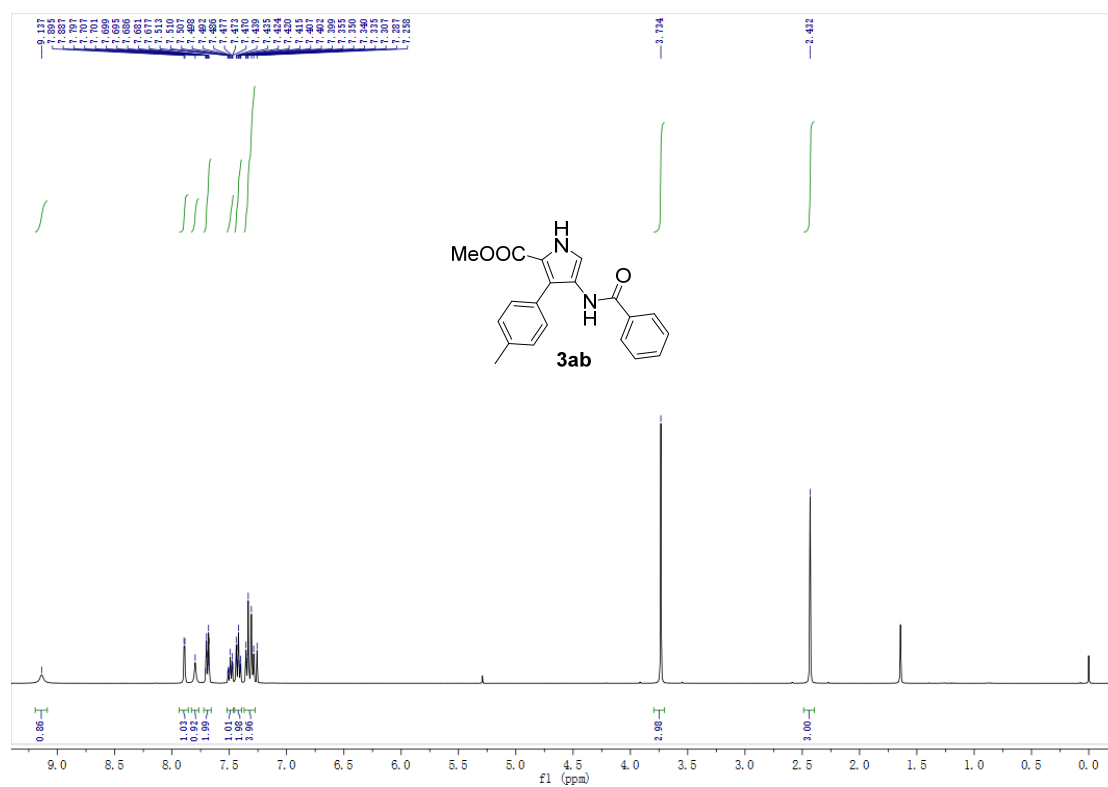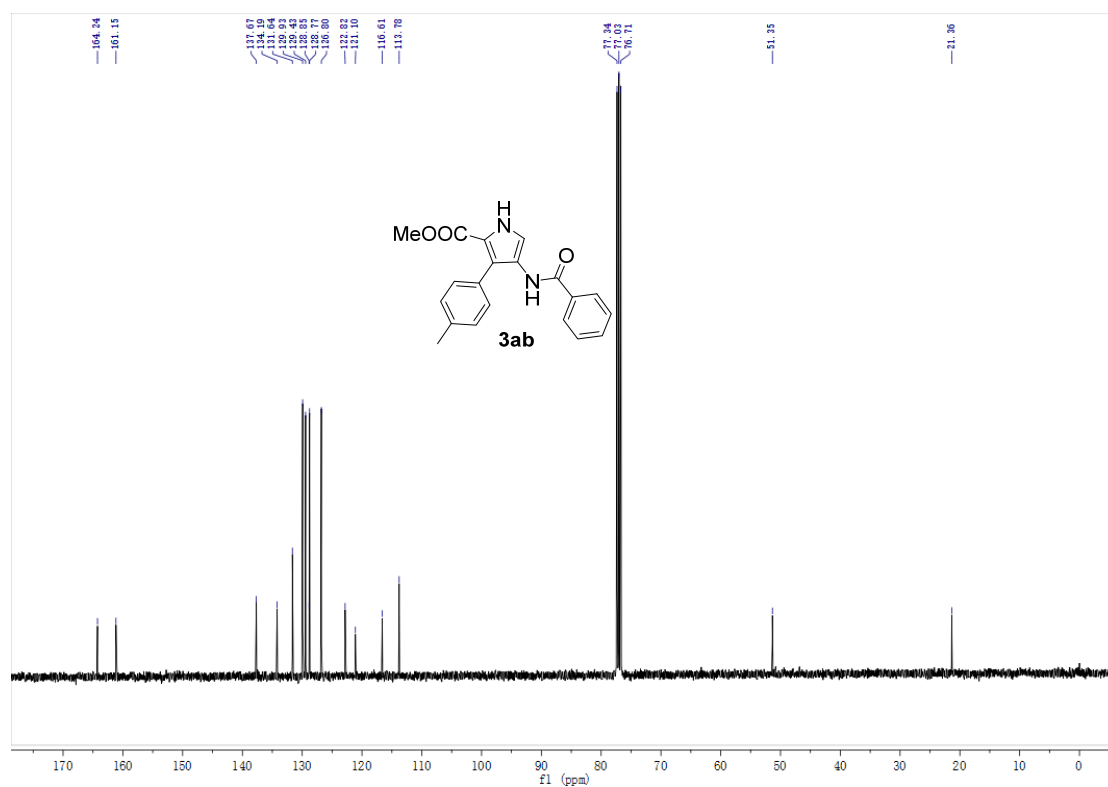

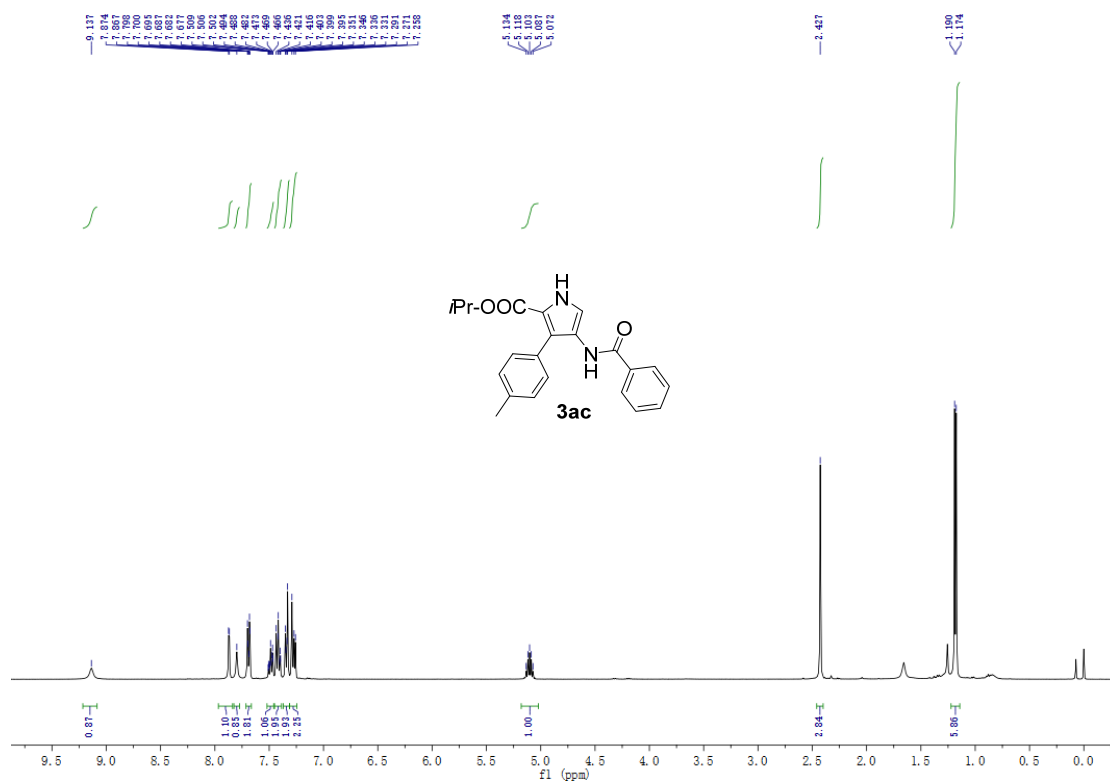

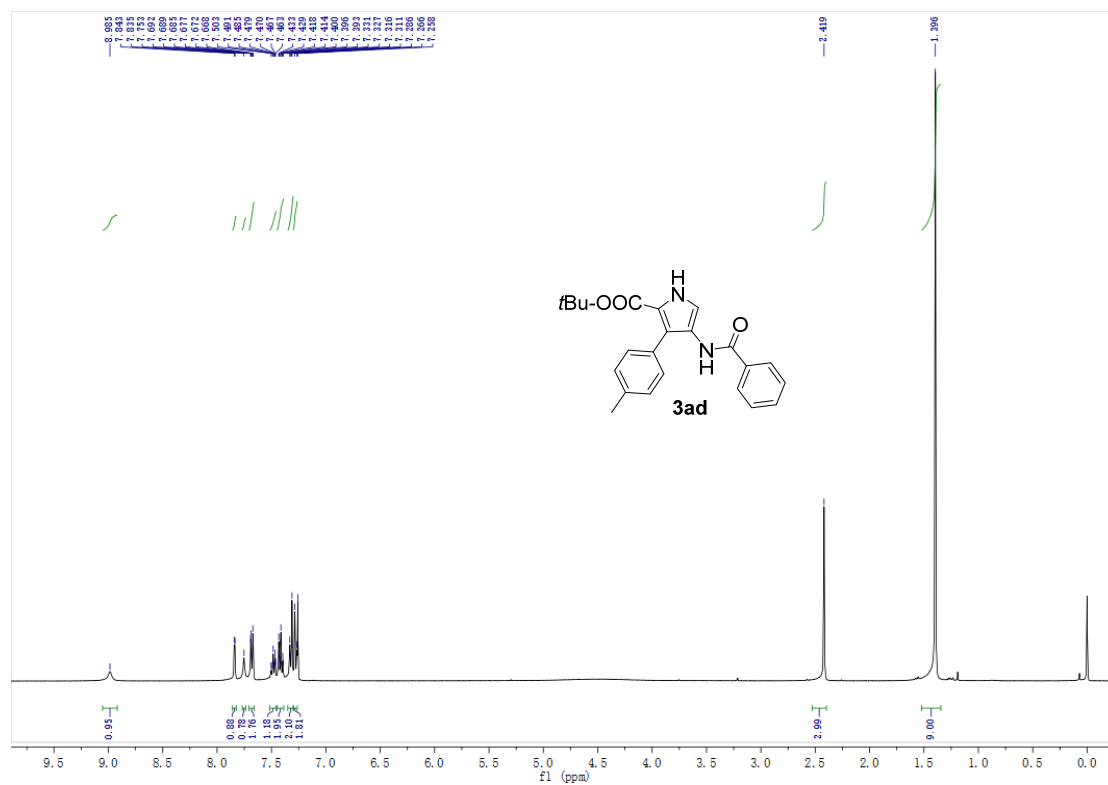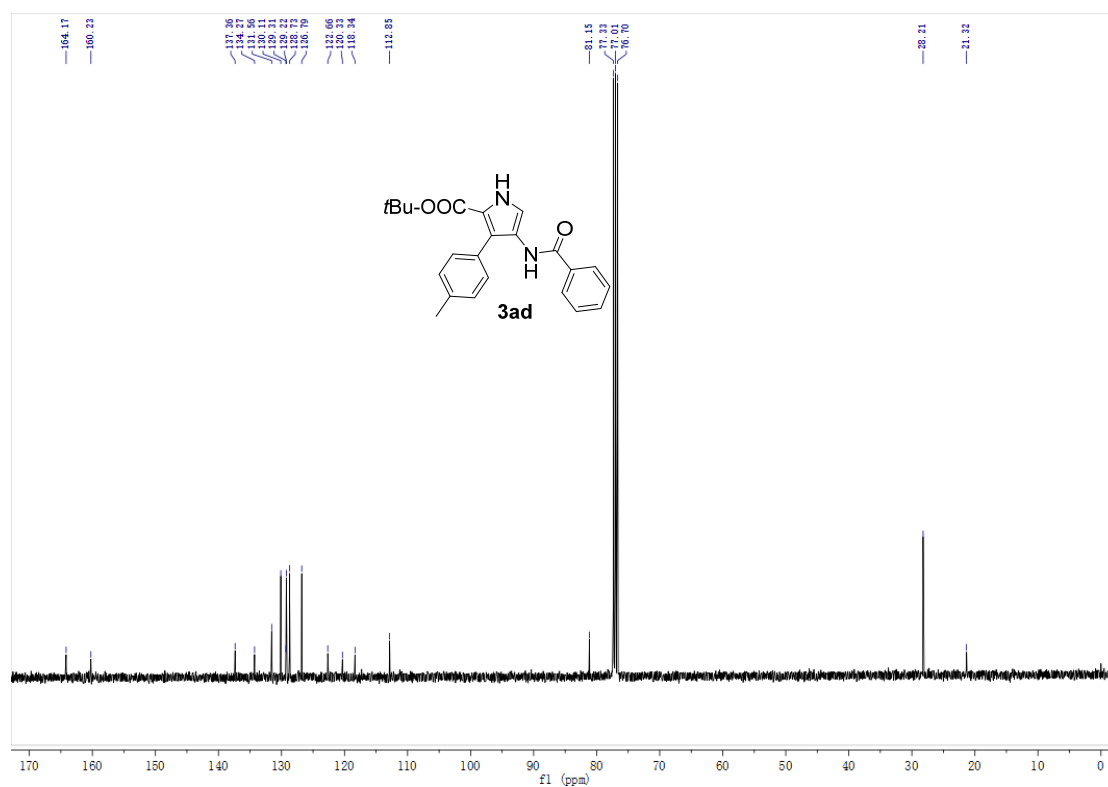

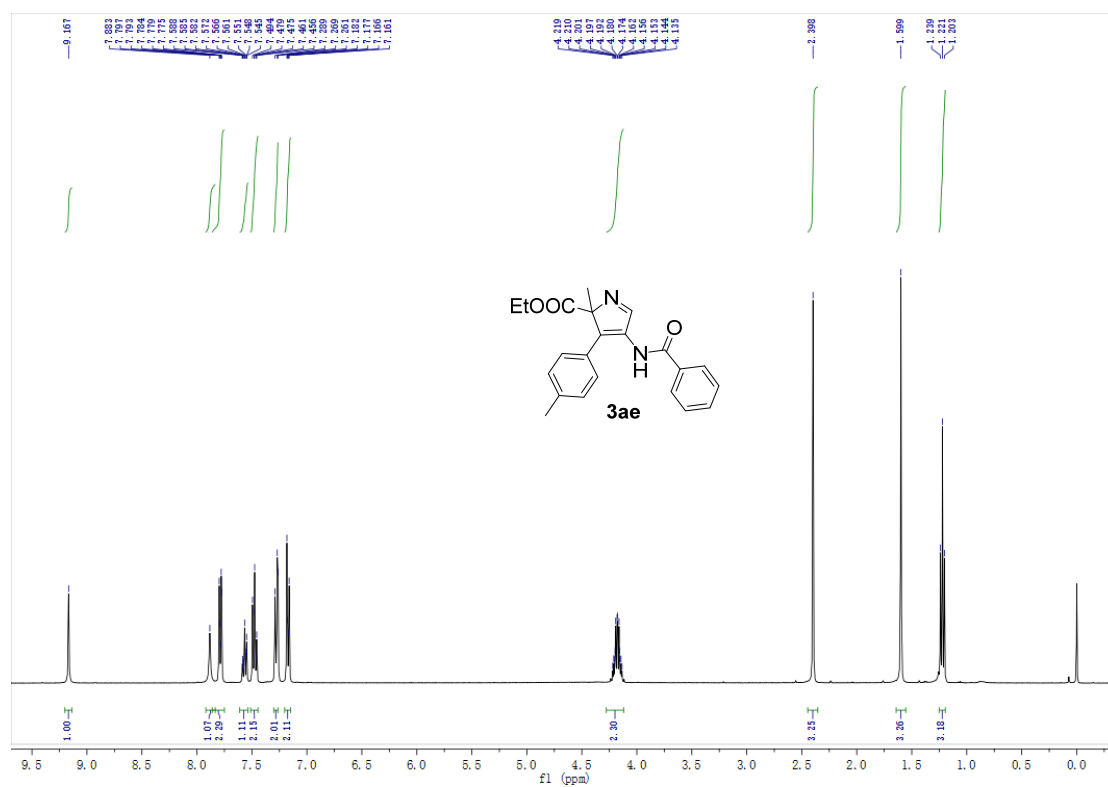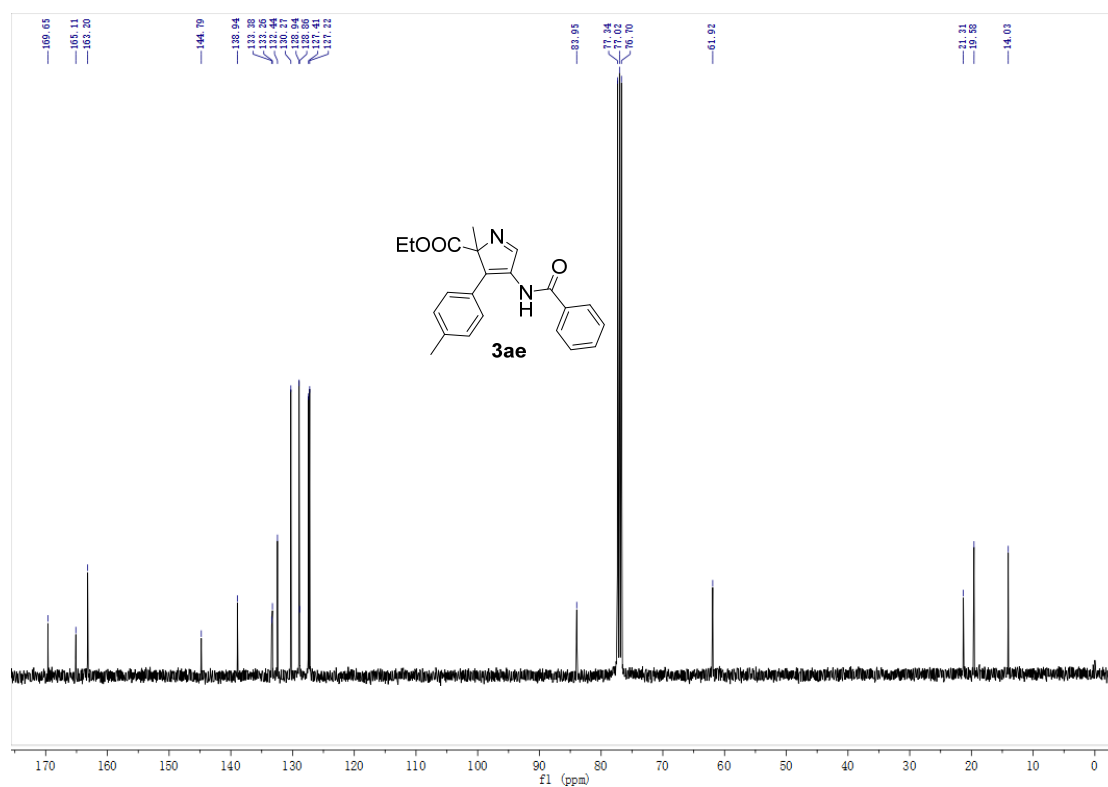

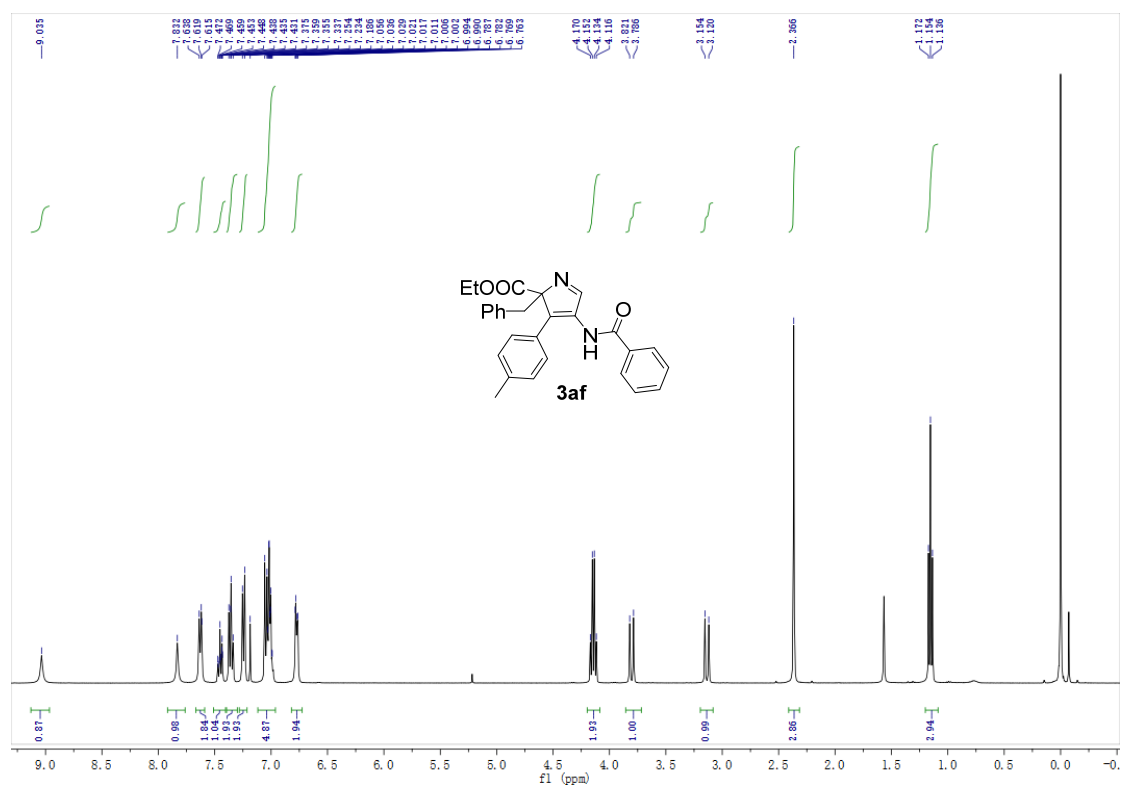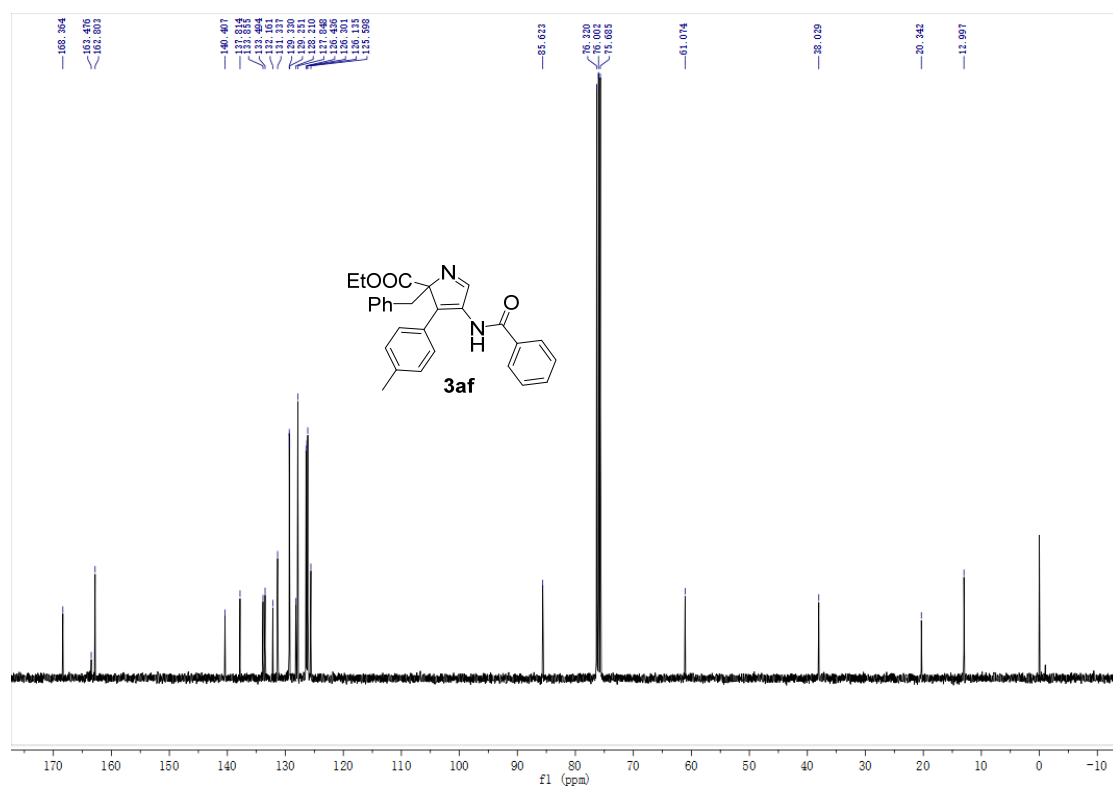

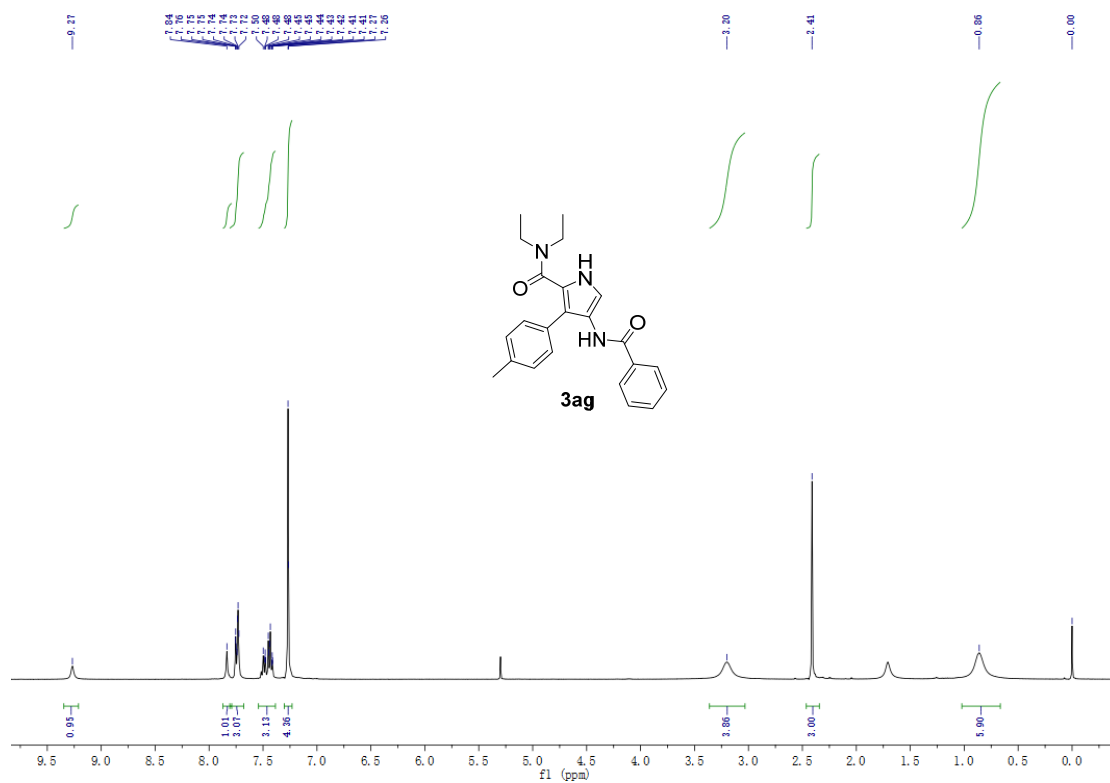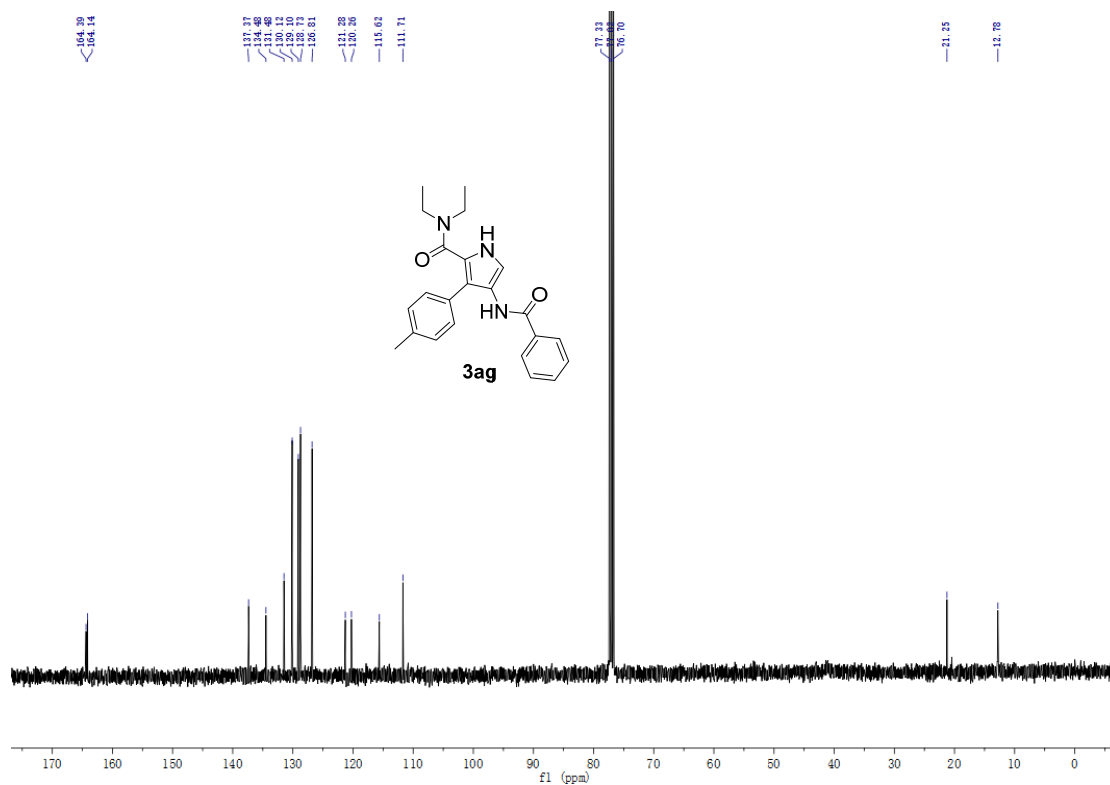

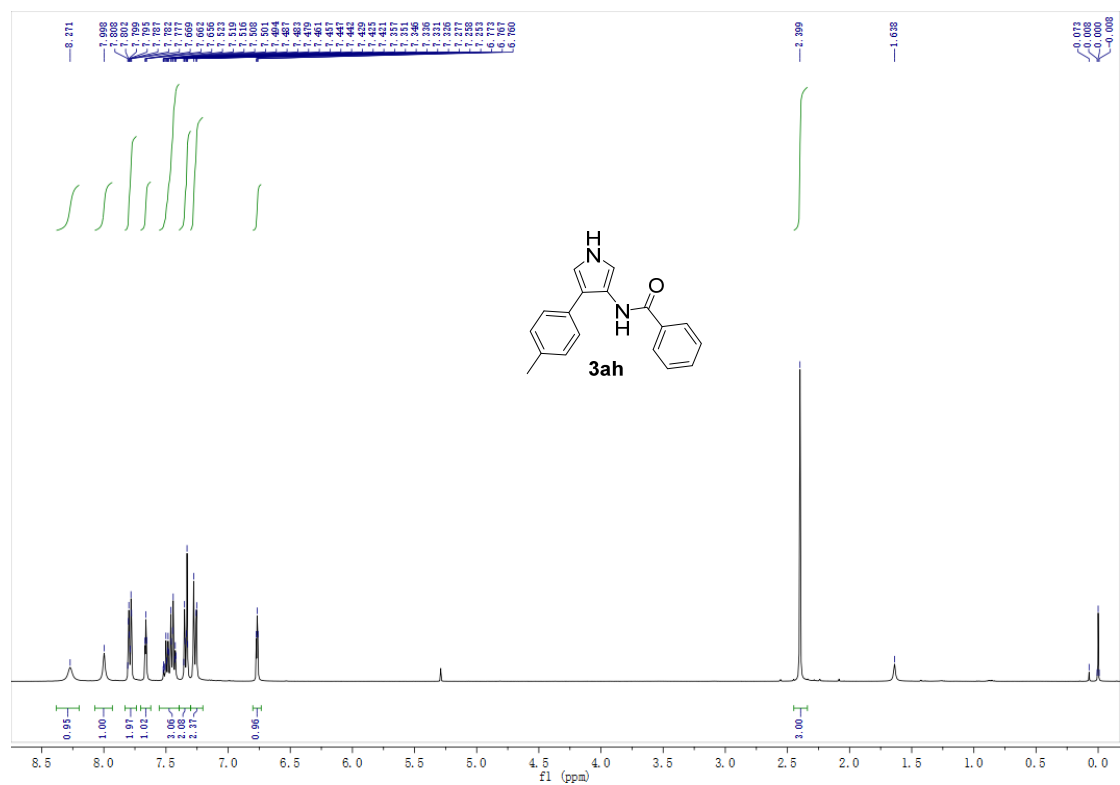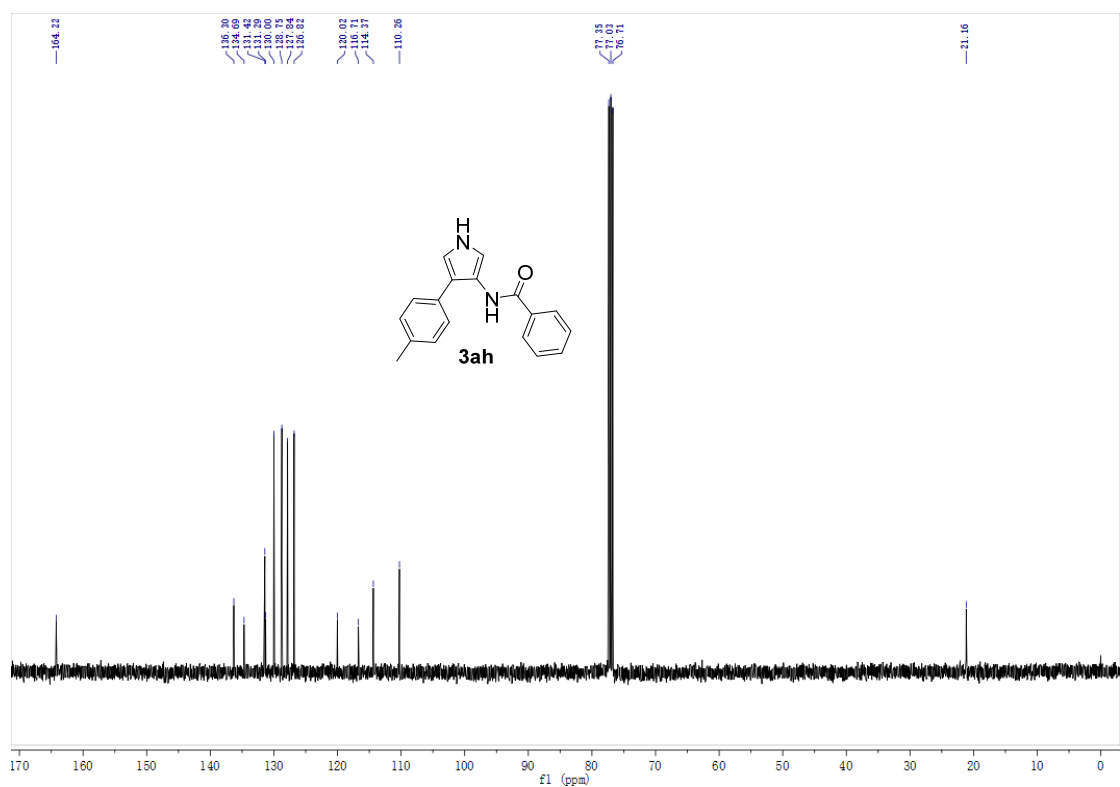

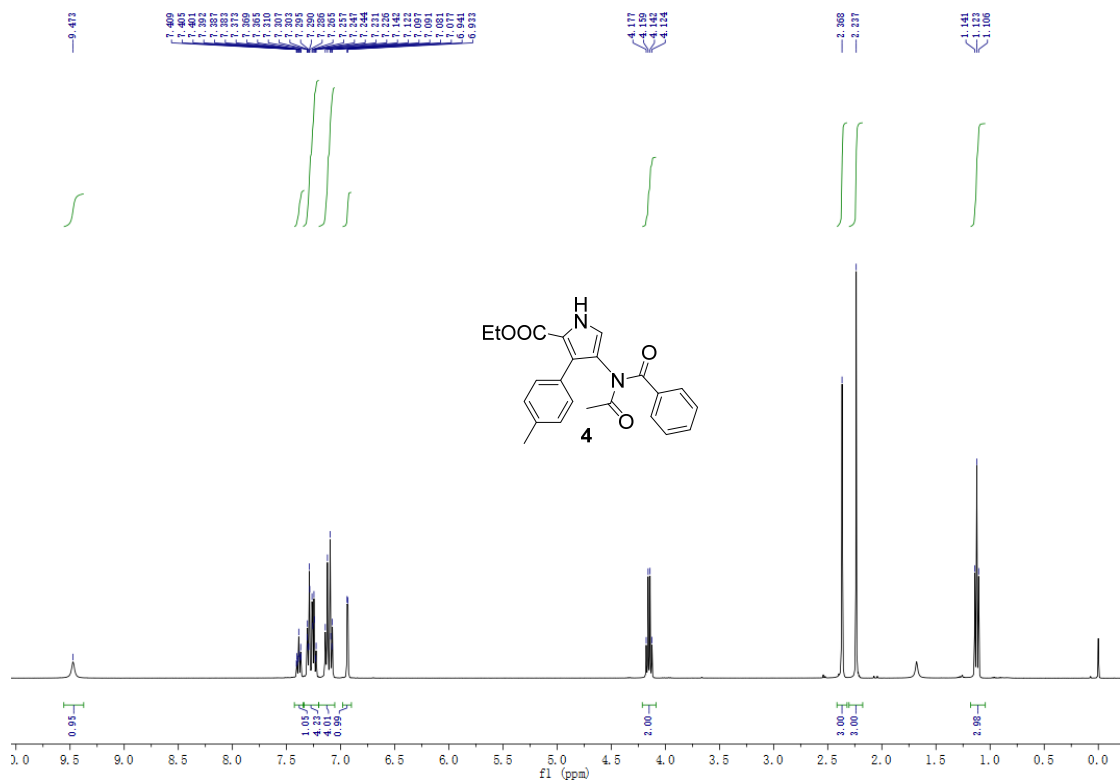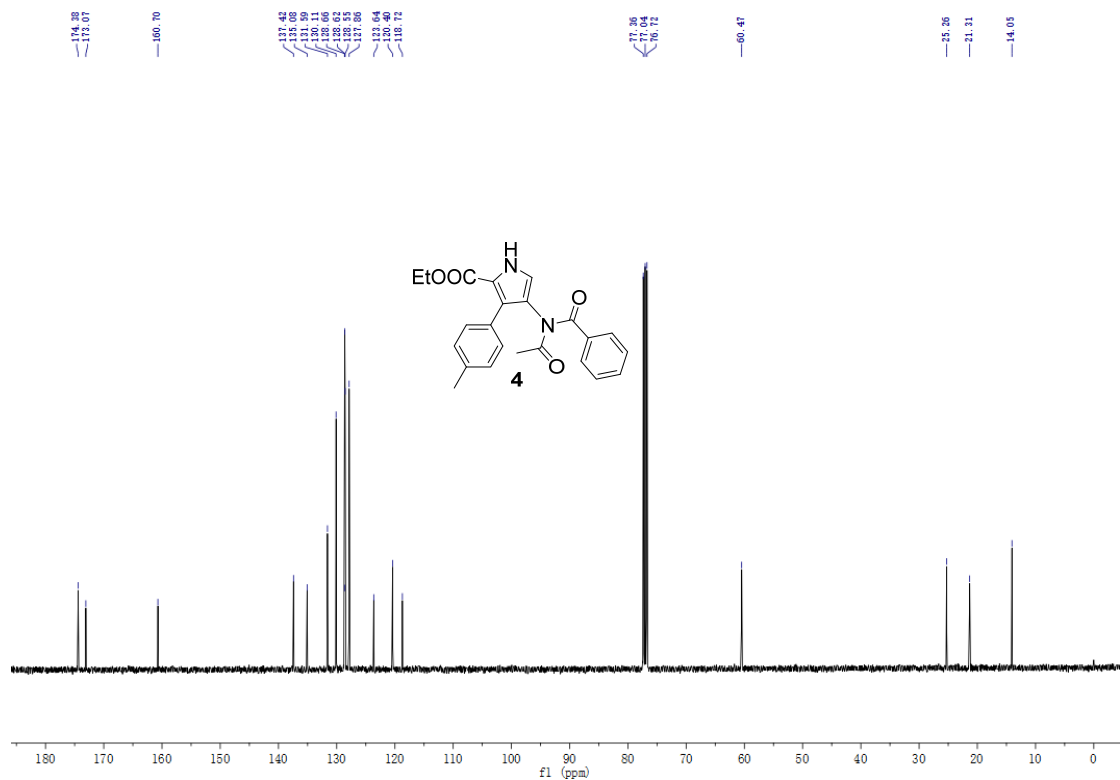

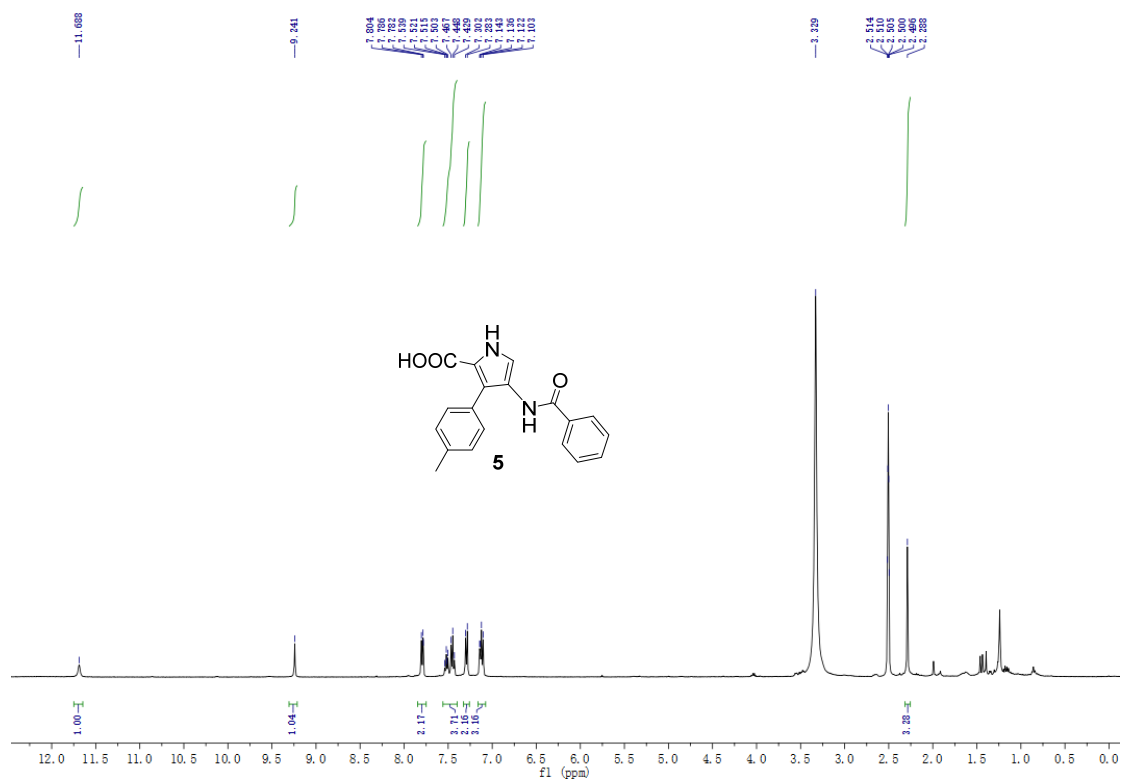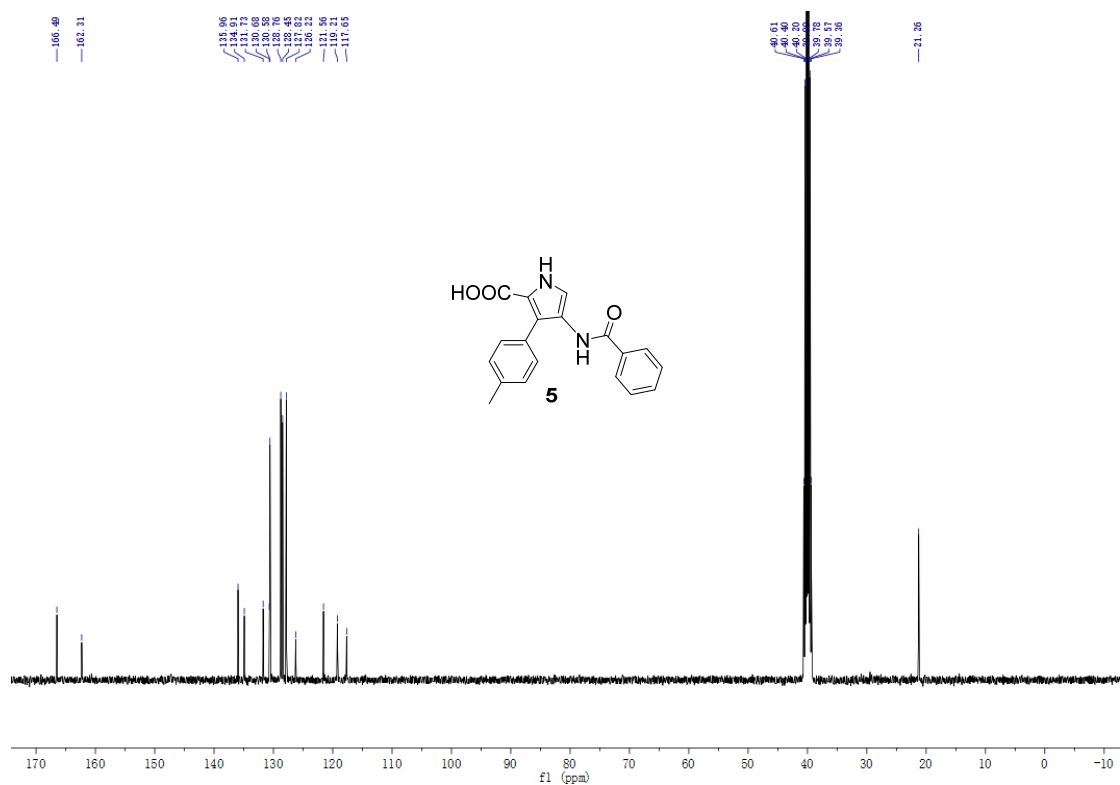

Supplement: c9qo01044k1.pdf [file c9qo01044k1.pdf]
